# Supplementary material
Source: PubMed Central journal article supplement (PMC3412564)
Supplement: NIHMS391222-supplement-1_si_001.pdf [file NIHMS391222-supplement-1_si_001.pdf]

## **Supporting Information:**

### **Saquayamycins G-K, Cytotoxic Angucyclines from *Streptomyces* sp. Including Two Angucycline Derivatives Bearing Aminosugar Rednose**

Khaled A. Shaaban,<sup>†</sup> Tamer A. Ahmed,<sup>†</sup> Markos Leggas,<sup>†,‡</sup> and Jürgen Rohr<sup>\*,†,‡</sup>

*Department of Pharmaceutical Sciences, College of Pharmacy, University of Kentucky, 789 South Limestone Street, Lexington, Kentucky 40536-0596, USA, and Markey Cancer Center, University of Kentucky, 800 Rose Street, Lexington, Kentucky 40536-0293, USA.*

<sup>†</sup> Department of Pharmaceutical Sciences, College of Pharmacy

<sup>‡</sup> Markey Cancer Center

\* To whom correspondence should be addressed. Tel: +1 859 323 5031

Fax: +1 859 257 7564. E-mail: [jrohr2@email.uky.edu](mailto:jrohr2@email.uky.edu)

## Supporting Information

HPLC analysis of the crude extract obtained from the *Streptomyces* sp. KY40-1; work-up procedure scheme; NMR and mass spectra of isolated angucyclines (**1-8**).

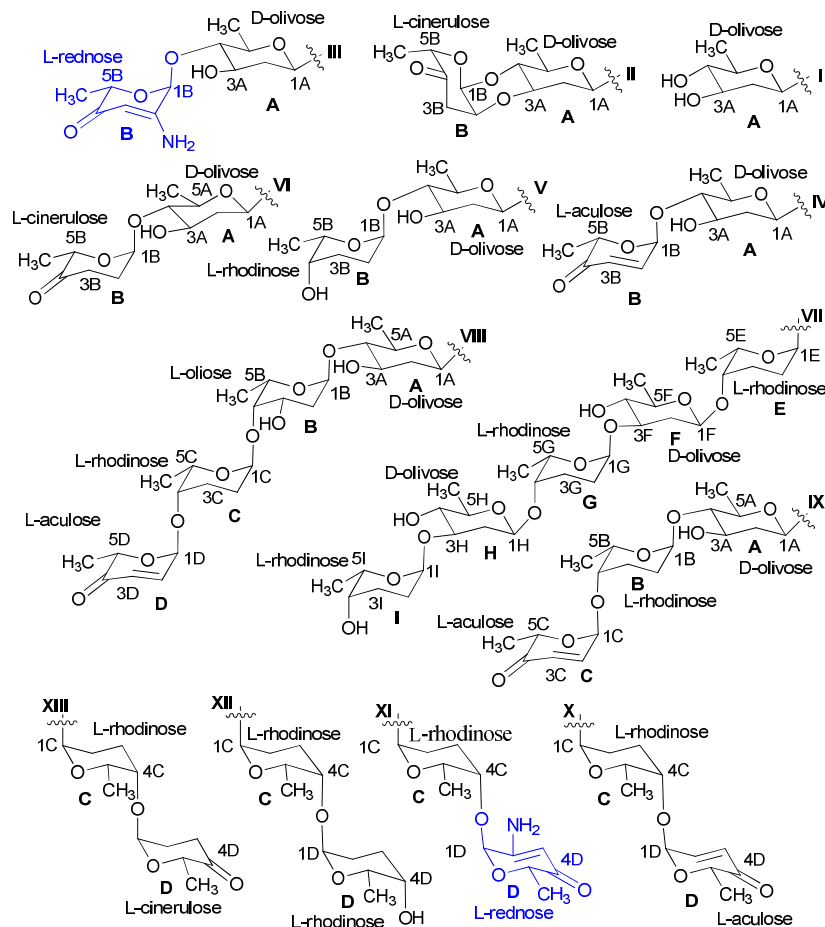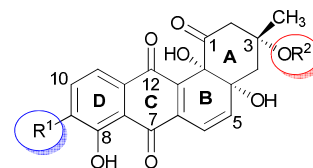

- 1: R<sup>1</sup> = I, R<sup>2</sup> = X; Saquayamycin G
- 2: R<sup>1</sup> = II, R<sup>2</sup> = XI; Saquayamycin H
- 3: R<sup>1</sup> = III, R<sup>2</sup> = X; Saquayamycin I
- 4: R<sup>1</sup> = II, R<sup>2</sup> = XII; Saquayamycin J
- 5: R<sup>1</sup> = V, R<sup>2</sup> = X; Saquayamycin K
- 6: R<sup>1</sup> = II, R<sup>2</sup> = H; Saquayamycin B1
- 7: R<sup>1</sup> = IV, R<sup>2</sup> = X; Saquayamycin A
- 8: R<sup>1</sup> = II, R<sup>2</sup> = X; Saquayamycin B
- 9: R<sup>1</sup> = VI, R<sup>2</sup> = XIII; Saquayamycin C
- 10: R<sup>1</sup> = II, R<sup>2</sup> = XIII; Saquayamycin D
- 11: R<sup>1</sup> = IV, R<sup>2</sup> = H; Saquayamycin A1
- 12: R<sup>1</sup> = VI, R<sup>2</sup> = H; Saquayamycin C1
- 13: R<sup>1</sup> = IV, R<sup>2</sup> = XIII; Saquayamycin E
- 14: R<sup>1</sup> = VI, R<sup>2</sup> = X; Saquayamycin F
- 15: R<sup>1</sup> = VIII, R<sup>2</sup> = VII; Saquayamycin Z
- 16: R<sup>1</sup> = IX, R<sup>2</sup> = H; A-7884
- 17: R<sup>1</sup> = I, R<sup>2</sup> = H; Aquayamycin

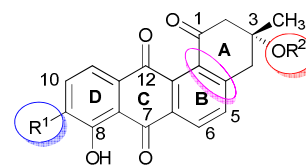

- 18: R<sup>1</sup> = II, R<sup>2</sup> = X; Moromycin A
- 19: R<sup>1</sup> = II, R<sup>2</sup> = H; Moromycin B

| Contents                                                                                                                                                                                                                                                                                                                                                                                                                                                                                                                                                                          | Page |
|-----------------------------------------------------------------------------------------------------------------------------------------------------------------------------------------------------------------------------------------------------------------------------------------------------------------------------------------------------------------------------------------------------------------------------------------------------------------------------------------------------------------------------------------------------------------------------------|------|
| <b>Figure S1:</b> Work-up procedure of extracts from the <i>Streptomyces</i> sp. KY40-1                                                                                                                                                                                                                                                                                                                                                                                                                                                                                           | S5   |
| <b>Figure S2:</b> UV (MeOH) spectra of the new Saquayamycins G-K (1-5) and Saquayamycin B1 (6) in comparison with Saquayamycin B (8)                                                                                                                                                                                                                                                                                                                                                                                                                                              | S6   |
| <b>Figure S3:</b> <sup>1</sup> H- <sup>1</sup> H-COSY (bold lines) and selected HMBC (→) couplings in Saquayamycin A (7)                                                                                                                                                                                                                                                                                                                                                                                                                                                          | S6   |
| <b>Figure S4:</b> Selected NOESY correlations (↔) of Saquayamycin A (7)                                                                                                                                                                                                                                                                                                                                                                                                                                                                                                           | S7   |
| <b>Figure S5:</b> <sup>1</sup> H- <sup>1</sup> H-COSY (bold lines) and selected HMBC (→) couplings in Saquayamycin B (8)                                                                                                                                                                                                                                                                                                                                                                                                                                                          | S7   |
| <b>Figure S6:</b> Selected NOESY correlations (↔) of Saquayamycin B (8)                                                                                                                                                                                                                                                                                                                                                                                                                                                                                                           | S7   |
| <b>Figure S7:</b> A) The <i>Streptomyces</i> sp. KY40-1 was cultivated on M2-agar plates at 28 °C for 3 days; B) A 100 ml of the reddish brown culture broth from <i>Streptomyces</i> sp. KY40-1 after inoculation and cultivation at 28 °C (250 rpm) for 48 hrs on SG-medium. C) Large scale cultivation (6 L) of <i>Streptomyces</i> sp. KY40-1 after inoculation using grown 100 mL preculture, at 28 °C (250 rpm) for 4 days on SG-medium. D) TLC (DCM/5% MeOH) of the water phase and mycelium extracts obtained from the 6 L cultivation of <i>Streptomyces</i> sp. KY40-1. | S8   |
| <b>Figure S8:</b> PTLC (20 x 20 cm) separation of Saquayamycins J (4) and K (5) using <i>n</i> -hexane/60% EtOAc.                                                                                                                                                                                                                                                                                                                                                                                                                                                                 | S9   |
| <b>Figure S9:</b> HPLC analysis of the crude extract obtained from the <i>Streptomyces</i> sp. KY40-1 strain, the detection wavelength was 300 nm. Solvent A: H <sub>2</sub> O, solvent B: acetonitrile; flow rate: 0.5 mLmin <sup>-1</sup> ; 0–15 min, 75-0% A (linear gradient), 15–24 min 0% A and 100 % B, 24–26 min 0-75% A (linear gradient), 26–29 min 75% A.                                                                                                                                                                                                              | S10  |
| <b>Figure S10:</b> (-)-HRESI-MS spectrum of Saquayamycin G (1)                                                                                                                                                                                                                                                                                                                                                                                                                                                                                                                    | S11  |
| <b>Figure S11:</b> (-)-HRESI-MS spectrum of Saquayamycin G (1)                                                                                                                                                                                                                                                                                                                                                                                                                                                                                                                    | S12  |
| <b>Figure S12:</b> <sup>1</sup> H NMR spectrum (CDCl <sub>3</sub> , 500 MHz) of Saquayamycin G (1)                                                                                                                                                                                                                                                                                                                                                                                                                                                                                | S13  |
| <b>Figure S13:</b> <sup>13</sup> C NMR spectrum (CDCl <sub>3</sub> , 125 MHz) of Saquayamycin G (1)                                                                                                                                                                                                                                                                                                                                                                                                                                                                               | S14  |
| <b>Figure S14:</b> <sup>1</sup> H- <sup>1</sup> H COSY spectrum (CDCl <sub>3</sub> , 500 MHz) of Saquayamycin G (1)                                                                                                                                                                                                                                                                                                                                                                                                                                                               | S15  |
| <b>Figure S15:</b> HSQC spectrum (CDCl <sub>3</sub> , 500 MHz) of Saquayamycin G (1)                                                                                                                                                                                                                                                                                                                                                                                                                                                                                              | S16  |
| <b>Figure S16:</b> HMBC spectrum (CDCl <sub>3</sub> , 500 MHz) of Saquayamycin G (1)                                                                                                                                                                                                                                                                                                                                                                                                                                                                                              | S17  |
| <b>Figure S17:</b> NOESY spectrum (CDCl <sub>3</sub> , 500 MHz) of Saquayamycin G (1)                                                                                                                                                                                                                                                                                                                                                                                                                                                                                             | S18  |
| <b>Figure S18:</b> (-)-HRESI-MS spectrum of Saquayamycin H (2)                                                                                                                                                                                                                                                                                                                                                                                                                                                                                                                    | S19  |
| <b>Figure S19:</b> (-)-HRESI-MS spectrum of Saquayamycin H (2)                                                                                                                                                                                                                                                                                                                                                                                                                                                                                                                    | S20  |
| <b>Figure S20:</b> <sup>1</sup> H NMR spectrum (CDCl <sub>3</sub> , 500 MHz) of Saquayamycin H (2)                                                                                                                                                                                                                                                                                                                                                                                                                                                                                | S21  |
| <b>Figure S21:</b> <sup>13</sup> C NMR spectrum (CDCl <sub>3</sub> , 125 MHz) of Saquayamycin H (2)                                                                                                                                                                                                                                                                                                                                                                                                                                                                               | S22  |
| <b>Figure S22:</b> <sup>1</sup> H- <sup>1</sup> H COSY spectrum (CDCl <sub>3</sub> , 500 MHz) of Saquayamycin H (2)                                                                                                                                                                                                                                                                                                                                                                                                                                                               | S23  |
| <b>Figure S23:</b> HSQC spectrum (CDCl <sub>3</sub> , 500 MHz) of Saquayamycin H (2)                                                                                                                                                                                                                                                                                                                                                                                                                                                                                              | S24  |
| <b>Figure S24:</b> HMBC spectrum (CDCl <sub>3</sub> , 500 MHz) of Saquayamycin H (2)                                                                                                                                                                                                                                                                                                                                                                                                                                                                                              | S25  |
| <b>Figure S25:</b> NOESY spectrum (CDCl <sub>3</sub> , 500 MHz) of Saquayamycin H (2)                                                                                                                                                                                                                                                                                                                                                                                                                                                                                             | S26  |
| <b>Figure S26:</b> <sup>1</sup> H NMR spectrum (Acetone- <i>d</i> <sub>6</sub> , 500 MHz) of Saquayamycin I (3)                                                                                                                                                                                                                                                                                                                                                                                                                                                                   | S27  |
| <b>Figure S27:</b> <sup>13</sup> C NMR spectrum (Acetone- <i>d</i> <sub>6</sub> , 125 MHz) of Saquayamycin I (3)                                                                                                                                                                                                                                                                                                                                                                                                                                                                  | S28  |
| <b>Figure S28:</b> <sup>1</sup> H- <sup>1</sup> H COSY spectrum (Acetone- <i>d</i> <sub>6</sub> , 500 MHz) of Saquayamycin I (3)                                                                                                                                                                                                                                                                                                                                                                                                                                                  | S29  |
| <b>Figure S29:</b> HSQC spectrum (Acetone- <i>d</i> <sub>6</sub> , 500 MHz) of Saquayamycin I (3)                                                                                                                                                                                                                                                                                                                                                                                                                                                                                 | S30  |

|                                                                                                                                                                                           |     |
|-------------------------------------------------------------------------------------------------------------------------------------------------------------------------------------------|-----|
| <b>Figure S30:</b> HMBC spectrum (Acetone- <i>d</i> <sub>6</sub> , 500 MHz) of Saquayamycin I ( <b>3</b> )                                                                                | S31 |
| <b>Figure S31:</b> NOESY spectrum (Acetone- <i>d</i> <sub>6</sub> , 500 MHz) of Saquayamycin I ( <b>3</b> )                                                                               | S32 |
| <b>Figure S32:</b> <sup>1</sup> H NMR spectrum (CDCl <sub>3</sub> , 500 MHz) of Saquayamycin J ( <b>4</b> )                                                                               | S33 |
| <b>Figure S33:</b> <sup>13</sup> C NMR spectrum (CDCl <sub>3</sub> , 125 MHz) of Saquayamycin J ( <b>4</b> )                                                                              | S34 |
| <b>Figure S34:</b> <sup>1</sup> H- <sup>1</sup> H COSY spectrum (CDCl <sub>3</sub> , 500 MHz) of Saquayamycin J ( <b>4</b> )                                                              | S35 |
| <b>Figure S35:</b> HSQC spectrum (CDCl <sub>3</sub> , 500 MHz) of Saquayamycin J ( <b>4</b> )                                                                                             | S36 |
| <b>Figure S36:</b> HMBC spectrum (CDCl <sub>3</sub> , 500 MHz) of Saquayamycin J ( <b>4</b> )                                                                                             | S37 |
| <b>Figure S37:</b> NOESY spectrum (CDCl <sub>3</sub> , 500 MHz) of Saquayamycin J ( <b>4</b> )                                                                                            | S38 |
| <b>Figure S38:</b> (-)-HRESI-MS spectrum of Saquayamycin K ( <b>5</b> )                                                                                                                   | S39 |
| <b>Figure S39:</b> (-)-HRESI-MS spectrum of Saquayamycin K ( <b>5</b> )                                                                                                                   | S40 |
| <b>Figure S40:</b> <sup>1</sup> H NMR spectrum (CDCl <sub>3</sub> , 500 MHz) of Saquayamycin K ( <b>5</b> )                                                                               | S41 |
| <b>Figure S41:</b> <sup>13</sup> C NMR spectrum (CDCl <sub>3</sub> , 125 MHz) of Saquayamycin K ( <b>5</b> )                                                                              | S42 |
| <b>Figure S42:</b> <sup>1</sup> H- <sup>1</sup> H COSY spectrum (CDCl <sub>3</sub> , 500 MHz) of Saquayamycin K ( <b>5</b> )                                                              | S43 |
| <b>Figure S43:</b> HSQC spectrum (CDCl <sub>3</sub> , 500 MHz) of Saquayamycin K ( <b>5</b> )                                                                                             | S44 |
| <b>Figure S44:</b> HMBC spectrum (CDCl <sub>3</sub> , 500 MHz) of Saquayamycin K ( <b>5</b> )                                                                                             | S45 |
| <b>Figure S45:</b> NOESY spectrum (CDCl <sub>3</sub> , 500 MHz) of Saquayamycin K ( <b>5</b> )                                                                                            | S46 |
| <b>Figure S46:</b> (-)-HRESI-MS spectrum of Saquayamycin B1 ( <b>6</b> )                                                                                                                  | S47 |
| <b>Figure S47:</b> (-)-HRESI-MS spectrum of Saquayamycin B1 ( <b>6</b> )                                                                                                                  | S48 |
| <b>Figure S48:</b> <sup>1</sup> H NMR spectrum (CDCl <sub>3</sub> , 500 MHz) of Saquayamycin B1 ( <b>6</b> )                                                                              | S49 |
| <b>Figure S49:</b> <sup>13</sup> C NMR spectrum (CDCl <sub>3</sub> , 125 MHz) of Saquayamycin B1 ( <b>6</b> )                                                                             | S50 |
| <b>Figure S50:</b> <sup>1</sup> H- <sup>1</sup> H COSY spectrum (CDCl <sub>3</sub> , 500 MHz) of Saquayamycin B1 ( <b>6</b> )                                                             | S51 |
| <b>Figure S51:</b> HSQC spectrum (CDCl <sub>3</sub> , 500 MHz) of Saquayamycin B1 ( <b>6</b> )                                                                                            | S52 |
| <b>Figure S52:</b> HMBC spectrum (CDCl <sub>3</sub> , 500 MHz) of Saquayamycin B1 ( <b>6</b> )                                                                                            | S53 |
| <b>Figure S53:</b> NOESY spectrum (CDCl <sub>3</sub> , 500 MHz) of Saquayamycin B1 ( <b>6</b> )                                                                                           | S54 |
| <b>Figure S54:</b> <sup>1</sup> H NMR spectrum (CDCl <sub>3</sub> , 500 MHz) of Saquayamycin A ( <b>7</b> )                                                                               | S55 |
| <b>Figure S55:</b> <sup>13</sup> C NMR spectrum (CDCl <sub>3</sub> , 125 MHz) of Saquayamycin A ( <b>7</b> )                                                                              | S56 |
| <b>Figure S56:</b> <sup>1</sup> H- <sup>1</sup> H COSY spectrum (CDCl <sub>3</sub> , 500 MHz) of Saquayamycin A ( <b>7</b> )                                                              | S57 |
| <b>Figure S57:</b> HSQC spectrum (CDCl <sub>3</sub> , 500 MHz) of Saquayamycin A ( <b>7</b> )                                                                                             | S58 |
| <b>Figure S58:</b> HMBC spectrum (CDCl <sub>3</sub> , 500 MHz) of Saquayamycin A ( <b>7</b> )                                                                                             | S59 |
| <b>Figure S59:</b> NOESY spectrum (CDCl <sub>3</sub> , 500 MHz) of Saquayamycin A ( <b>7</b> )                                                                                            | S60 |
| <b>Figure S60:</b> <sup>1</sup> H NMR spectrum (CDCl <sub>3</sub> , 500 MHz) of Saquayamycin B ( <b>8</b> )                                                                               | S61 |
| <b>Figure S61:</b> <sup>13</sup> C NMR spectrum (CDCl <sub>3</sub> , 125 MHz) of Saquayamycin B ( <b>8</b> )                                                                              | S62 |
| <b>Figure S62:</b> <sup>1</sup> H- <sup>1</sup> H COSY spectrum (CDCl <sub>3</sub> , 500 MHz) of Saquayamycin B ( <b>8</b> )                                                              | S63 |
| <b>Figure S63:</b> HSQC spectrum (CDCl <sub>3</sub> , 500 MHz) of Saquayamycin B ( <b>8</b> )                                                                                             | S64 |
| <b>Figure S64:</b> HMBC spectrum (CDCl <sub>3</sub> , 500 MHz) of Saquayamycin B ( <b>8</b> )                                                                                             | S65 |
| <b>Figure S65:</b> NOESY spectrum (CDCl <sub>3</sub> , 500 MHz) of Saquayamycin B ( <b>8</b> )                                                                                            | S66 |
| <b>Figure S66:</b> Dose response curve of saquayamycins G-J ( <b>1-4</b> ), in comparison with landomycin A in a prostate cancer cell line (PC3) at 48 h.                                 | S67 |
| <b>Figure S67:</b> Dose response curve of <b>C</b> ) saquayamycins G-J ( <b>1-4</b> ), and <b>D</b> ) saquayamycins K, B1, A and B ( <b>5-8</b> ); in comparison with landomycin A (H460) | S67 |

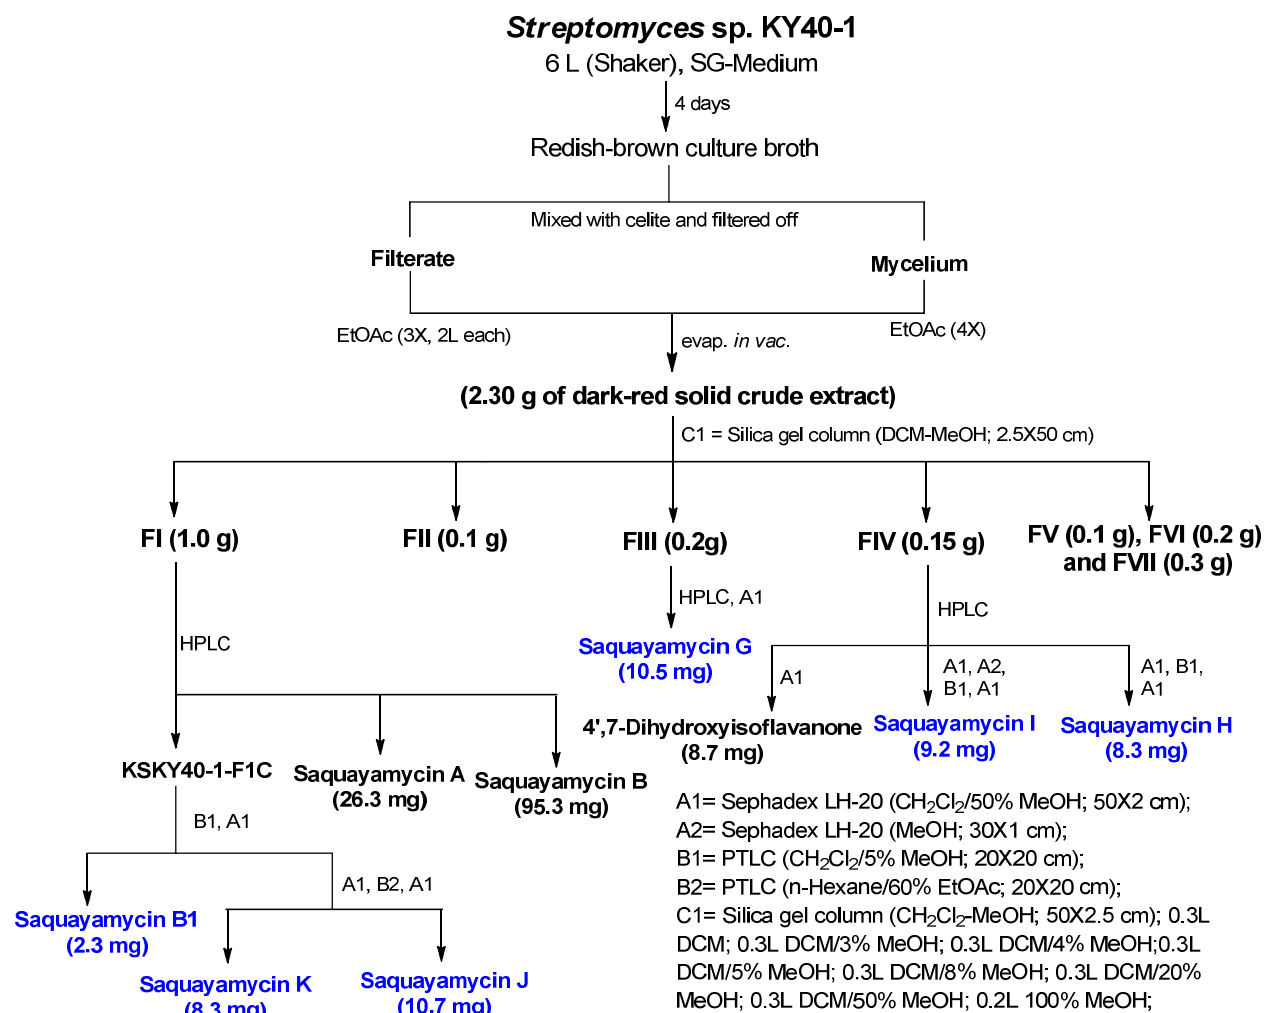

**Figure S1:** Work-up procedure of extracts from the *Streptomyces* sp. KY40-1

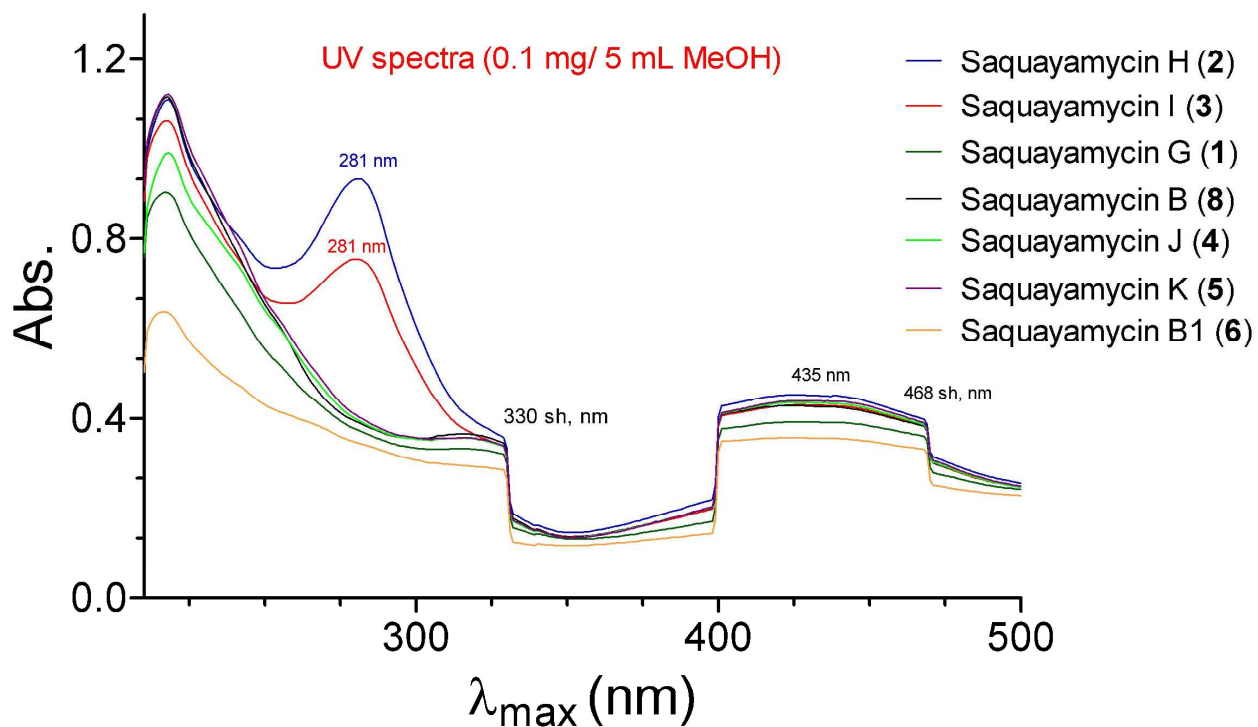

**Figure S2:** UV (MeOH) spectra of the new Saquayamycins G-K (**1-5**) and Saquayamycin B1 (**6**) in comparison with Saquayamycin B (**8**)

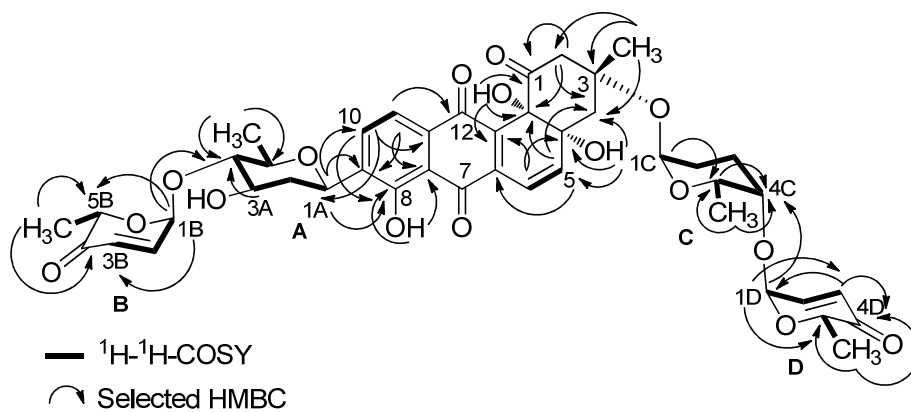

**Figure S3:**  $^1\text{H}$ - $^1\text{H}$ -COSY (bold lines) and selected HMBC ( $\rightarrow$ ) couplings in saquayamycin A (**7**)

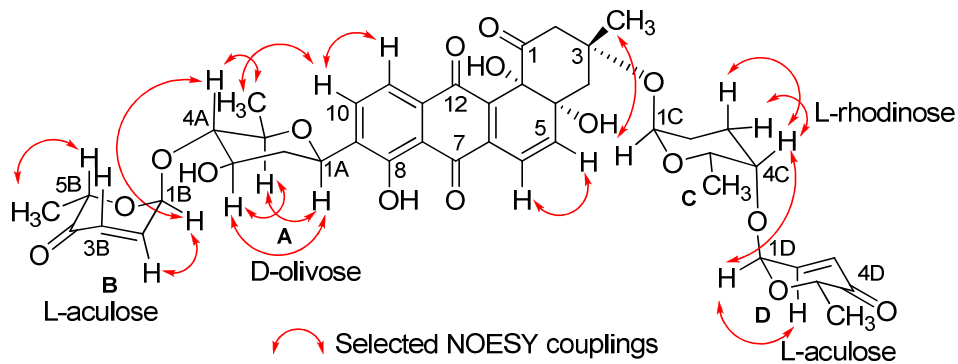

**Figure S4:** Selected NOESY correlations ( $\leftrightarrow$ ) of saquayamycin A (7)

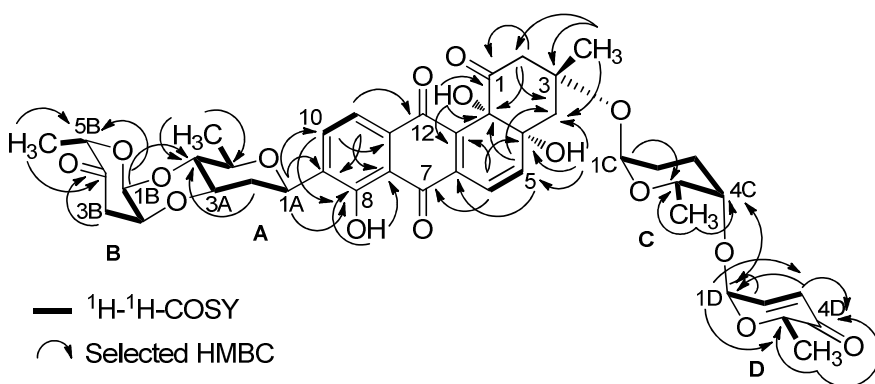

**Figure S5:**  $^1\text{H}$ - $^1\text{H}$ -COSY (bold lines) and selected HMBC ( $\rightarrow$ ) couplings in saquayamycin B (8)

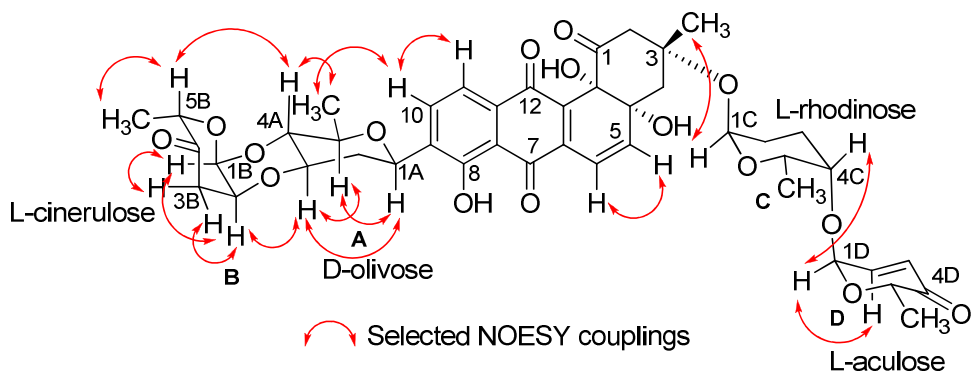

**Figure S6:** Selected NOESY correlations ( $\leftrightarrow$ ) of saquayamycin B (8)

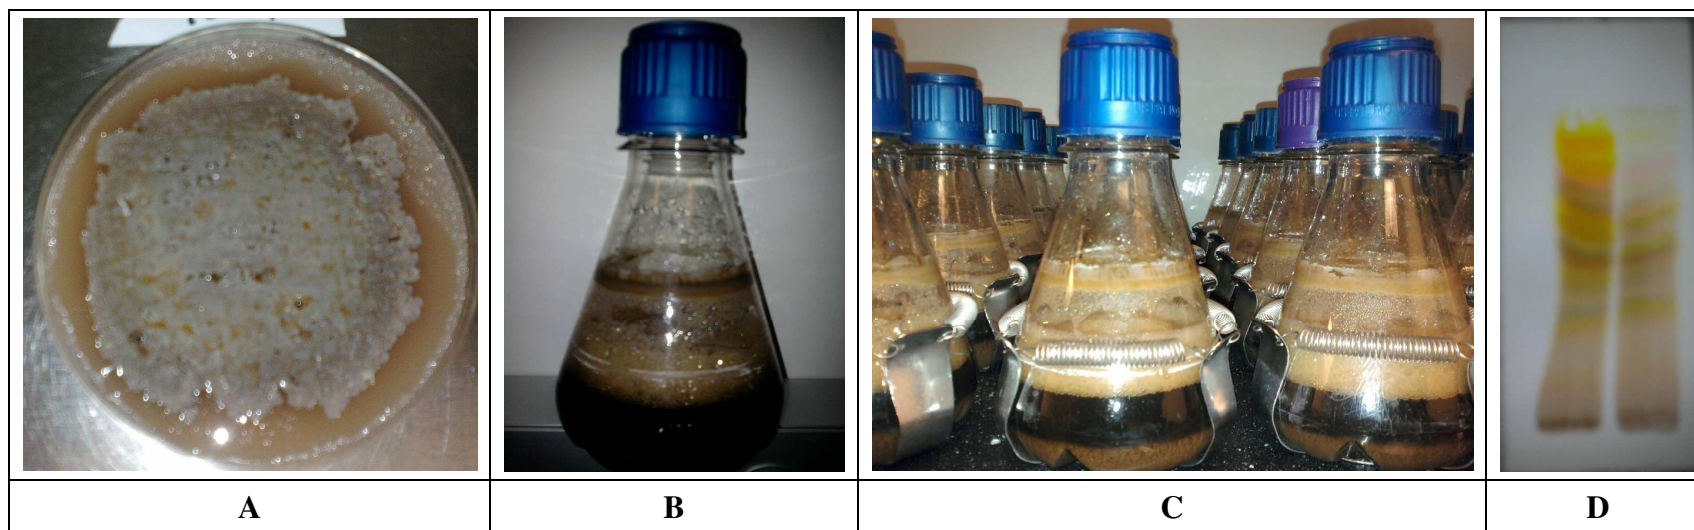

**Figure S7:** **A)** The *Streptomyces* sp. KY40-1 was cultivated on M2-agar plates at 28 °C for 3 days; **B)** A 100 ml of the reddish brown culture broth from *Streptomyces* sp. KY40-1 after inoculation and cultivation at 28 °C (250 rpm) for 48 hrs on SG-medium. **C)** Large scale cultivation (6 L) of *Streptomyces* sp. KY40-1 after inoculation using grown 100 mL preculture, at 28 °C (250 rpm) for 4 days on SG-medium. **D)** TLC (DCM/5% MeOH) of the water phase and mycelium extracts obtained from the 6 L cultivation of *Streptomyces* sp. KY40-1.



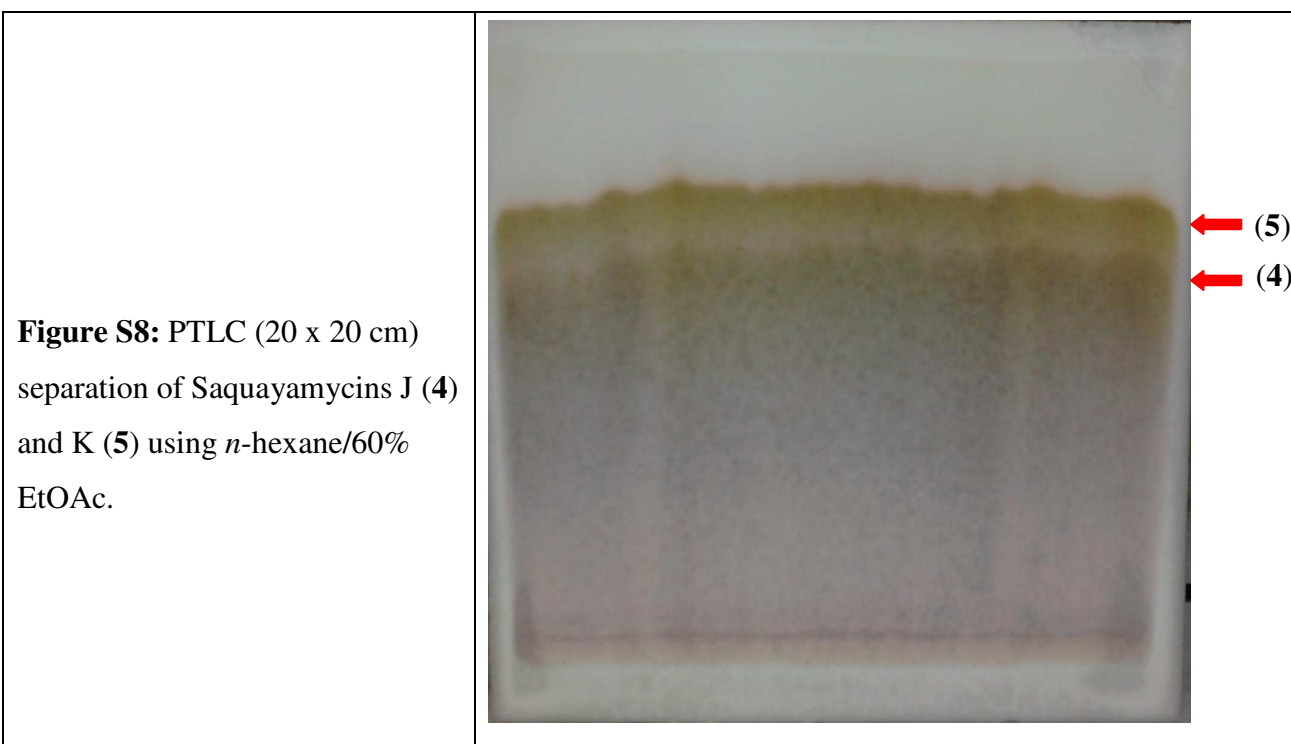

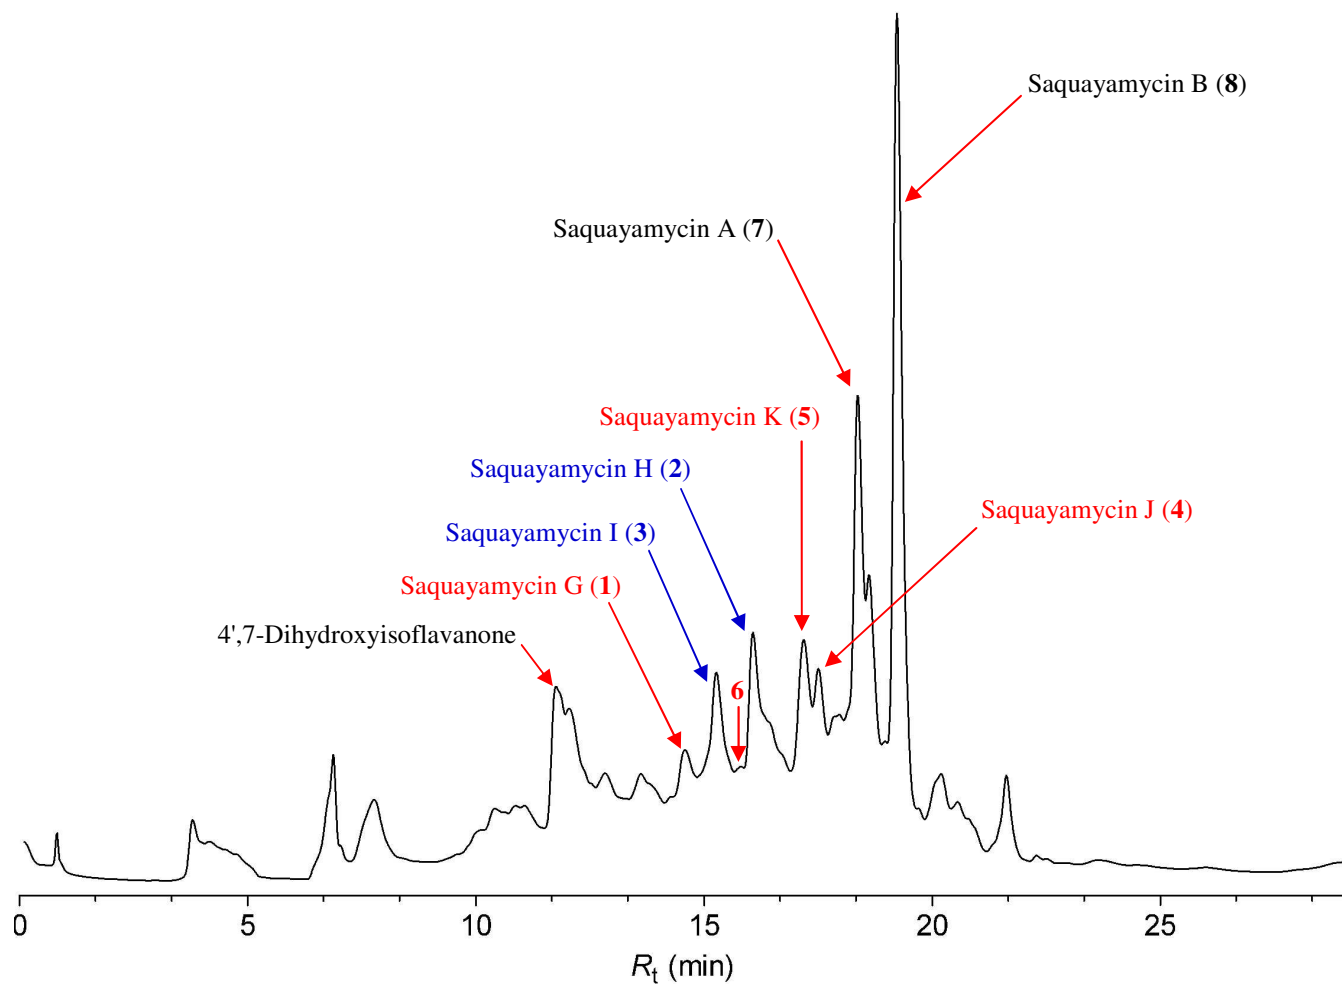

**Figure S9:** HPLC analysis of the crude extract obtained from the *Streptomyces* sp. KY40-1 strain, the detection wavelength was 300 nm. Solvent A: H<sub>2</sub>O, solvent B: acetonitrile; flow rate: 0.5 mLmin<sup>-1</sup>; 0–15 min, 75–0% A (linear gradient), 15–24 min 0% A and 100% B, 24–26 min 0–75% A (linear gradient), 26–29 min 75% A.

■ -TOF MS: 1.038 to 1.238 min from KSKY40-1-F3A.wiff Agilent

Max. 3.5e5 counts

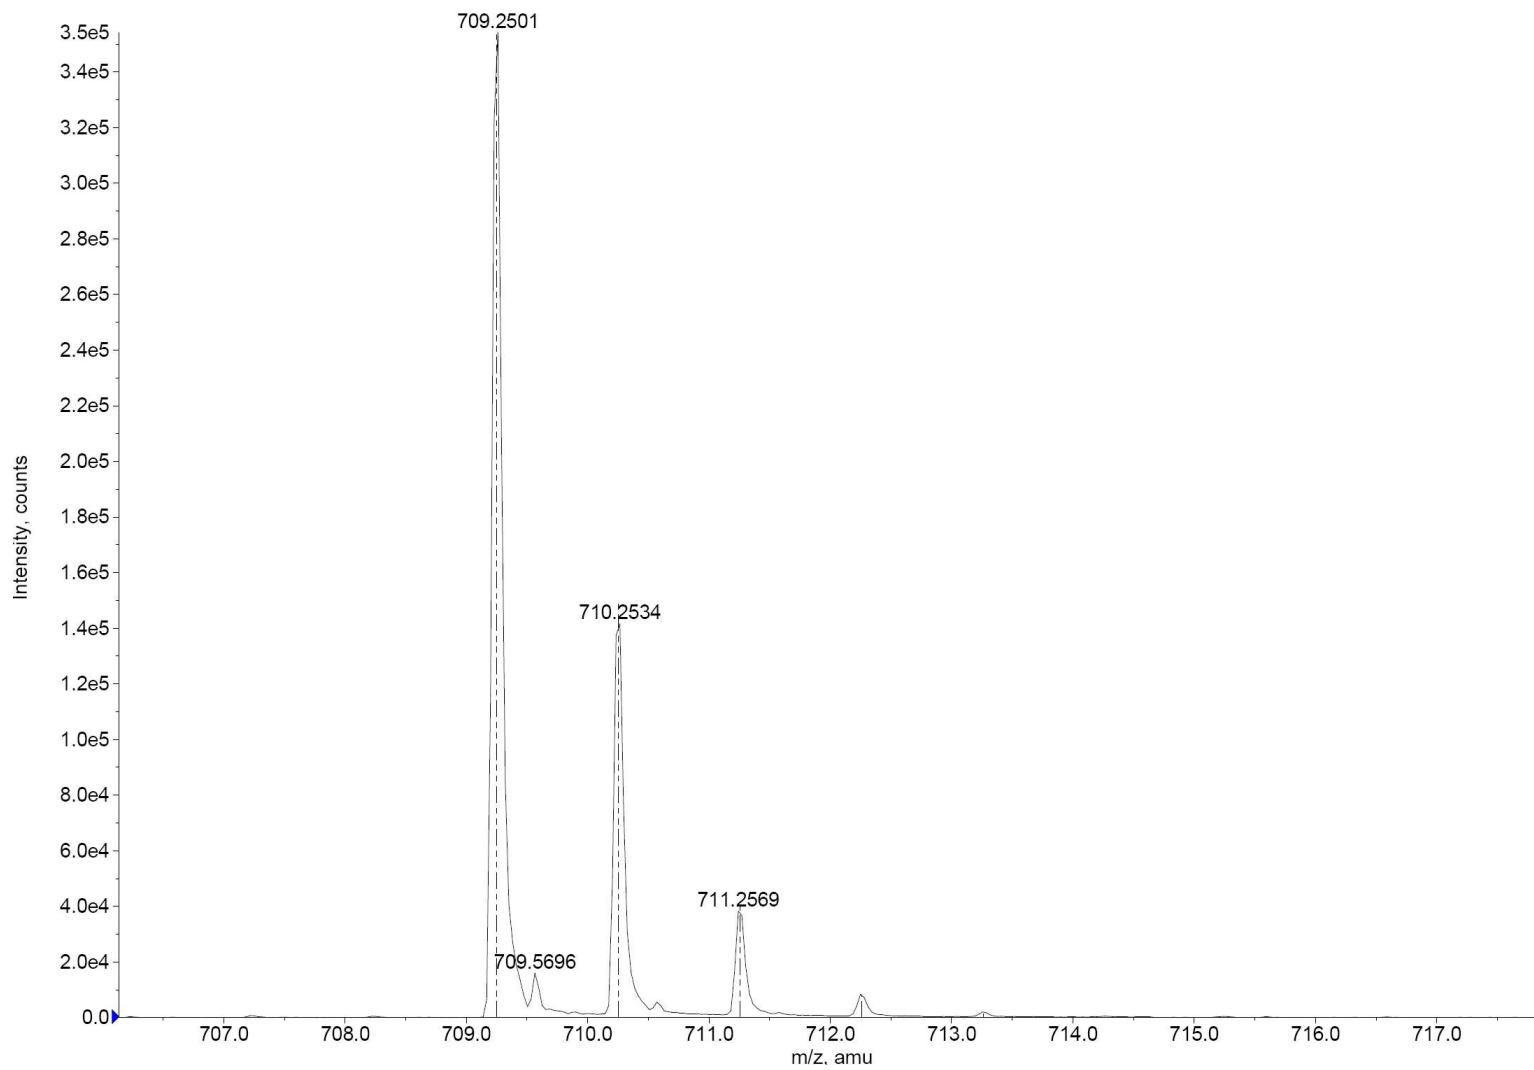

**Figure S10:** (-)-HRESI-MS spectrum of saquayamycin G (**1**)

■ -TOF MS: 1.038 to 1.238 min from KSKY40-1-F3A.wiff Agilent

Max. 3.5e5 counts

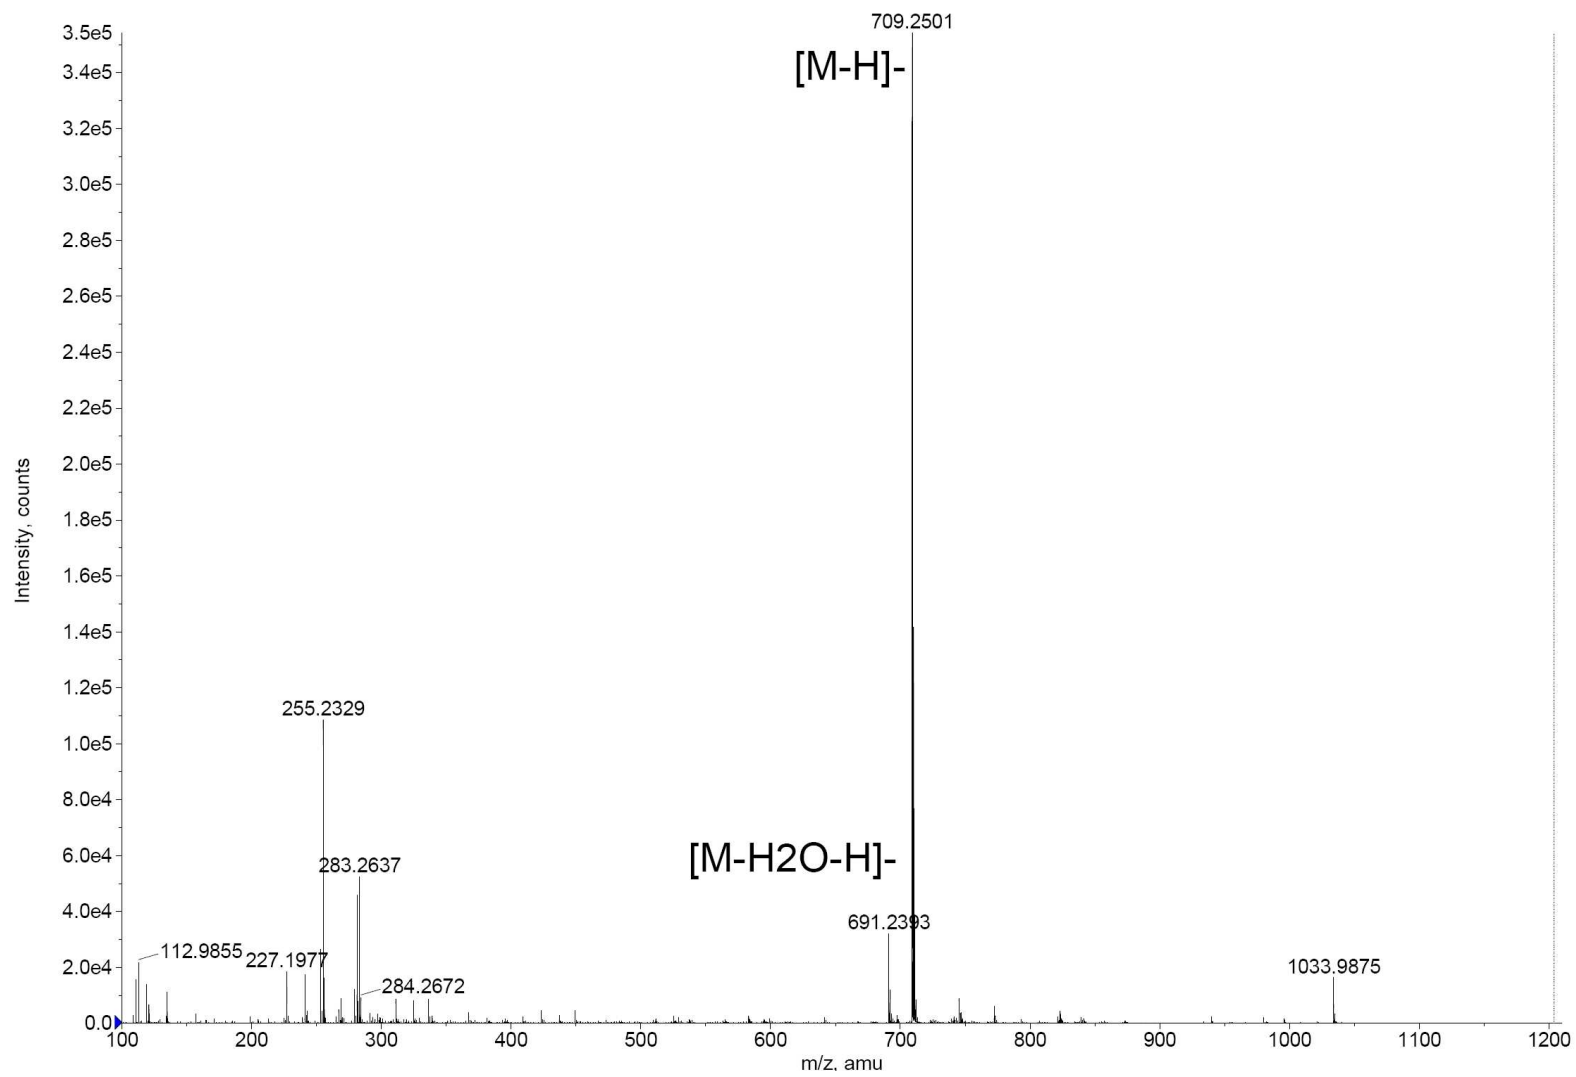

**Figure S11:** (-)-HRESI-MS spectrum of saquayamycin G (1)

KS\_KY40-1\_F3A\_1HNMR\_CDC13\_11\_18\_2010  
CDC13, 500 MHz, nt=16  
Khaled A. Shaaban

Sample: Khaled\_A\_Shaaban  
File: xp

Pulse Sequence: s2pul

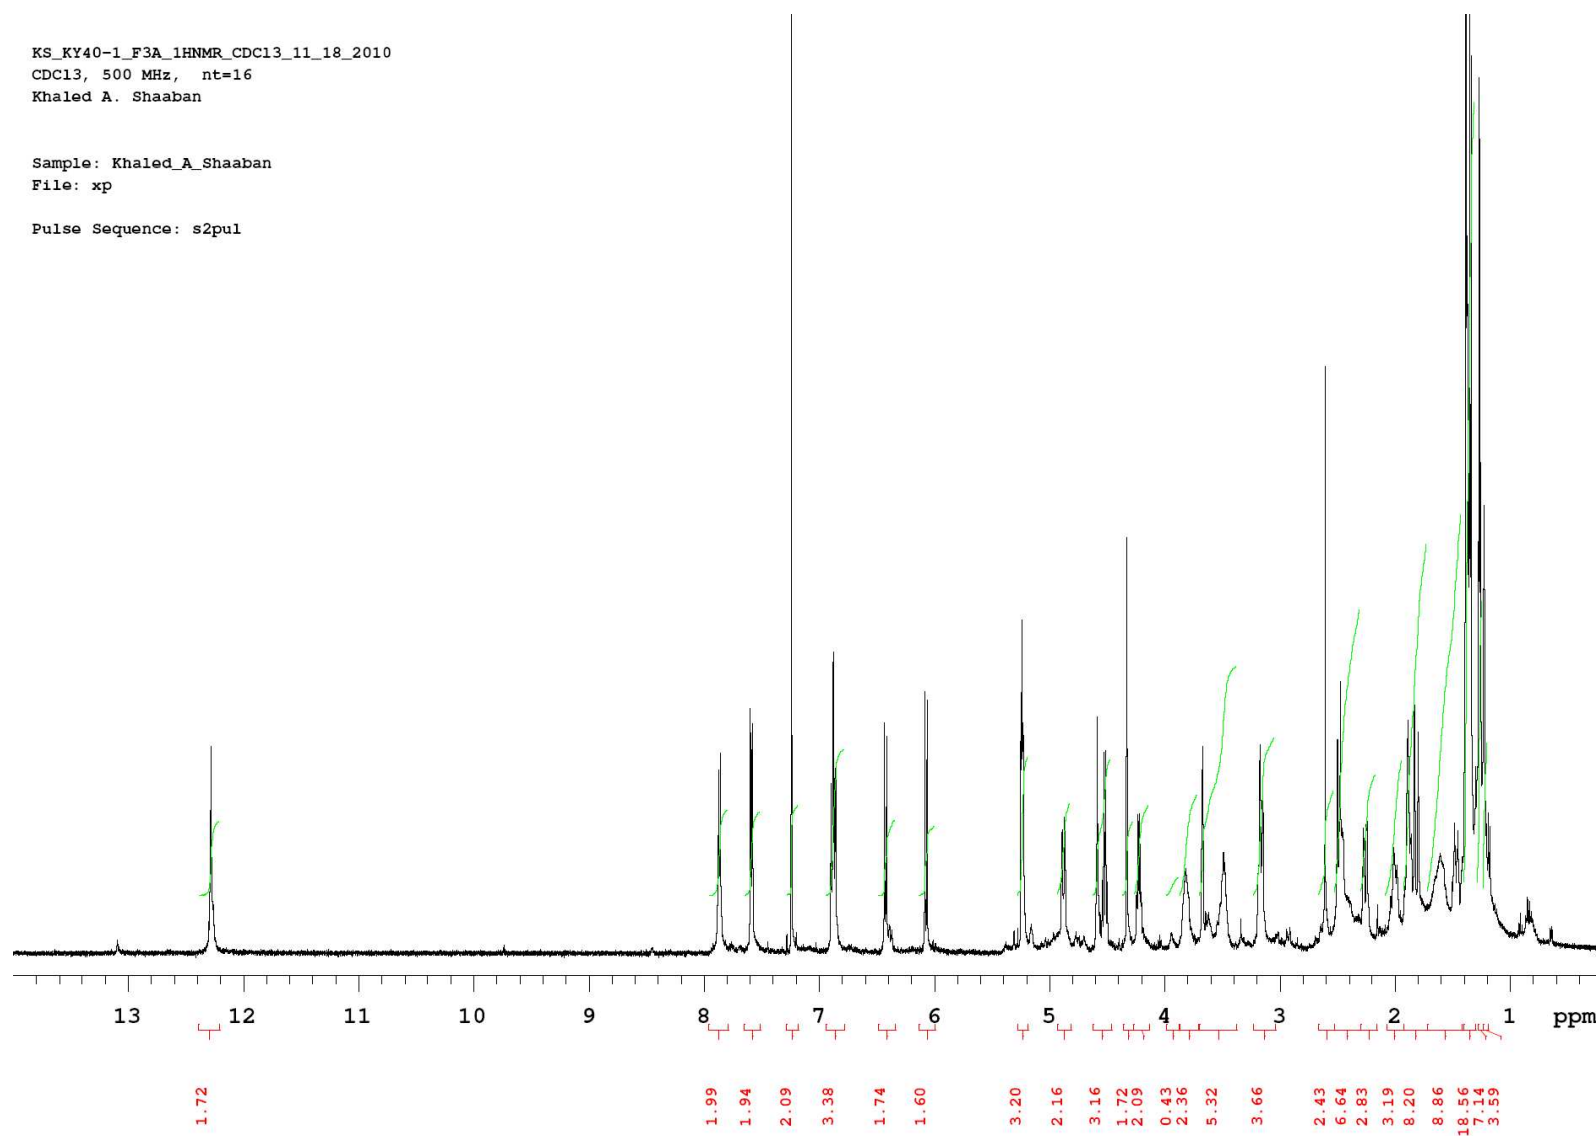

Figure S12: <sup>1</sup>H NMR spectrum (CDCl<sub>3</sub>, 500 MHz) of saquayamycin G (1)

KS\_KY40-1\_F3A\_13CNMR\_CDCl3\_11\_20\_2010  
 CDC13, 125 MHz, time=19 hrs  
 Khaled A. Shaaban

exp2 Carbon

|             |             |            |          |
|-------------|-------------|------------|----------|
| SAMPLE      |             | SPECIAL    |          |
| date        | Nov 19 2010 | temp       | not used |
| solvent     | cdc13       | gain       | 30       |
| file        | exp         | spin       | 20       |
| ACQUISITION |             | hst        | 0.008    |
| sw          | 30487.8     | pw90       | 11.900   |
| at          | 1.300       | alfa       | 10.000   |
| np          | 79298       | FLAGS      |          |
| fb          | 17000       | il         | n        |
| bs          | 64          | in         | n        |
| d1          | 1.000       | dp         | y        |
| nt          | 64000       | hs         | nn       |
| ct          | 29760       | PROCESSING |          |
| TRANSMITTER |             | lb         | 0.50     |
| tn          | C13         | fn         | not used |
| sfrq        | 125.665     | DISPLAY    |          |
| tof         | 1285.1      | sp         | -1120.4  |
| tpwr        | 59          | wp         | 29583.0  |
| pw          | 5.950       | rfl        | 11728.3  |
| DECOUPLER   |             | rfp        | 9704.1   |
| dn          | H1          | rp         | -66.4    |
| dof         | 0           | lp         | -6.8     |
| dm          | yyy         | PLOT       |          |
| dmm         | w           | wc         | 250      |
| dpwr        | 35          | sc         | 0        |
| dmf         | 11448       | vs         | 981015   |
|             |             | th         | 6        |
|             |             | ai         | cdc ph   |

| INDEX | FREQUENCY | PPM     | HEIGHT | INDEX | FREQUENCY | PPM    | HEIGHT |
|-------|-----------|---------|--------|-------|-----------|--------|--------|
| 1     | 25772.8   | 205.113 | 10.2   | 40    | 1932.3    | 15.378 | 33.7   |
| 2     | 24765.1   | 197.094 | 12.5   |       |           |        |        |
| 3     | 23672.8   | 188.401 | 12.7   |       |           |        |        |
| 4     | 22924.8   | 182.448 | 13.2   |       |           |        |        |
| 5     | 19876.7   | 158.190 | 16.7   |       |           |        |        |
| 6     | 18308.5   | 145.709 | 15.4   |       |           |        |        |
| 7     | 18006.1   | 143.302 | 18.3   |       |           |        |        |
| 8     | 17464.6   | 138.993 | 16.5   |       |           |        |        |
| 9     | 17416.3   | 138.608 | 12.3   |       |           |        |        |
| 10    | 16823.6   | 133.891 | 14.9   |       |           |        |        |
| 11    | 16410.0   | 130.600 | 11.2   |       |           |        |        |
| 12    | 16022.0   | 127.512 | 21.4   |       |           |        |        |
| 13    | 15069.3   | 119.929 | 14.7   |       |           |        |        |
| 14    | 14789.7   | 117.704 | 16.1   |       |           |        |        |
| 15    | 14338.4   | 114.113 | 12.7   |       |           |        |        |
| 16    | 11998.9   | 95.494  | 26.8   |       |           |        |        |
| 17    | 11638.8   | 92.628  | 21.8   |       |           |        |        |
| 18    | 10396.3   | 82.739  | 19.2   |       |           |        |        |
| 19    | 10073.0   | 80.166  | 19.8   |       |           |        |        |
| 20    | 9823.1    | 78.178  | 9.1    |       |           |        |        |
| 21    | 9754.8    | 77.634  | 22.8   |       |           |        |        |
| 22    | 9736.1    | 77.485  | 342.1  |       |           |        |        |
| 23    | 9704.1    | 77.230  | 345.6  |       |           |        |        |
| 24    | 9672.4    | 76.978  | 335.4  |       |           |        |        |
| 25    | 9595.2    | 76.364  | 25.4   |       |           |        |        |
| 26    | 9563.1    | 76.108  | 11.6   |       |           |        |        |
| 27    | 9190.5    | 73.143  | 8.8    |       |           |        |        |
| 28    | 8967.2    | 71.365  | 16.7   |       |           |        |        |
| 29    | 8898.3    | 70.818  | 24.9   |       |           |        |        |
| 30    | 8437.3    | 67.148  | 22.9   |       |           |        |        |
| 31    | 6330.8    | 50.384  | 11.0   |       |           |        |        |
| 32    | 5620.5    | 44.731  | 12.7   |       |           |        |        |
| 33    | 4967.3    | 39.533  | 11.4   |       |           |        |        |
| 34    | 3757.8    | 29.906  | 7.8    |       |           |        |        |
| 35    | 3221.4    | 25.638  | 20.3   |       |           |        |        |
| 36    | 3130.7    | 24.916  | 18.7   |       |           |        |        |
| 37    | 3108.3    | 24.738  | 15.4   |       |           |        |        |
| 38    | 2297.0    | 18.281  | 20.4   |       |           |        |        |
| 39    | 2182.1    | 17.366  | 29.8   |       |           |        |        |

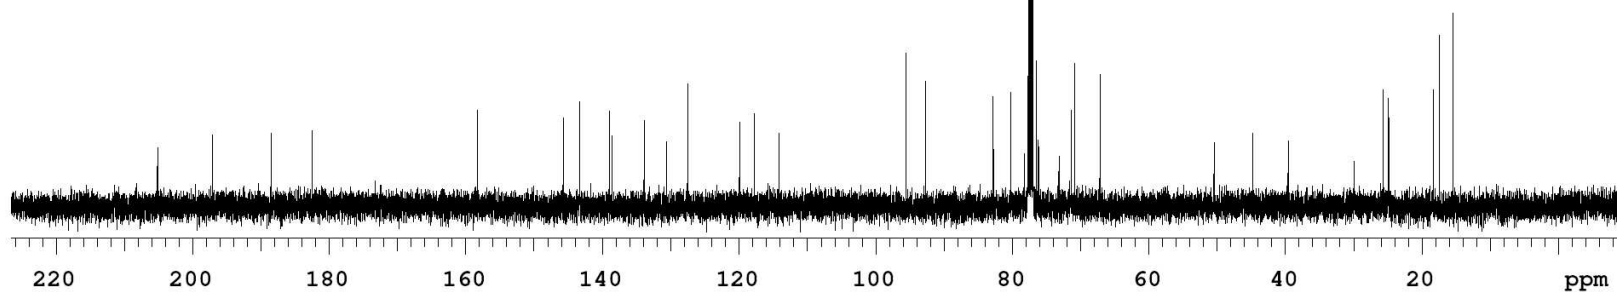

Figure S13: <sup>13</sup>C NMR spectrum (CDCl<sub>3</sub>, 125 MHz) of saquayamycin G (1)

KS\_KY40-1\_F3A\_gCOSY\_CDC13\_11\_21\_2010  
CDC13, 500 MHz, nt=4, time=1:20 hrs  
Khaled A. Shaaban

Sample: Khaled\_A\_Shaaban

File: xp

Pulse Sequence: gCOSY

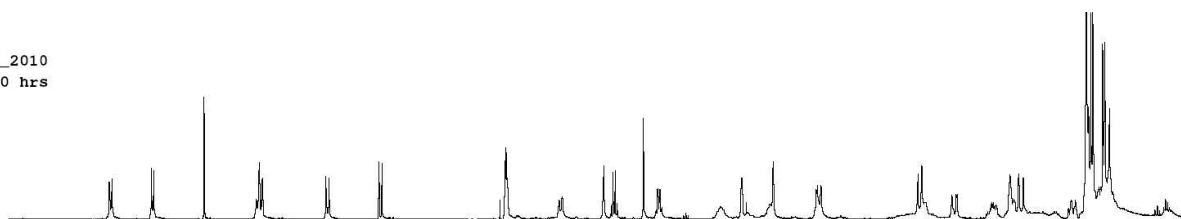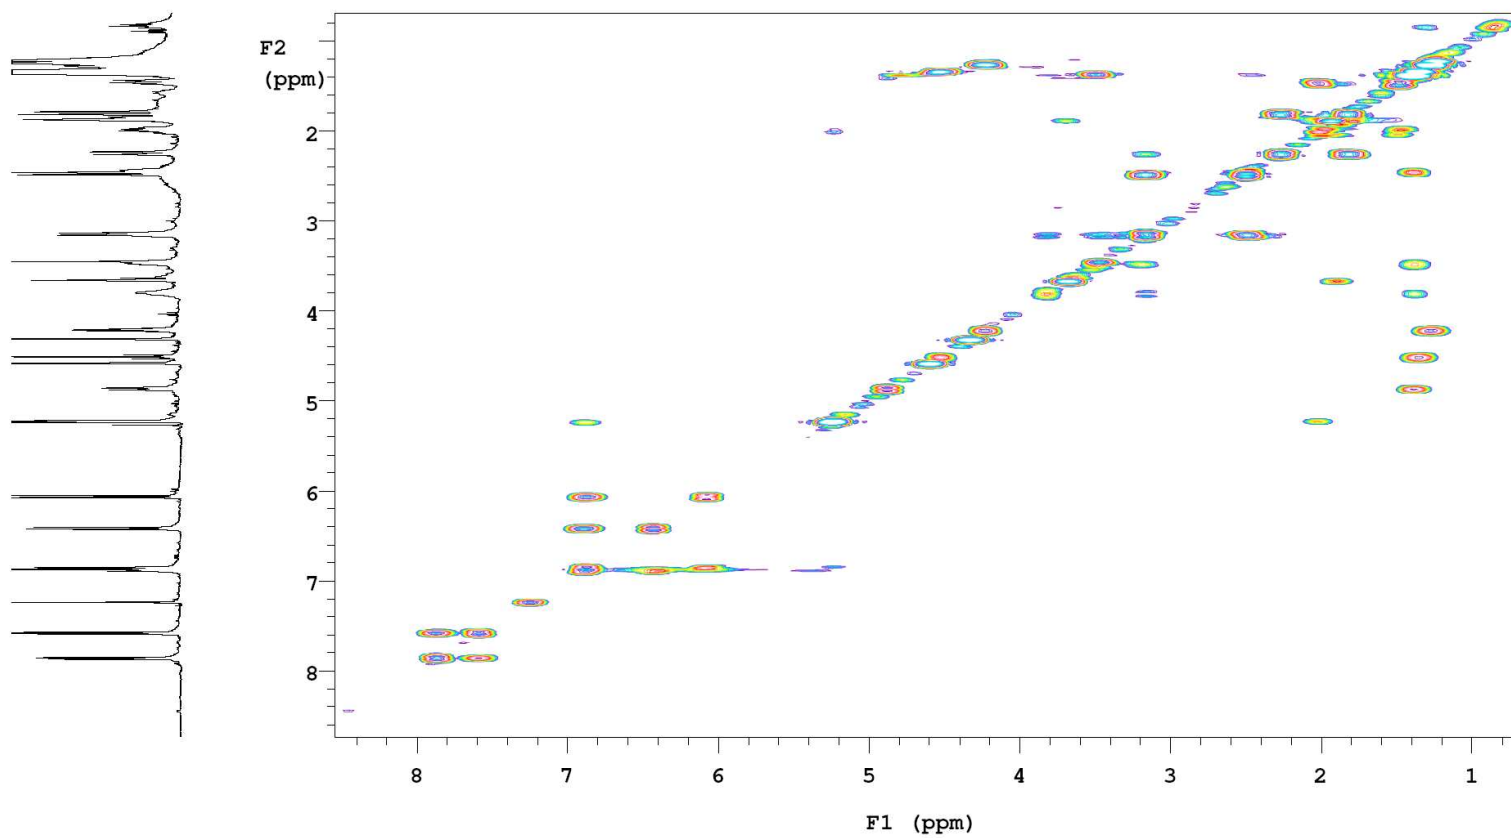

**Figure S14:** <sup>1</sup>H-<sup>1</sup>H COSY spectrum (CDCl<sub>3</sub>, 500 MHz) of saquayamycin G (**1**)

KS\_KY40-1\_F3A\_gHSQC\_CDCl3\_11\_20\_2010  
CDCl3, 500 MHz, nt=8, time=5 hrs  
Khaled A. Shaaban

Sample: Khaled\_A\_Shaaban  
File: xp

Pulse Sequence: gHSQC

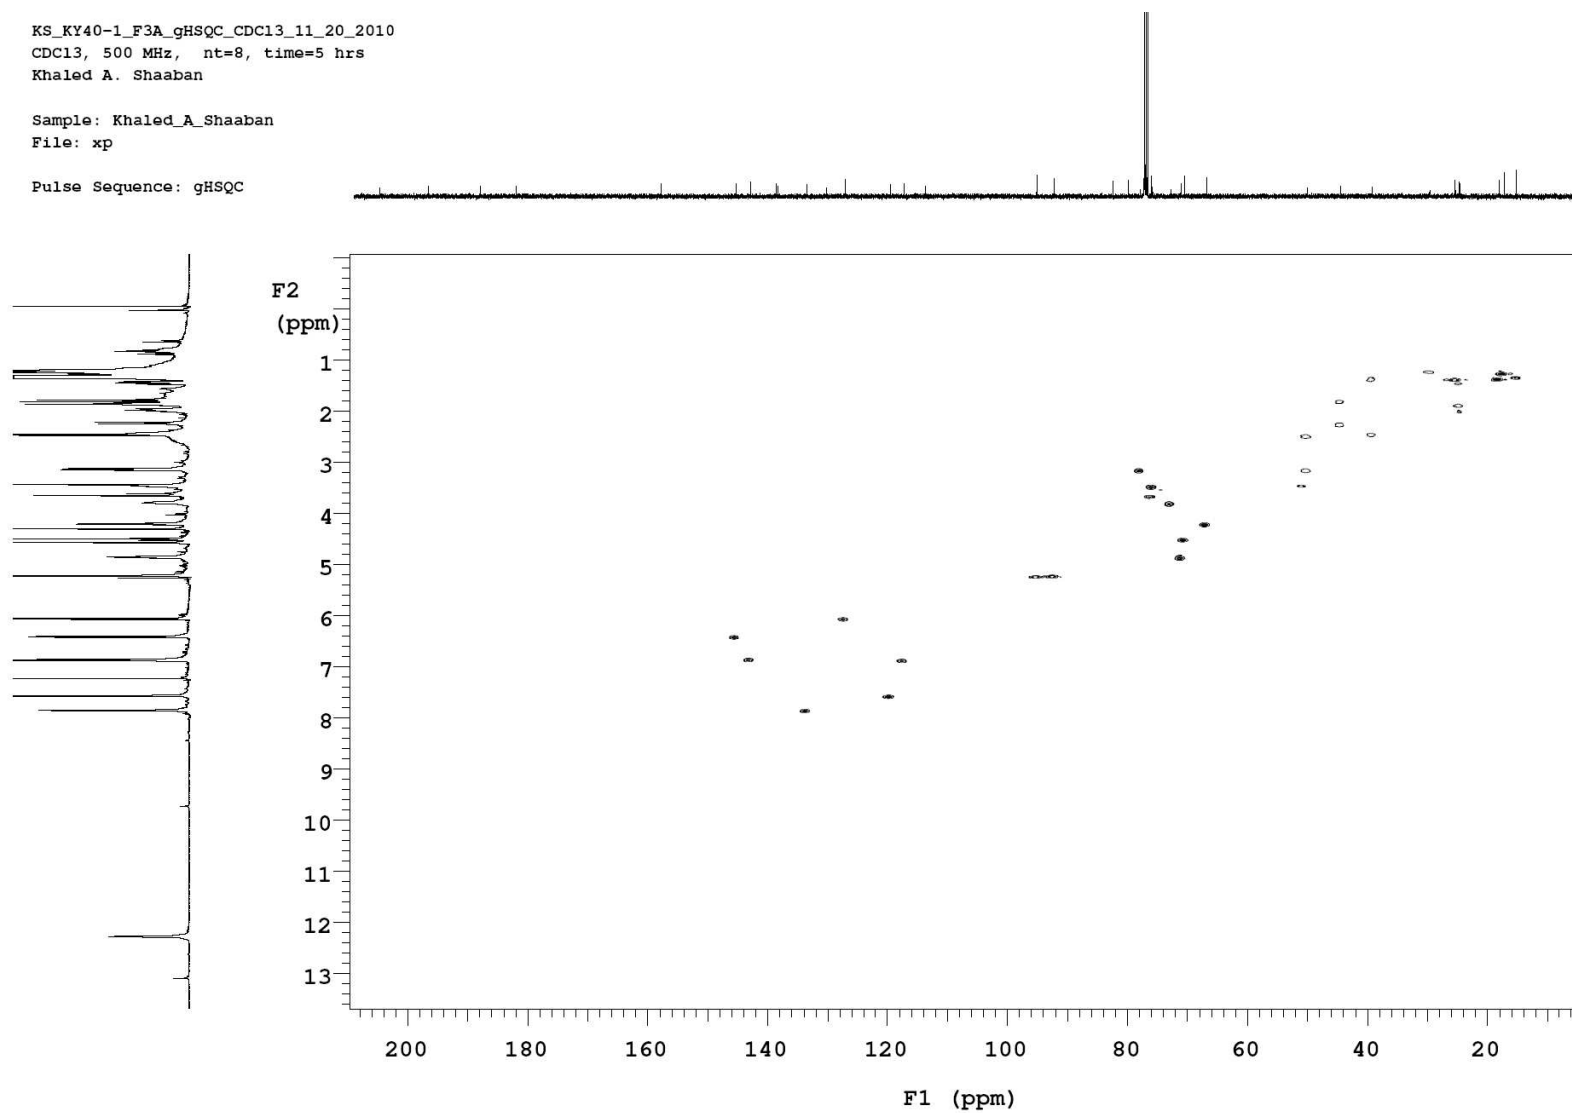

**Figure S15:** HSQC spectrum (CDCl<sub>3</sub>, 500 MHz) of saquayamycin G (**1**)



KS\_KY40-1\_F3A\_gHMBC\_CDC13\_11\_21\_2010  
CDC13, 500 MHz, nt=32, time=11 hrs  
Khaled A. Shaaban

Sample: Khaled\_A\_Shaaban  
File: xp

Pulse Sequence: gHMBC

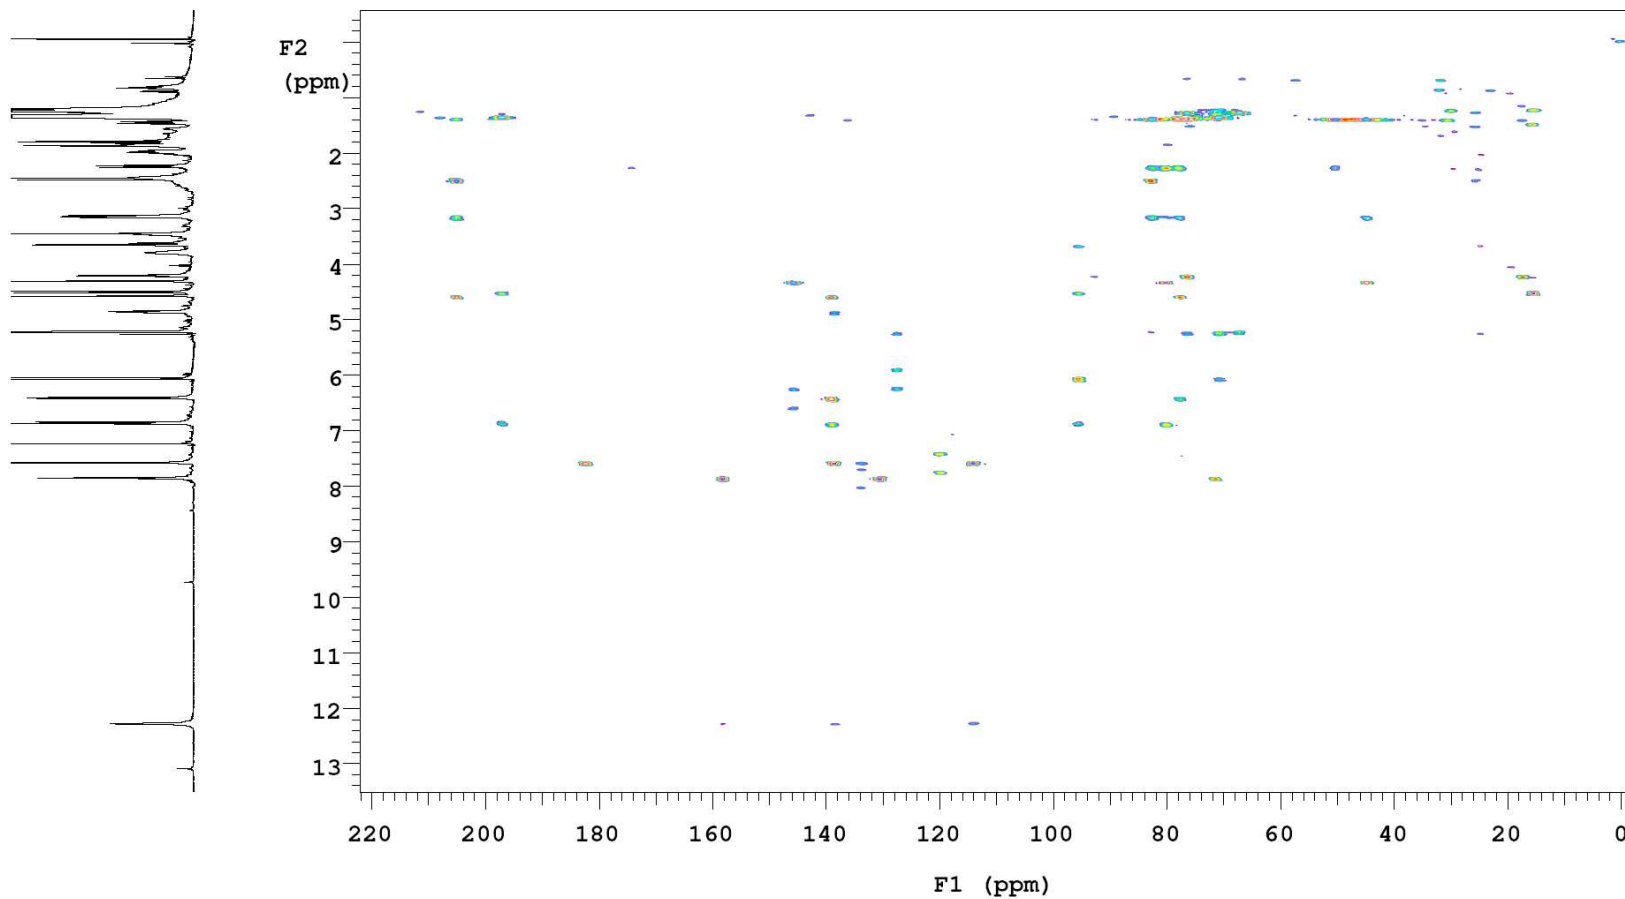

**Figure S16:** HMBC spectrum (CDCl<sub>3</sub>, 500 MHz) of saquayamycin G (1)

KS\_KY40-1\_F3A\_NOESY\_CDCl3\_11\_21\_2010  
CDCl3, 500 MHz, nt=4, time=4:33 hrs  
Khaled A. Shaaban

Sample: Khaled\_A\_Shaaban  
File: home/khaled/vnmrsys/data/KS\_KY40-1\_F3A\_NOESY\_CDCl3\_11\_21\_2010.fid

Pulse Sequence: NOESY

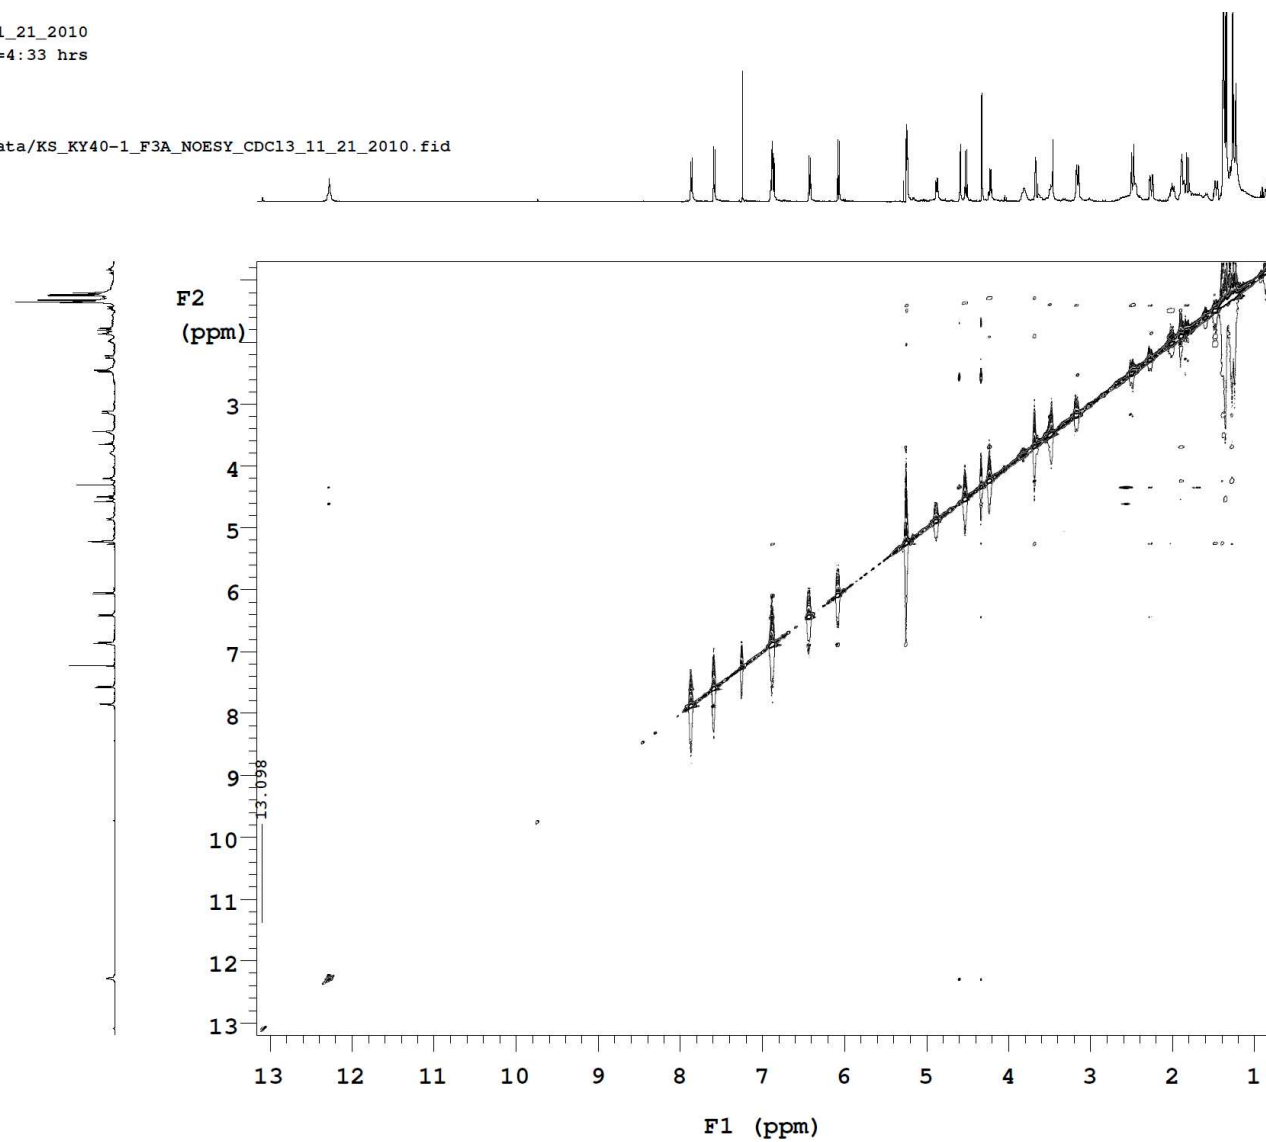

**Figure S17:** NOESY spectrum (CDCl<sub>3</sub>, 500 MHz) of saquayamycin G (1)

■ -TOF MS: 2.508 to 2.617 min from KSKY40-1-F4D2.wiff Agilent

Max. 1.5e5 count

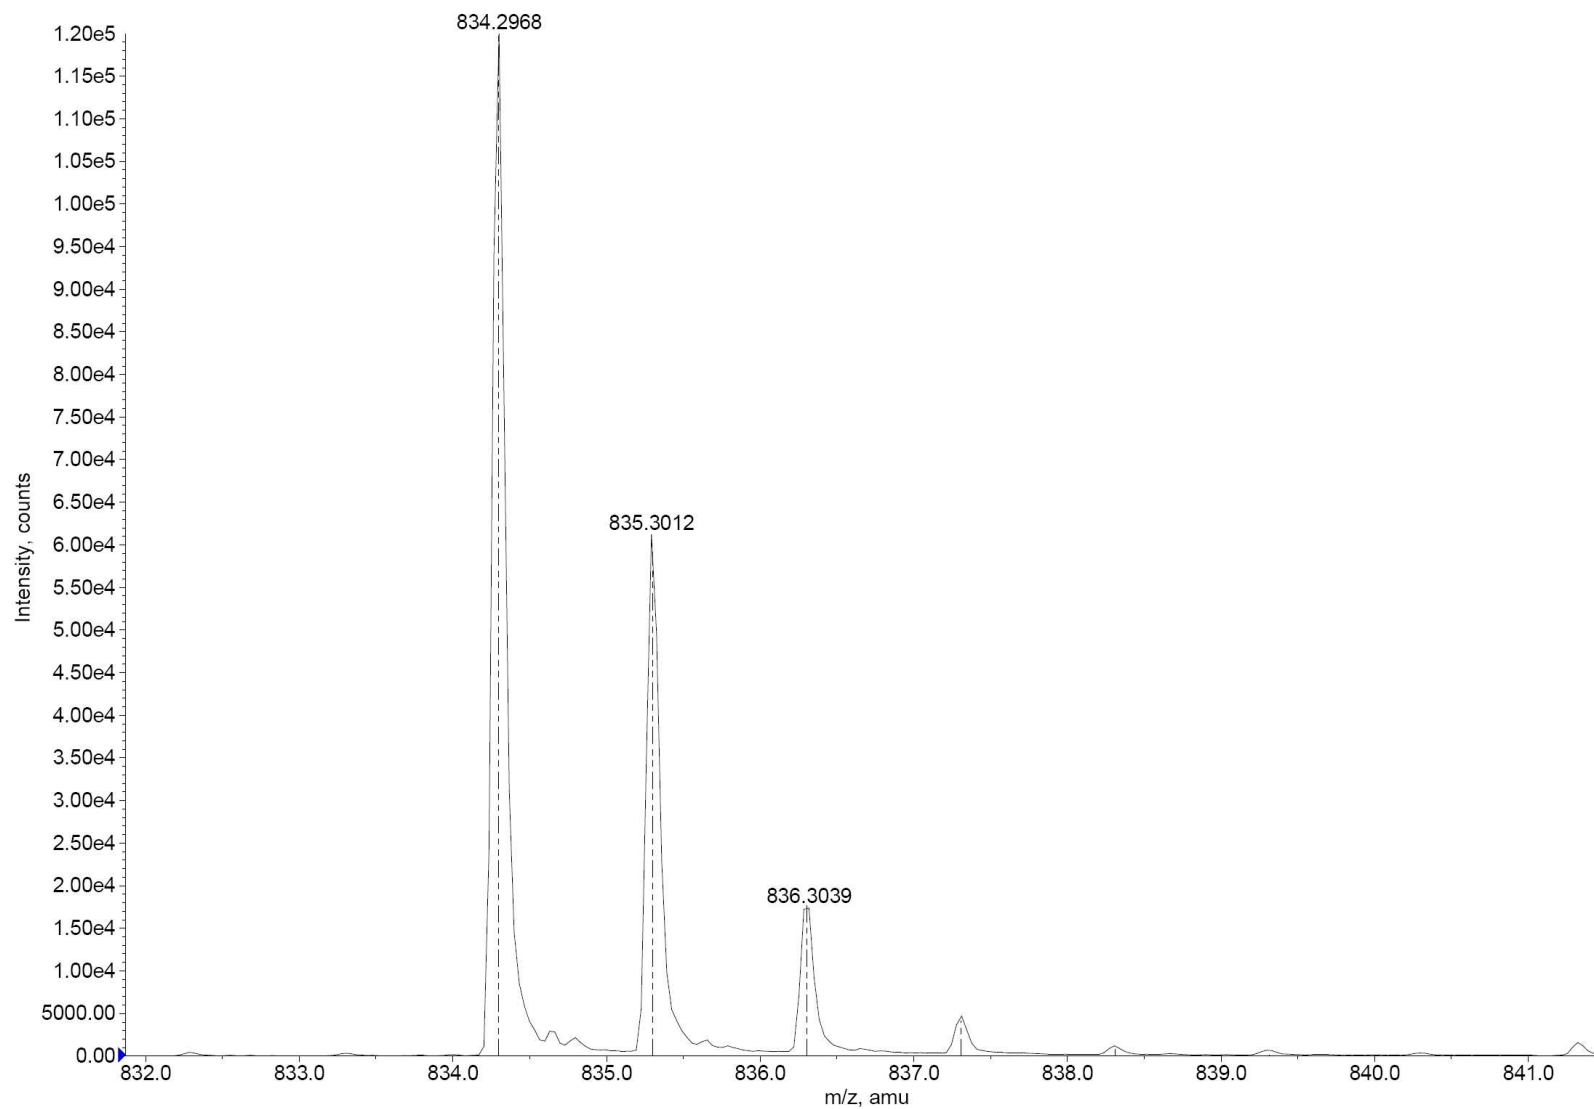

**Figure S18:** (-)-HRESI-MS spectrum of saquayamycin H (**2**)

■ -TOF MS: 2.508 to 2.617 min from KSKY40-1-F4D2.wiff Agilent

Max. 1.5e5 counts.

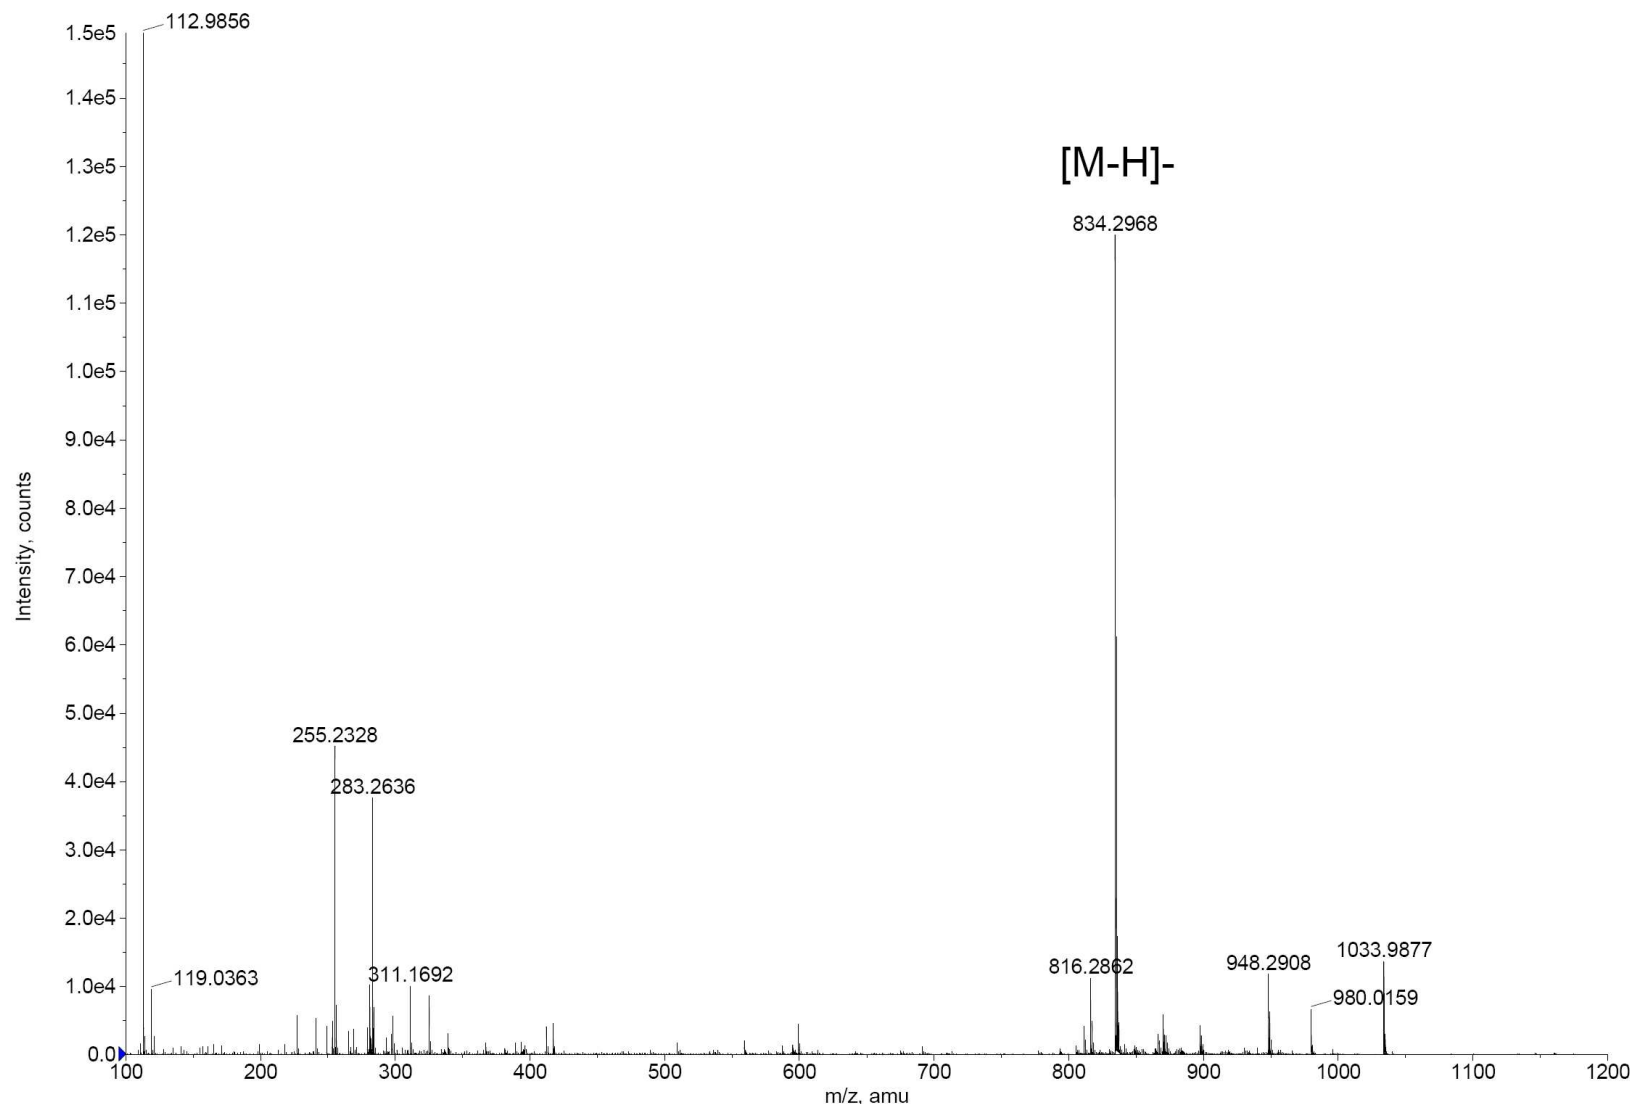

**Figure S19:** (-)-HRESI-MS spectrum of saquayamycin H (2)

KS\_KY40-1\_F4D2\_1HNMR\_CDCl3\_11\_24\_2010  
CDC13, 500 MHz, nt=32  
Khaled A. Shaaban

Sample: Khaled\_A\_Shaaban  
File: xp  
Pulse Sequence: s2pul

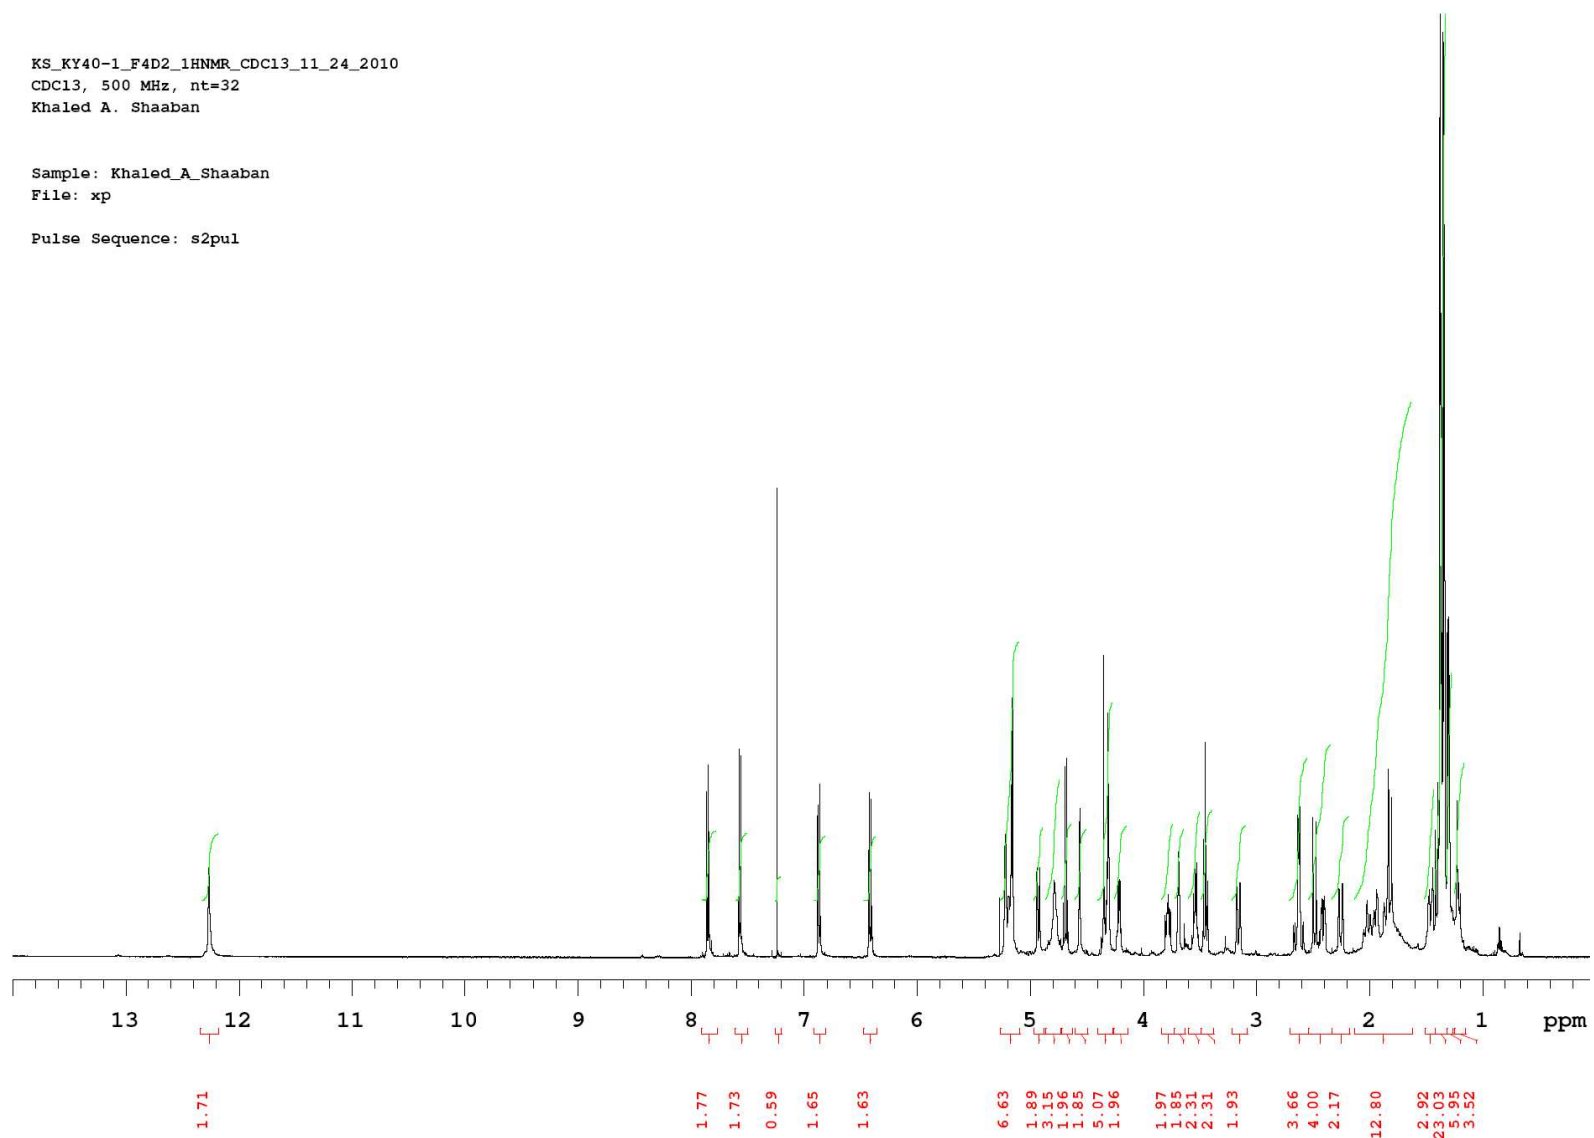

**Figure S20:** <sup>1</sup>H NMR spectrum (CDCl<sub>3</sub>, 500 MHz) of saquayamycin H (2)

KS\_KY40-1\_F4D2\_13CNMR\_CDCl3\_11\_25\_2010  
 CDC13, 125 MHz, time= 15 hrs  
 Khaled A. Shaaban

exp2 Carbon

| SAMPLE      |             | SPECIAL    |          |
|-------------|-------------|------------|----------|
| date        | Nov 24 2010 | temp       | not used |
| solvent     | cdcl3       | gain       | 30       |
| file        | exp         | spin       | 20       |
| ACQUISITION |             |            |          |
|             |             | hst        | 0.008    |
| sw          | 30487.8     | pw90       | 11.900   |
| at          | 1.300       | alfa       | 10.000   |
| np          | 79298       | FLAGS      |          |
| fb          | 17000       | il         | n        |
| bs          | 64          | in         | n        |
| d1          | 1.000       | dp         | y        |
| nt          | 64000       | hs         | nn       |
| ct          | 24256       | PROCESSING |          |
| TRANSMITTER |             | lb         | 0.50     |
| tn          | C13         | fn         | not used |
| sfrq        | 125.665     | DISPLAY    |          |
| tof         | 1285.1      | sp         | -1023.6  |
| tpwr        | 59          | wp         | 29483.9  |
| pw          | 5.950       | rfl        | 11730.7  |
| DECOUPLER   |             | rfp        | 9704.1   |
| dn          | H1          | rp         | -90.6    |
| dof         | 0           | lp         | 52.1     |
| dm          | YYY         | PLOT       |          |
| dmm         | w           | wc         | 250      |
| dpwr        | 35          | sc         | 0        |
| dmf         | 11448       | vs         | 893299   |
|             |             | th         | 7        |
|             |             | ai         | cdc ph   |

| INDEX | FREQUENCY | PPM     | HEIGHT | INDEX | FREQUENCY | PPM    | HEIGHT |
|-------|-----------|---------|--------|-------|-----------|--------|--------|
| 1     | 26144.9   | 208.075 | 10.1   | 40    | 3219.1    | 25.619 | 25.5   |
| 2     | 25787.2   | 205.228 | 10.1   | 41    | 3124.2    | 24.864 | 18.9   |
| 3     | 24523.2   | 195.169 | 12.0   | 42    | 3113.5    | 24.779 | 17.0   |
| 4     | 23668.2   | 188.364 | 22.7   | 43    | 2227.7    | 17.729 | 32.0   |
| 5     | 22922.4   | 182.429 | 17.7   | 44    | 2217.0    | 17.644 | 38.5   |
| 6     | 19988.8   | 159.082 | 10.2   | 45    | 2055.6    | 16.359 | 42.3   |
| 7     | 19863.2   | 158.082 | 31.3   | 46    | 2015.1    | 16.037 | 28.0   |
| 8     | 18320.6   | 145.805 | 23.2   |       |           |        |        |
| 9     | 17464.6   | 138.993 | 22.9   |       |           |        |        |
| 10    | 17460.0   | 138.956 | 14.0   |       |           |        |        |
| 11    | 17349.3   | 138.075 | 22.4   |       |           |        |        |
| 12    | 16817.5   | 133.843 | 23.3   |       |           |        |        |
| 13    | 16420.2   | 130.681 | 18.2   |       |           |        |        |
| 14    | 15059.0   | 119.848 | 18.6   |       |           |        |        |
| 15    | 14783.2   | 117.652 | 19.1   |       |           |        |        |
| 16    | 14341.7   | 114.139 | 19.2   |       |           |        |        |
| 17    | 12238.0   | 97.397  | 13.1   |       |           |        |        |
| 18    | 12146.4   | 96.667  | 22.5   |       |           |        |        |
| 19    | 11638.4   | 92.624  | 27.6   |       |           |        |        |
| 20    | 11501.6   | 91.536  | 20.6   |       |           |        |        |
| 21    | 10405.6   | 82.813  | 22.6   |       |           |        |        |
| 22    | 10073.9   | 80.173  | 25.2   |       |           |        |        |
| 23    | 9793.4    | 77.941  | 21.6   |       |           |        |        |
| 24    | 9756.2    | 77.645  | 39.9   |       |           |        |        |
| 25    | 9735.7    | 77.482  | 380.8  |       |           |        |        |
| 26    | 9704.1    | 77.230  | 386.5  |       |           |        |        |
| 27    | 9672.0    | 76.975  | 386.2  |       |           |        |        |
| 28    | 9656.1    | 76.849  | 26.1   |       |           |        |        |
| 29    | 9634.7    | 76.678  | 24.9   |       |           |        |        |
| 30    | 9387.7    | 74.712  | 30.6   |       |           |        |        |
| 31    | 9379.3    | 74.646  | 29.2   |       |           |        |        |
| 32    | 8998.3    | 71.614  | 28.4   |       |           |        |        |
| 33    | 8959.7    | 71.306  | 23.3   |       |           |        |        |
| 34    | 8862.5    | 70.532  | 16.7   |       |           |        |        |
| 35    | 8448.0    | 67.234  | 26.4   |       |           |        |        |
| 36    | 6313.2    | 50.243  | 14.3   |       |           |        |        |
| 37    | 5629.3    | 44.801  | 14.7   |       |           |        |        |
| 38    | 5045.0    | 40.151  | 17.7   |       |           |        |        |
| 39    | 4633.8    | 36.878  | 21.2   |       |           |        |        |

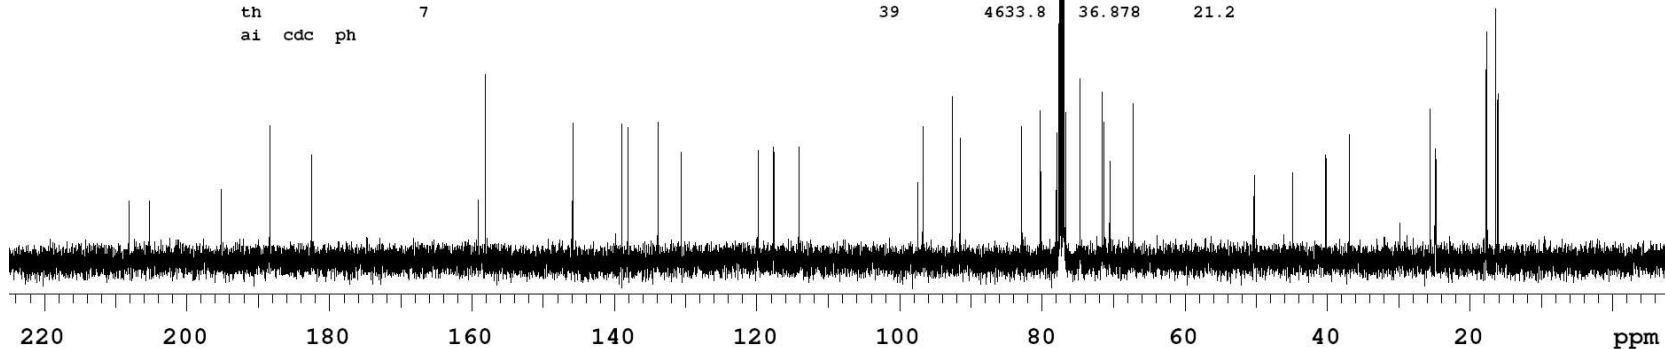

Figure S21:  $^{13}\text{C}$  NMR spectrum ( $\text{CDCl}_3$ , 125 MHz) of saquayamycin H (2)

KS\_KY40-1\_F4D2\_gCOSY\_CDC13\_11\_24\_2010  
CDC13, 500 MHz, nt=4, time=1:20 hrs  
Khaled A. Shaaban

Sample: Khaled\_A\_Shaaban

File: xp

Pulse Sequence: gCOSY

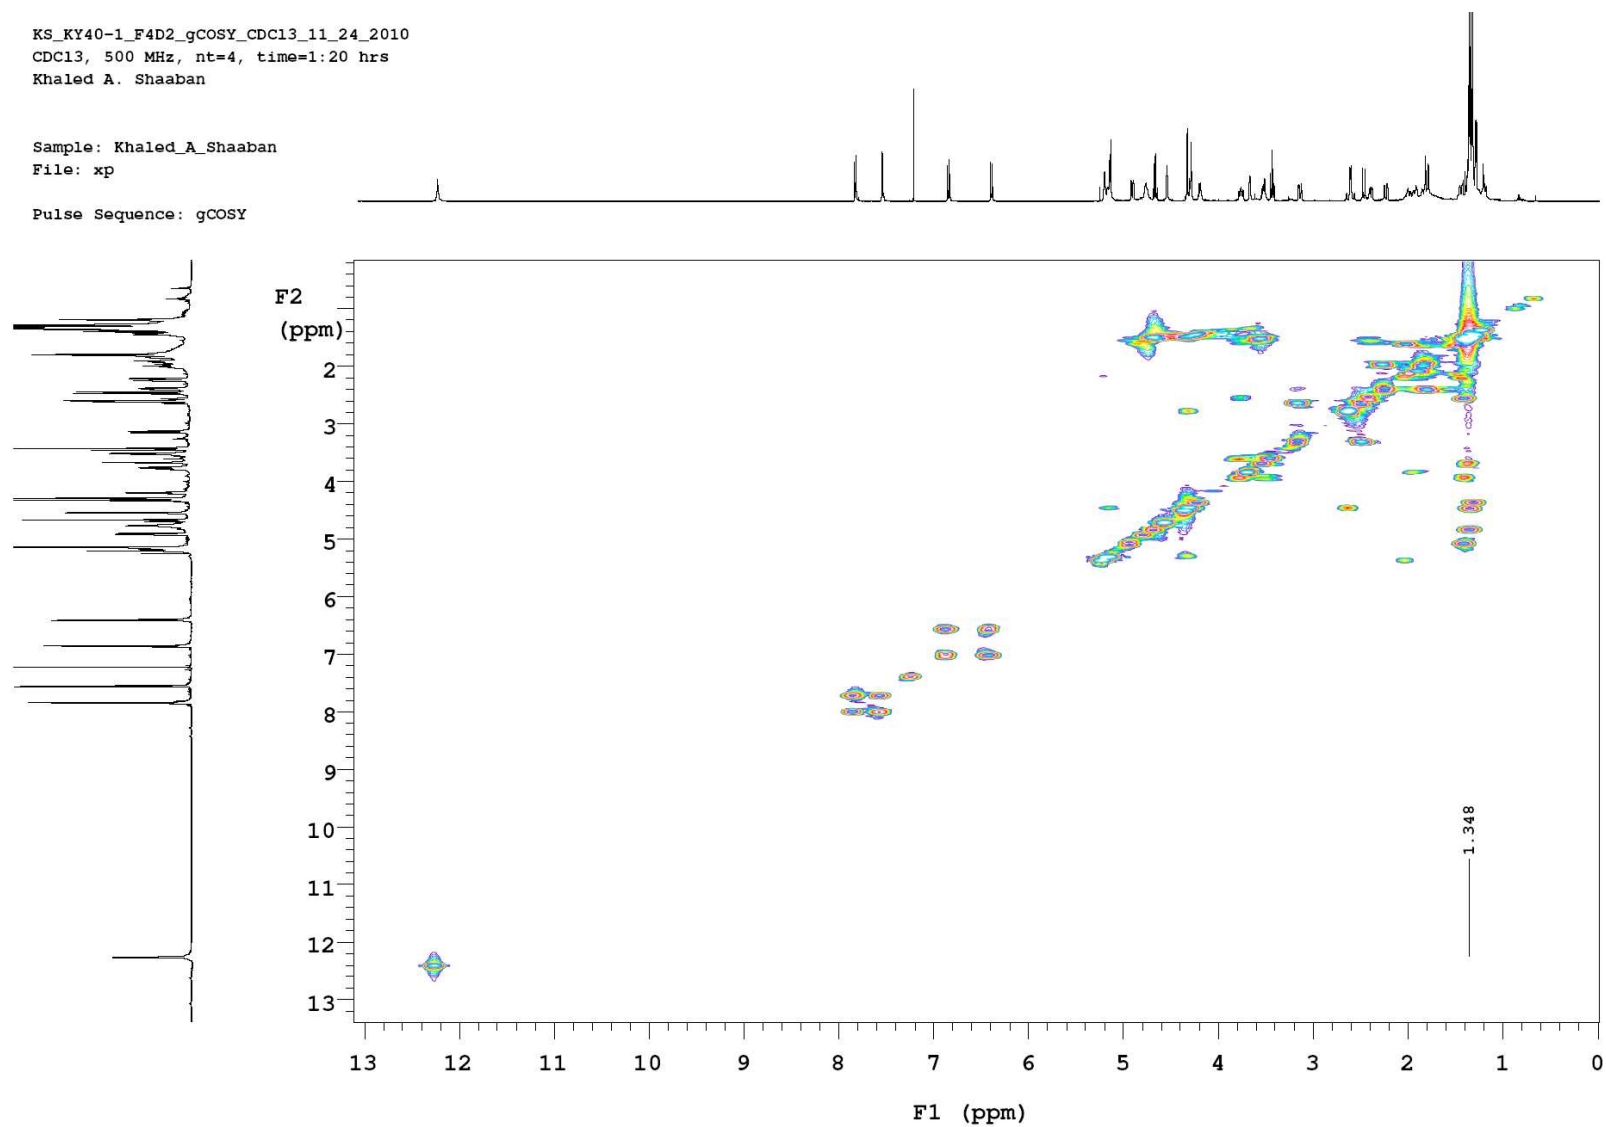

**Figure S22:**  $^1\text{H}$ - $^1\text{H}$  COSY spectrum ( $\text{CDCl}_3$ , 500 MHz) of saquayamycin H (**2**)

KS\_KY40-1\_F4D2\_GHSQC\_CDC13\_11\_25\_2010  
CDC13, 500 MHz, nt=8, time= 5:30 hrs  
Khaled A. Shaaban

Sample: Khaled\_A\_Shaaban  
File: xp

Pulse Sequence: gHSQC

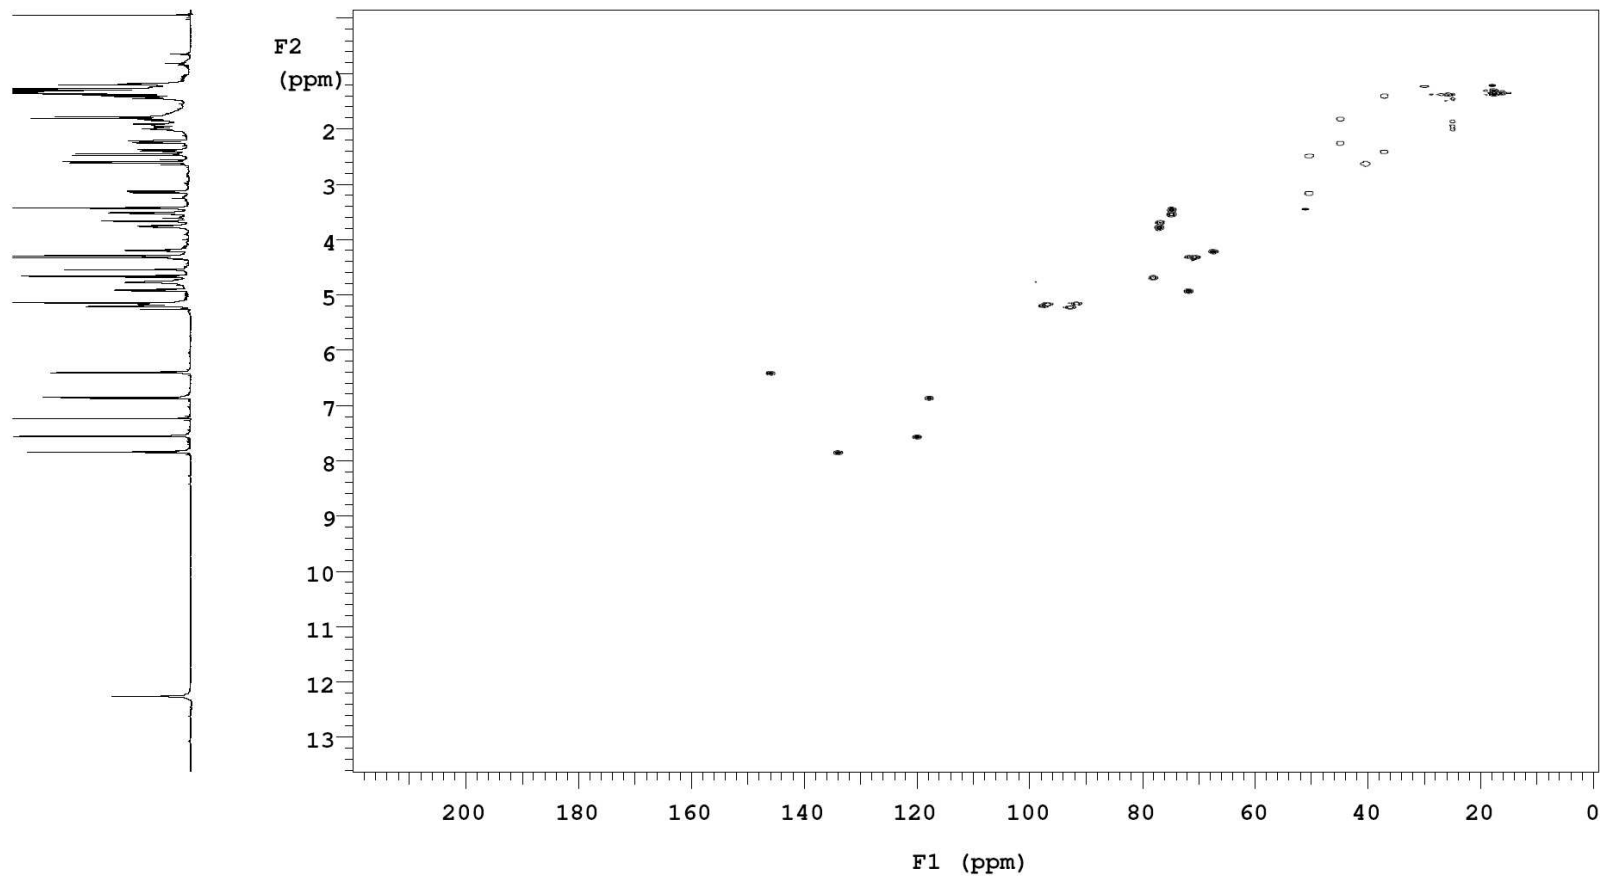

Figure S23: HSQC spectrum (CDCl<sub>3</sub>, 500 MHz) of saquayamycin H (2)



KS\_KY40-1\_F4D2\_GHMBC\_CDCl3\_11\_26\_2010  
CDC13, 500 MHz, nt=32, time= 11:10 hrs  
Khaled A. Shaaban

Sample: Khaled\_A\_Shaaban

File: xp

Pulse Sequence: gHMBC

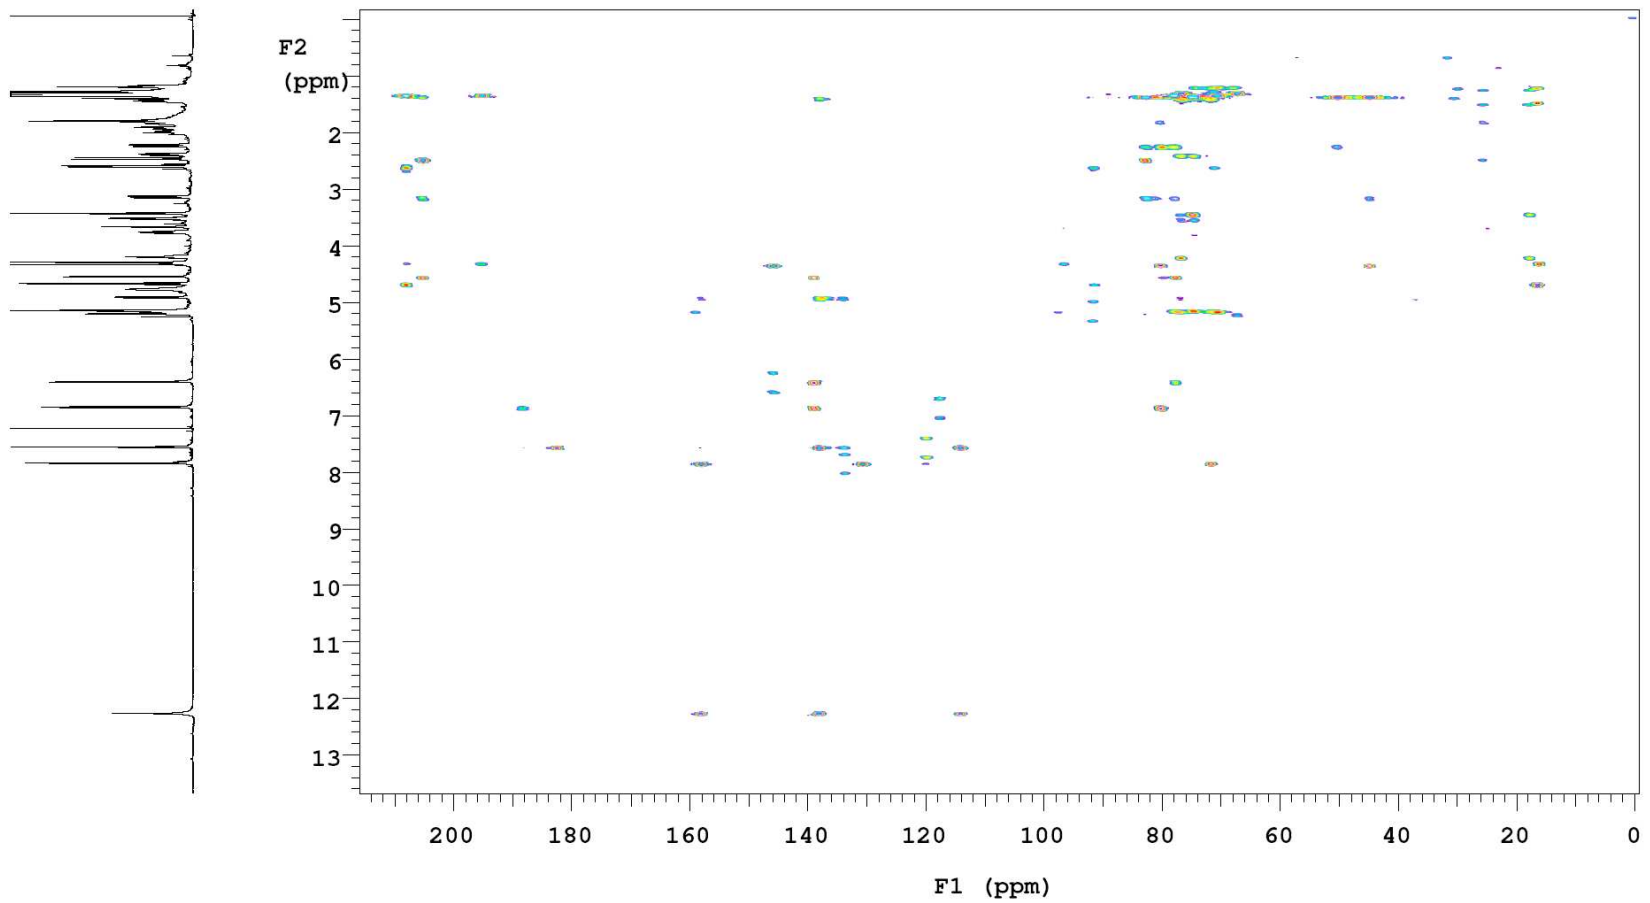

**Figure S24:** HMBC spectrum (CDCl<sub>3</sub>, 500 MHz) of saquayamycin H (2)

KS\_KY40-1\_F4D2\_NOESY\_CDC13\_11\_26\_2010  
CDC13, 500 MHz, nt=4, time=4:34 hrs  
Khaled A. Shaaban

Sample: Khaled\_A\_Shaaban

File: xp

Pulse Sequence: NOESY

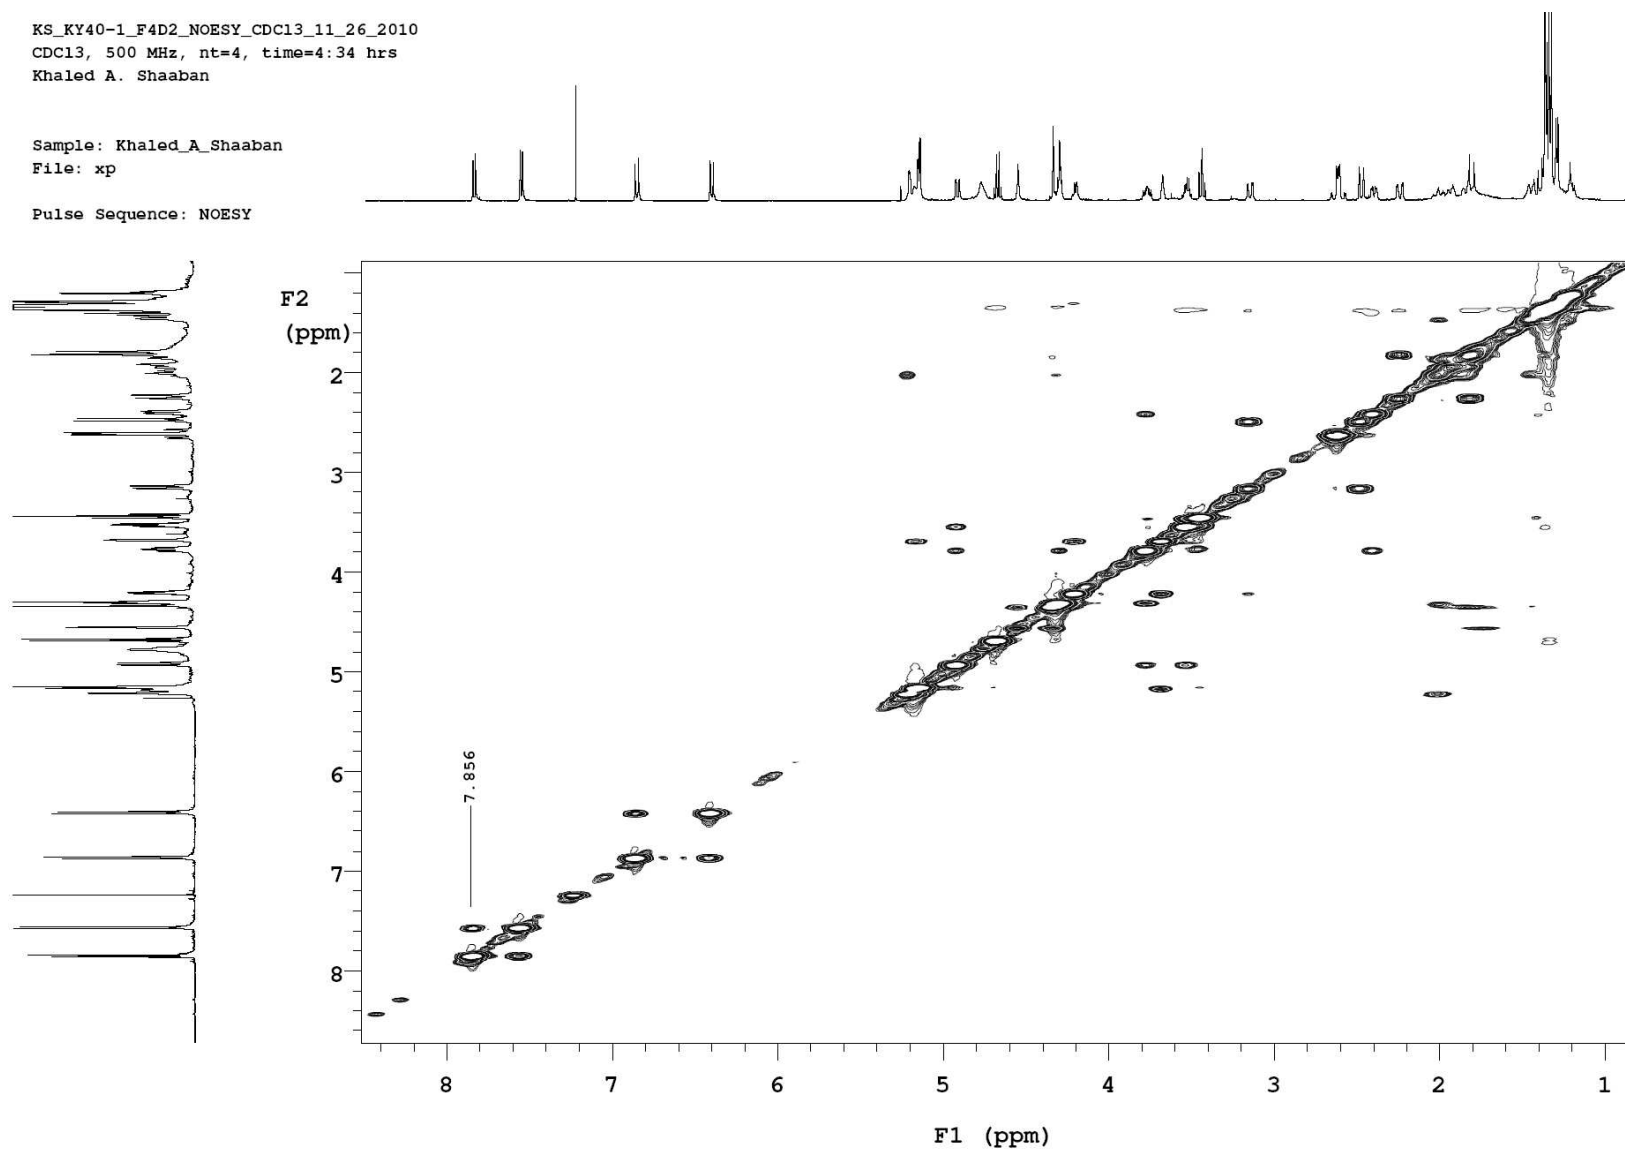

**Figure S25:** NOESY spectrum (CDCl<sub>3</sub>, 500 MHz) of saquayamycin H (2)

KS\_KY40-1\_F4C2\_1HNMR\_Acetone\_11\_24\_2010  
CDC13, 500 MHz, nt=32  
Khaled A. Shaaban

Sample: khaled\_A\_Shaaban  
File: xp

Pulse Sequence: s2pul

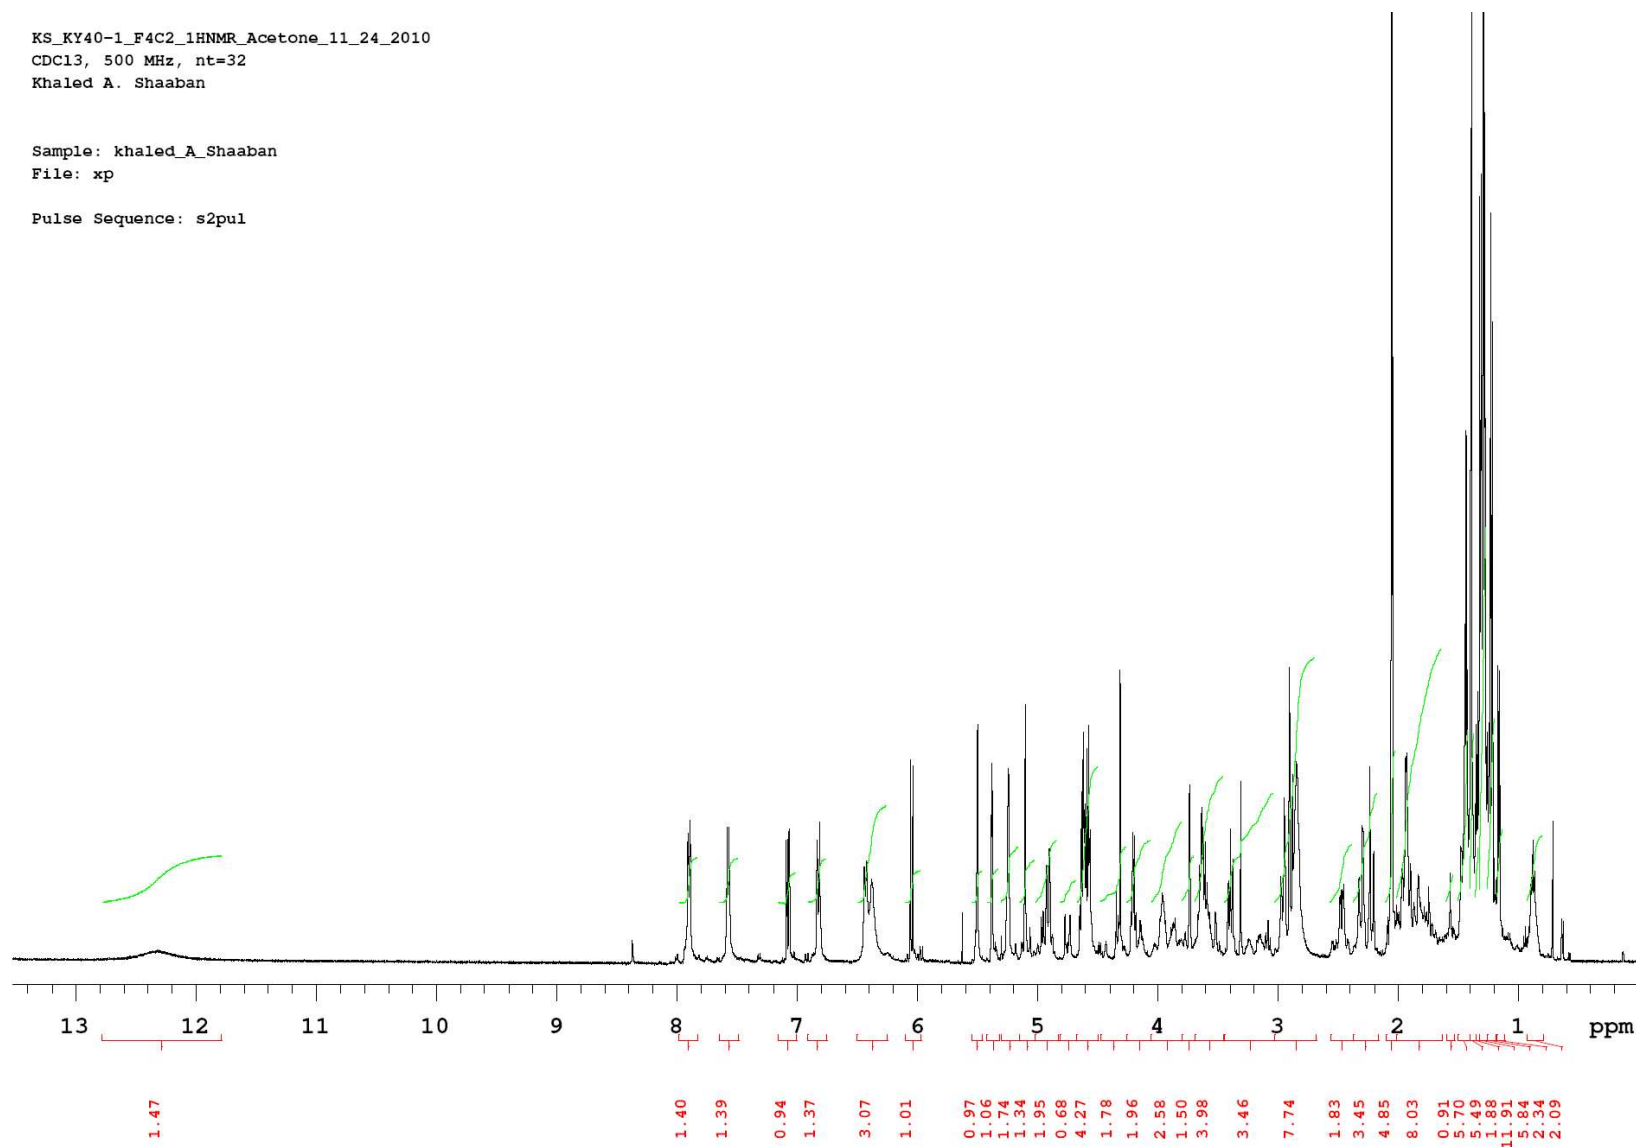

**Figure S26:**  $^1\text{H}$  NMR spectrum (acetone- $d_6$ , 500 MHz) of saquayamycin I (**3**)

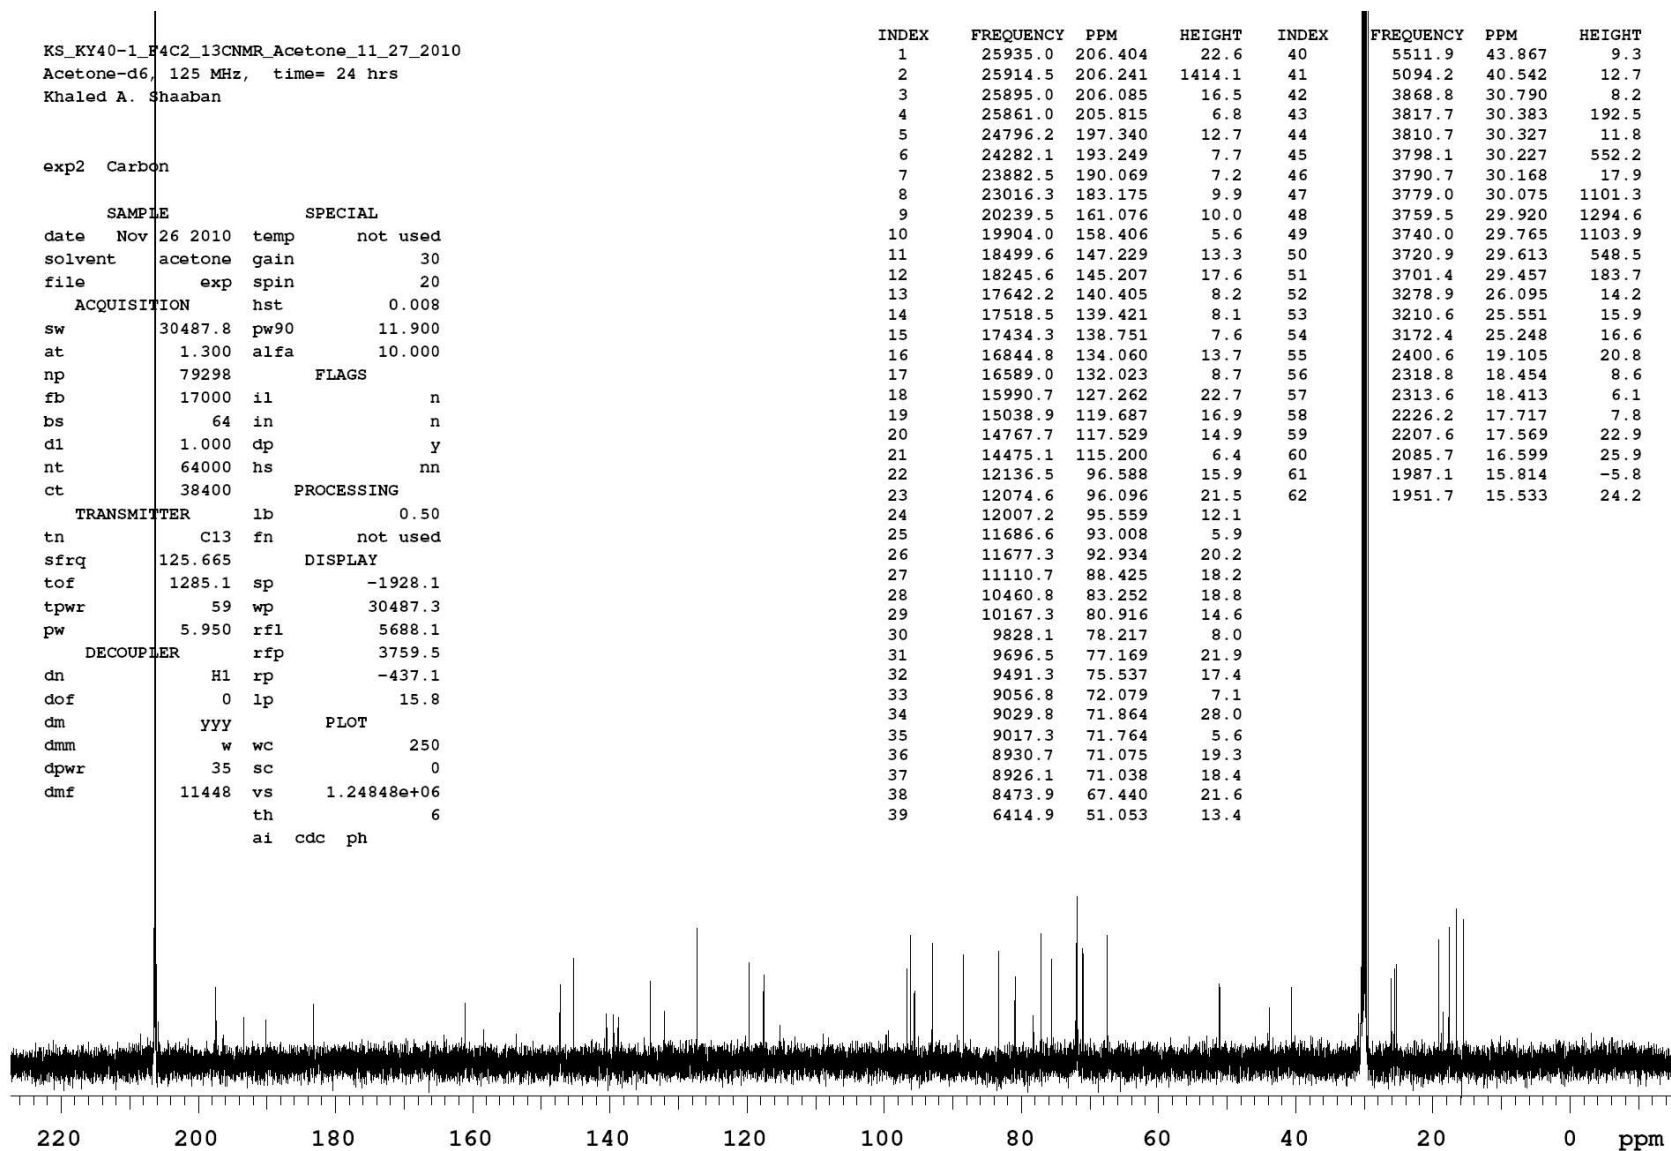

Figure S27: <sup>13</sup>C NMR spectrum (acetone-d<sub>6</sub>, 125 MHz) of saquayamycin I (3)

KS\_KY40-1\_F4C2\_gCOSY\_Acetone\_11\_29\_2010  
Acetone-d6, 500 MHz, nt=4, time=1:25 hrs  
Khaled A. Shaaban

Sample: Khaled\_A\_Shaaban  
File: xp

Pulse Sequence: gCOSY

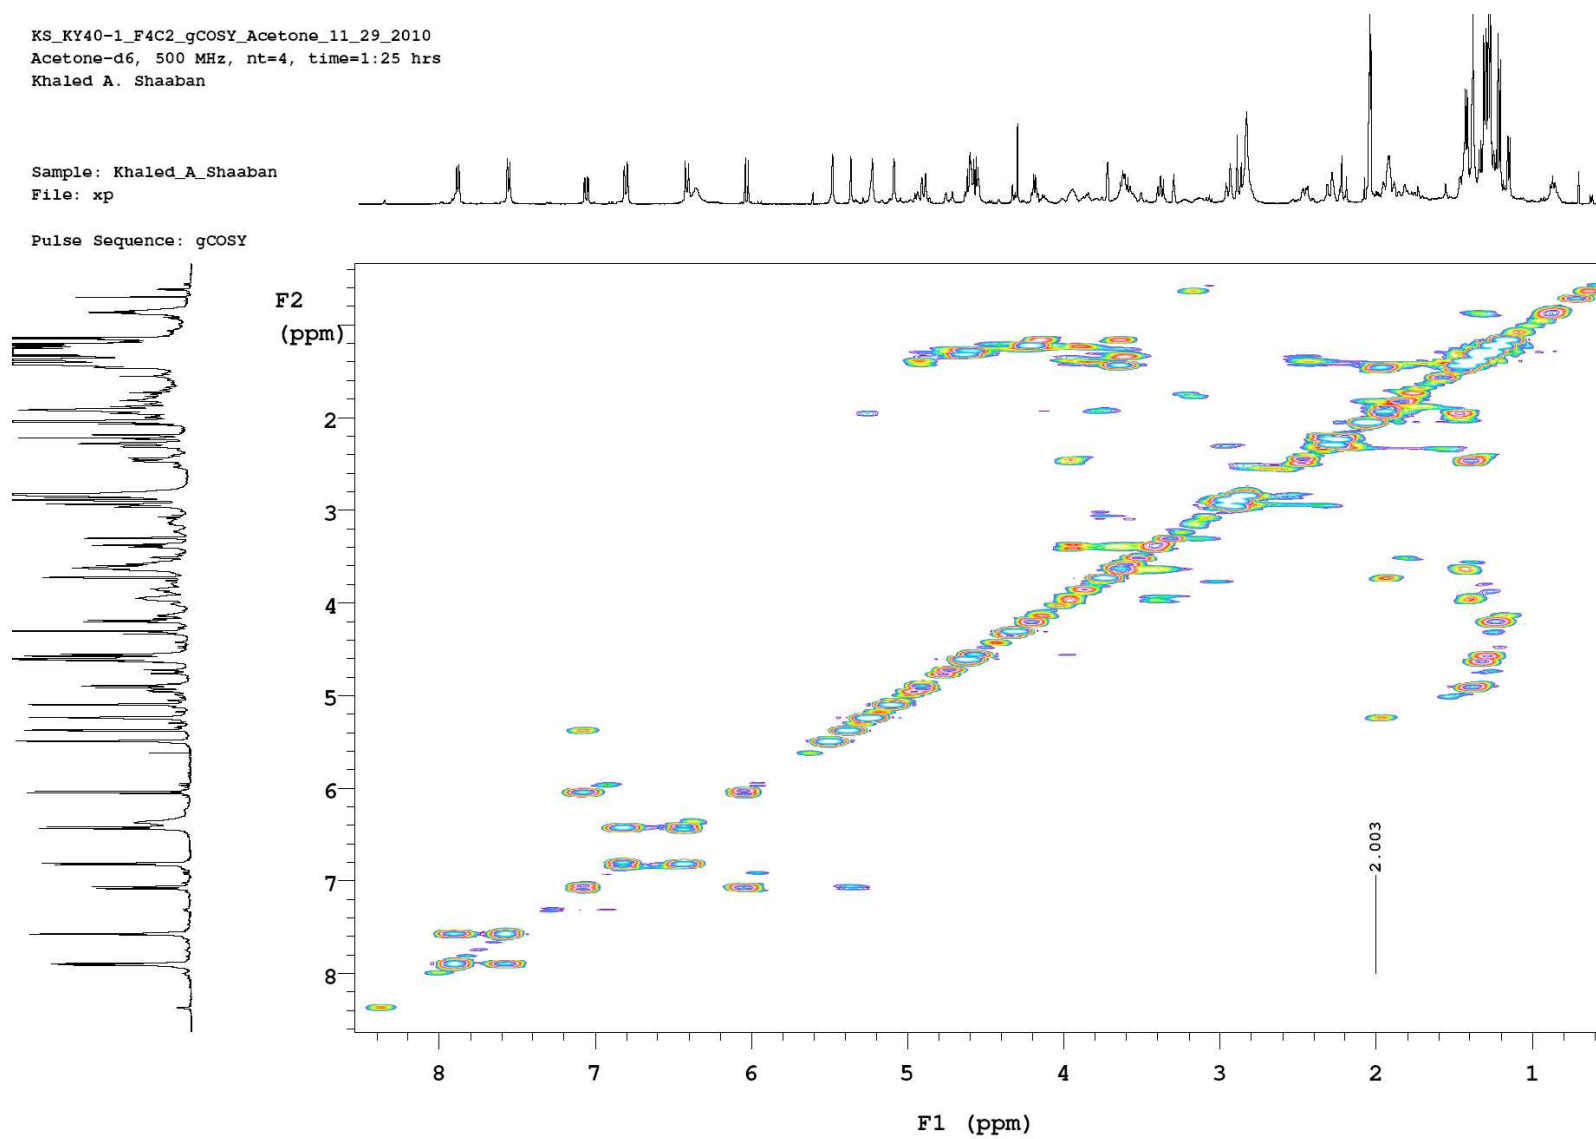

Figure S28:  $^1\text{H}$ - $^1\text{H}$  COSY spectrum (acetone- $d_6$ , 500 MHz) of saquayamycin I (3)

KS\_KY40-1\_F4C2\_GHSQC\_Acetone\_11\_28\_2010  
Acetone-d<sub>6</sub>, 500 MHz, nt=8, time=5:30 hrs  
Khaled A. Shaaban

Sample: Khaled\_A\_Shaaban  
File: xp

Pulse Sequence: gHSQC

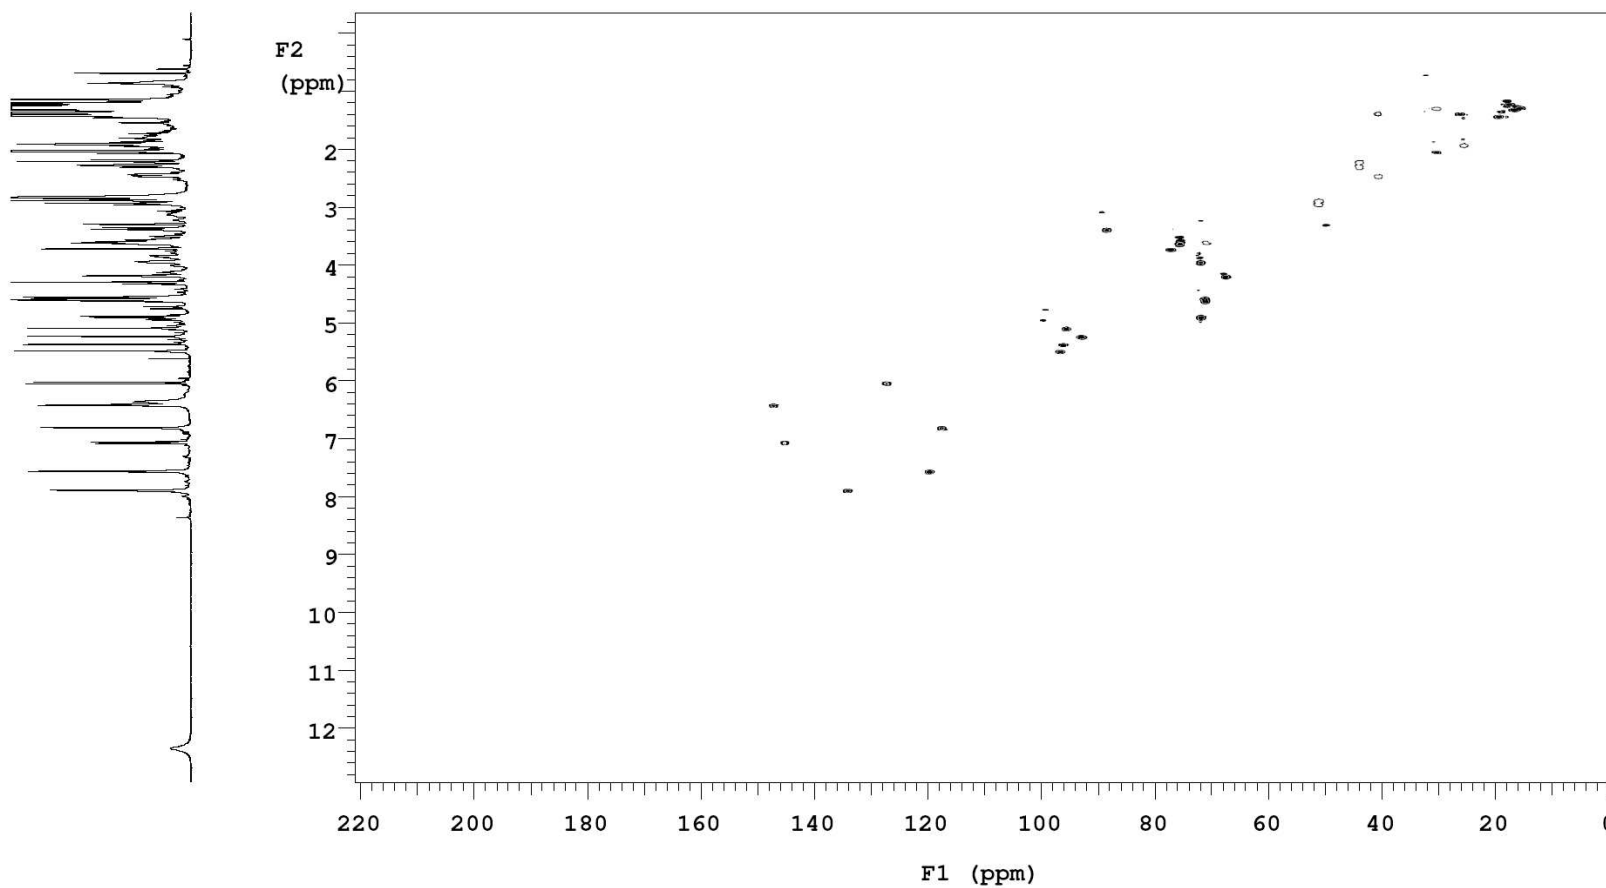

**Figure S29:** HSQC spectrum (acetone-*d*<sub>6</sub>, 500 MHz) of saquayamycin I (**3**)

KS\_KY40-1\_F4C2\_GHMBC\_Acetone\_11\_28\_2010  
Acetone-d6, 500 MHz, nt=12, time=11:14 hrs  
Khaled A. Shaaban

Sample: Khaled\_A\_Shaaban  
File: xp

Pulse Sequence: gHMBC

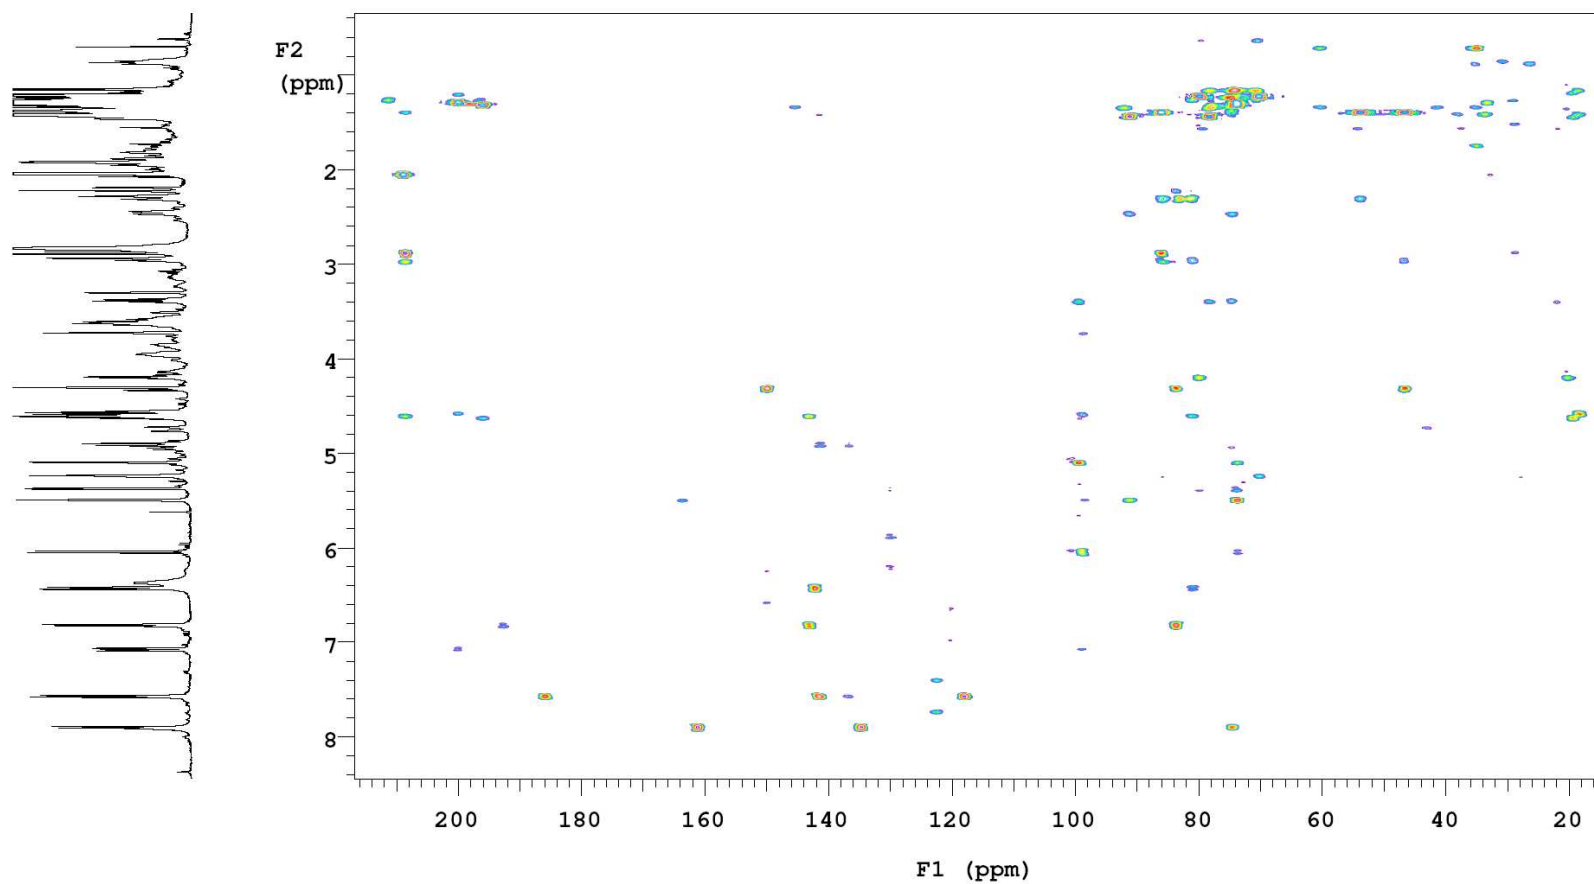

**Figure S30:** HMBC spectrum (acetone-*d*<sub>6</sub>, 500 MHz) of saquayamycin I (**3**)

KS\_KY40-1\_F4C2\_NOESY\_Acetone\_12\_01\_2010  
Acetone-d<sub>6</sub>, 500 MHz, nt=8, time=9:10 hrs  
Khaled A. Shaaban

Sample: Khaled\_A\_Shaaban  
File: xp

Pulse Sequence: NOESY

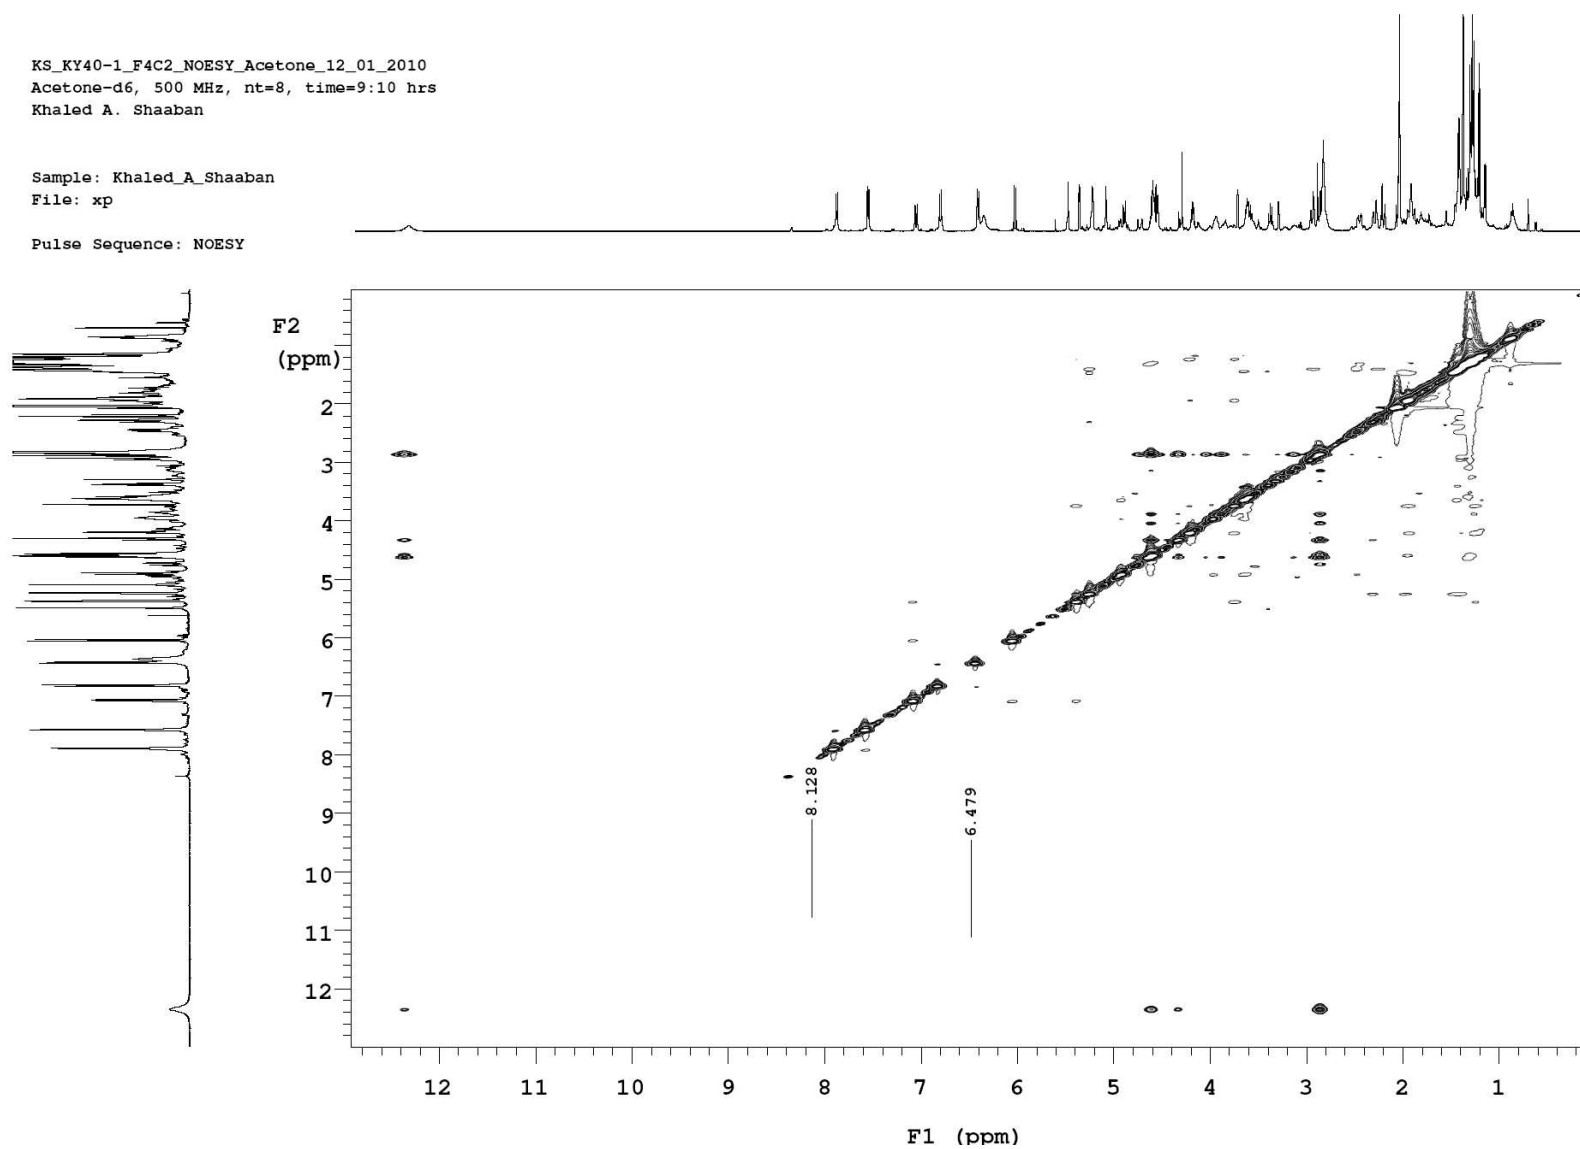

**Figure S31:** NOESY spectrum (acetone-*d*<sub>6</sub>, 500 MHz) of saquayamycin I (**3**)



KS\_KY40-1\_F1C3B\_1HNMR\_CDC13\_12\_17\_2010  
CDC13, 500 MHz, nt=32  
Khaled A. Shaaban

Sample: khaled\_A\_Shaaban  
File: xp

Pulse Sequence: s2pul

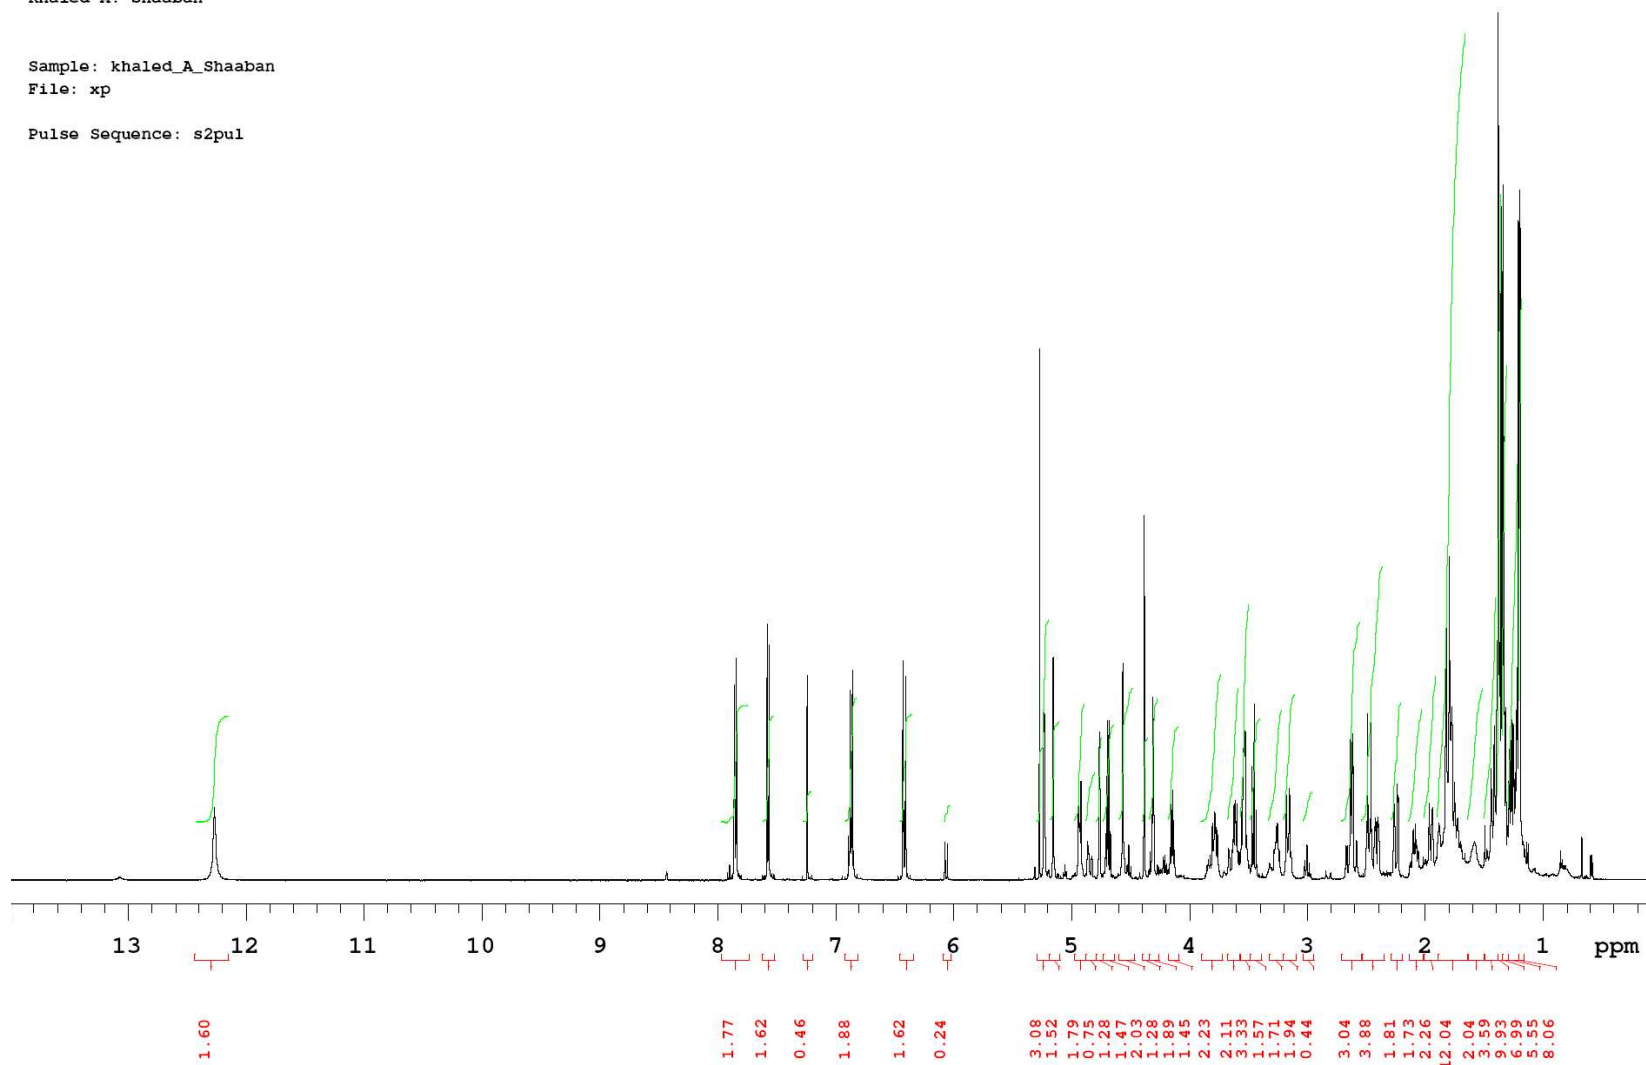

Figure S32: <sup>1</sup>H NMR spectrum (CDCl<sub>3</sub>, 500 MHz) of saquayamycin J (4)

KS\_KY40-1\_F1C3B\_13CNMR\_CDC13\_12\_26\_2010  
 CDC13, 125 MHz, time=10 hrs  
 Khaled A. Shaaban

exp4 Carbon

| SAMPLE      |             | SPECIAL    |          |
|-------------|-------------|------------|----------|
| date        | Dec 26 2010 | temp       | not used |
| solvent     | cdcl3       | gain       | 30       |
| file        | exp         | spin       | 20       |
| ACQUISITION |             | hst        | 0.008    |
| sw          | 30487.8     | pw90       | 11.900   |
| at          | 1.300       | alfa       | 10.000   |
| np          | 79298       | FLAGS      |          |
| fb          | 17000       | il         | n        |
| bs          | 64          | in         | n        |
| dl          | 1.000       | dp         | y        |
| nt          | 100000      | hs         | nn       |
| ct          | 14528       | PROCESSING |          |
| TRANSMITTER |             | lb         | 0.50     |
| tn          | C13         | fn         | not used |
| sfrq        | 125.665     | DISPLAY    |          |
| tof         | 1285.1      | sp         | -802.6   |
| tpwr        | 59          | wp         | 28964.3  |
| pw          | 5.950       | rf1        | 11730.7  |
| DECOUPLER   |             | rfp        | 9704.1   |
| dn          | H1          | rp         | 118.8    |
| dof         | 0           | lp         | 2.8      |
| dm          | yyy         | PLOT       |          |
| dmm         | w           | wc         | 250      |
| dpwr        | 35          | sc         | 0        |
| dmf         | 11448       | vs         | 434141   |
|             |             | th         | 7        |
|             |             | ai         | cdc ph   |

| INDEX | FREQUENCY | PPM     | HEIGHT | INDEX | FREQUENCY | PPM    | HEIGHT |
|-------|-----------|---------|--------|-------|-----------|--------|--------|
| 1     | 26138.4   | 208.023 | 11.1   | 40    | 3219.1    | 25.619 | 16.0   |
| 2     | 25755.1   | 204.973 | 11.8   | 41    | 3153.5    | 25.097 | 12.1   |
| 3     | 23678.9   | 188.449 | 10.0   | 42    | 3098.1    | 24.656 | 10.2   |
| 4     | 22914.5   | 182.366 | 10.7   | 43    | 2256.1    | 17.955 | 22.5   |
| 5     | 19858.6   | 158.045 | 15.3   | 44    | 2216.5    | 17.640 | 25.2   |
| 6     | 18324.3   | 145.835 | 11.5   | 45    | 2187.2    | 17.407 | 20.8   |
| 7     | 17472.5   | 139.056 | 9.7    | 46    | 2054.2    | 16.348 | 24.1   |
| 8     | 17459.1   | 138.948 | 10.8   |       |           |        |        |
| 9     | 17336.2   | 137.971 | 12.6   |       |           |        |        |
| 10    | 16814.3   | 133.817 | 12.3   |       |           |        |        |
| 11    | 16424.9   | 130.718 | 10.7   |       |           |        |        |
| 12    | 15058.6   | 119.844 | 13.3   |       |           |        |        |
| 13    | 14774.8   | 117.586 | 13.6   |       |           |        |        |
| 14    | 14343.1   | 114.150 | 12.8   |       |           |        |        |
| 15    | 12408.8   | 98.756  | 19.4   |       |           |        |        |
| 16    | 11660.7   | 92.802  | 16.0   |       |           |        |        |
| 17    | 11502.5   | 91.543  | 10.9   |       |           |        |        |
| 18    | 10383.7   | 82.639  | 18.9   |       |           |        |        |
| 19    | 10070.2   | 80.144  | 19.9   |       |           |        |        |
| 20    | 9792.0    | 77.930  | 11.2   |       |           |        |        |
| 21    | 9753.8    | 77.626  | 18.1   |       |           |        |        |
| 22    | 9736.2    | 77.485  | 190.4  |       |           |        |        |
| 23    | 9704.1    | 77.230  | 200.9  |       |           |        |        |
| 24    | 9672.0    | 76.975  | 197.4  |       |           |        |        |
| 25    | 9657.5    | 76.860  | 18.4   |       |           |        |        |
| 26    | 9387.2    | 74.709  | 16.2   |       |           |        |        |
| 27    | 9378.9    | 74.642  | 17.6   |       |           |        |        |
| 28    | 9351.0    | 74.420  | 16.7   |       |           |        |        |
| 29    | 9083.0    | 72.287  | 15.0   |       |           |        |        |
| 30    | 8999.3    | 71.621  | 15.8   |       |           |        |        |
| 31    | 8957.9    | 71.291  | 18.0   |       |           |        |        |
| 32    | 8841.1    | 70.362  | 15.9   |       |           |        |        |
| 33    | 8498.2    | 67.633  | 16.5   |       |           |        |        |
| 34    | 6326.6    | 50.351  | 10.9   |       |           |        |        |
| 35    | 5622.3    | 44.745  | 9.0    |       |           |        |        |
| 36    | 5043.6    | 40.140  | 9.2    |       |           |        |        |
| 37    | 4633.8    | 36.878  | 11.4   |       |           |        |        |
| 38    | 3761.5    | 29.936  | 13.6   |       |           |        |        |
| 39    | 3510.8    | 27.940  | 12.8   |       |           |        |        |

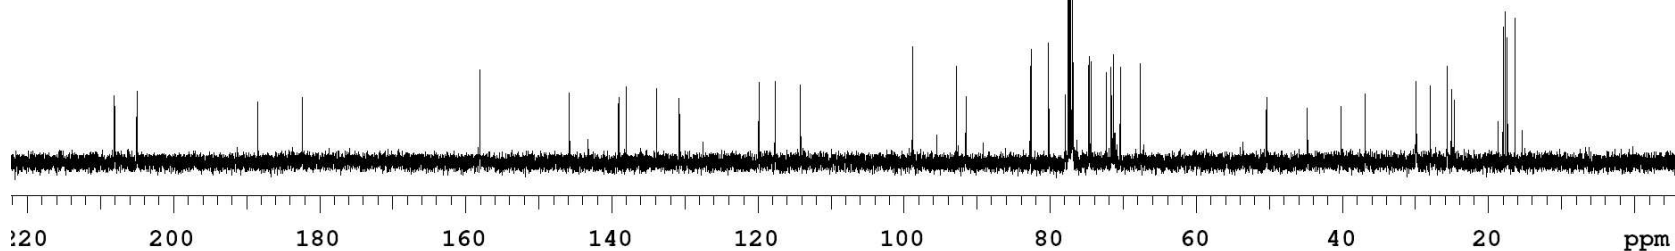

Figure S33: <sup>13</sup>C NMR spectrum (CDCl<sub>3</sub>, 125 MHz) of saquayamycin J (4)

KS\_KY40-1\_F1C3B\_gCOSY\_CDC13\_12\_20\_2010  
CDC13, 500 MHz, nt=4, time = 38 mins  
Khaled A. Shaaban

Sample: Khaled\_A\_Shaaban  
File: xp  
Pulse Sequence: gCOSY

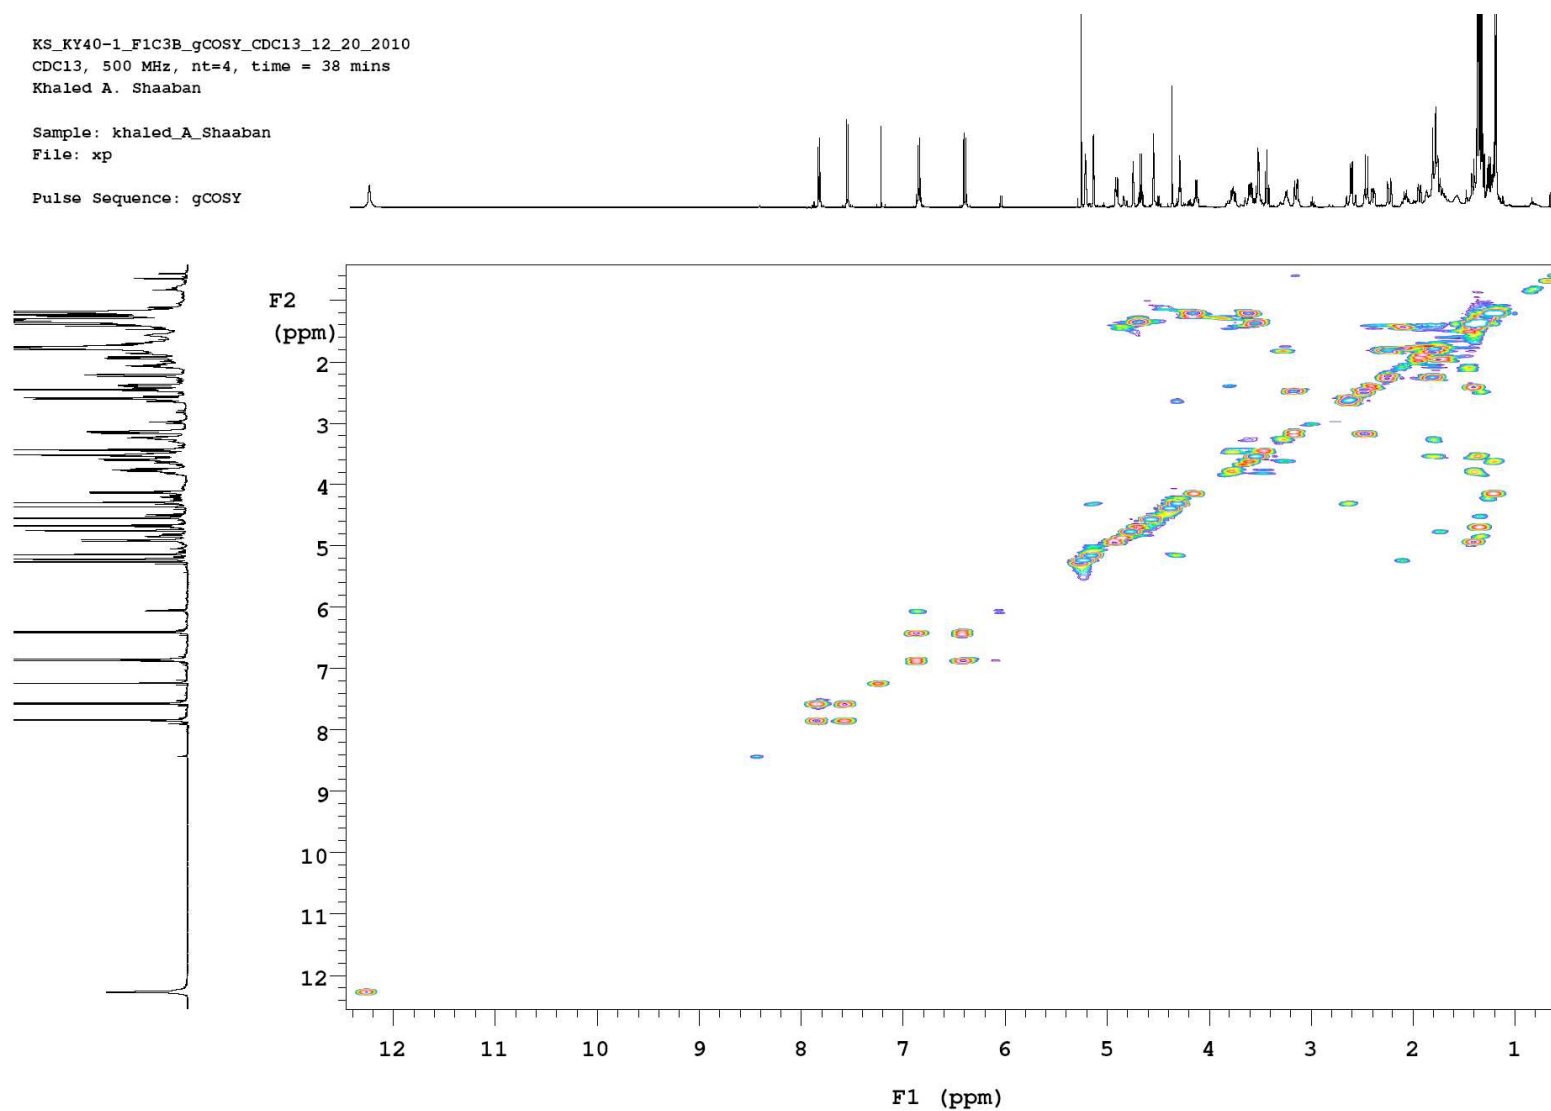

**Figure S34:**  $^1\text{H}$ - $^1\text{H}$  COSY spectrum ( $\text{CDCl}_3$ , 500 MHz) of saquayamycin J (**4**)

KS\_KY40-1\_F1C3B\_GHSQC\_CDC13\_12\_26\_2010  
CDC13, 500 MHz, time=1:17 hrs  
Khaled A. Shaaban

Sample: khaled\_A\_Shaaban  
File: xp

Pulse Sequence: gHSQC

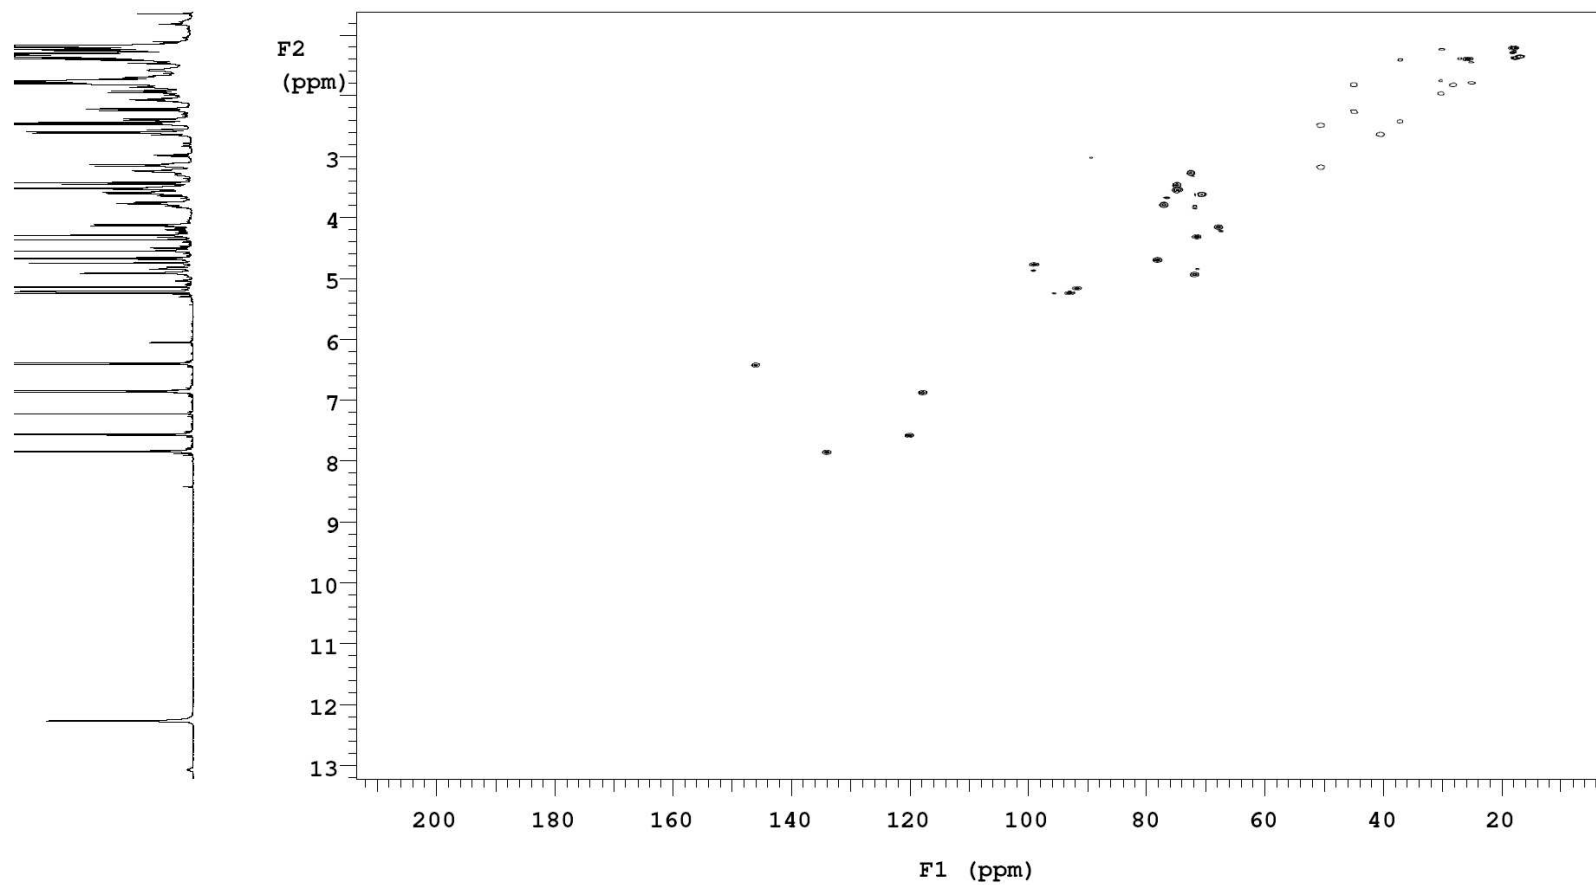

**Figure S35:** HSQC spectrum (CDCl<sub>3</sub>, 500 MHz) of saquayamycin J (**4**)

KS\_KY40-1\_F1C3B\_GHMBC\_CDC13\_12\_27\_2010  
CDC13, 500 MHz, time=10:37 hrs  
Khaled A. Shaaban

Sample: khaled\_A\_Shaaban  
File: xp

Pulse Sequence: gHMBC

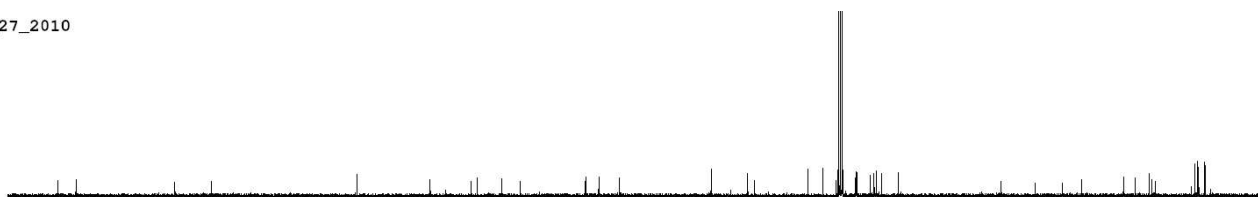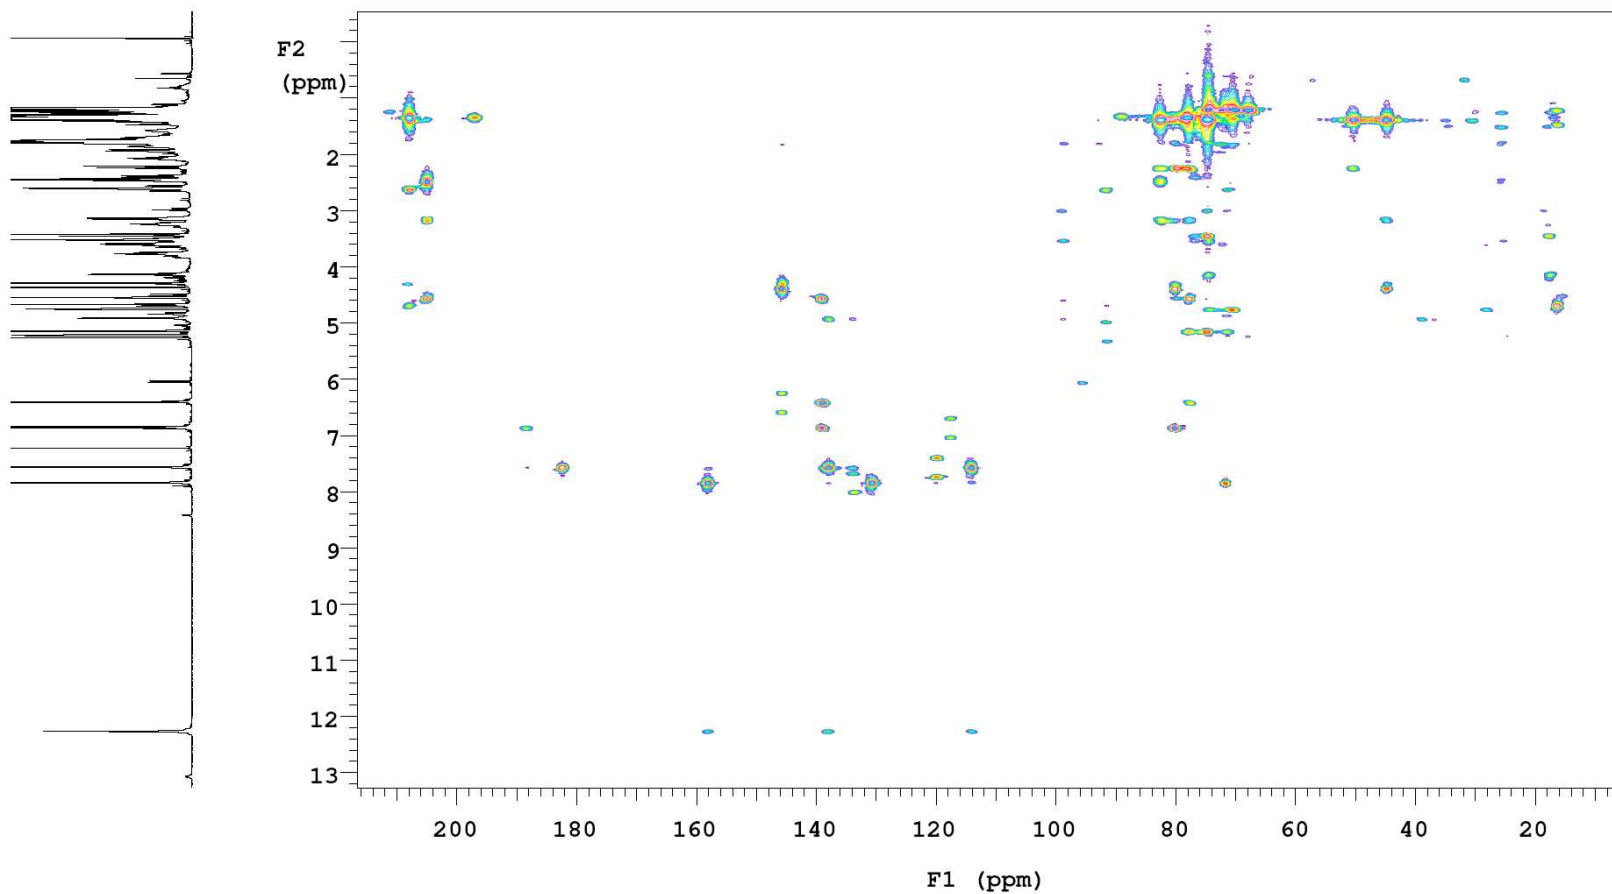

**Figure S36:** HMBC spectrum ( $\text{CDCl}_3$ , 500 MHz) of saquayamycin J (**4**)

KS\_KY40-1\_F1C3B\_NOESY\_CDC13\_12\_27\_2010  
CDC13, 500 MHz, time=2:10 hrs  
Khaled A. Shaaban

Sample: khaled\_A\_Shaaban  
File: xp

Pulse Sequence: NOESY

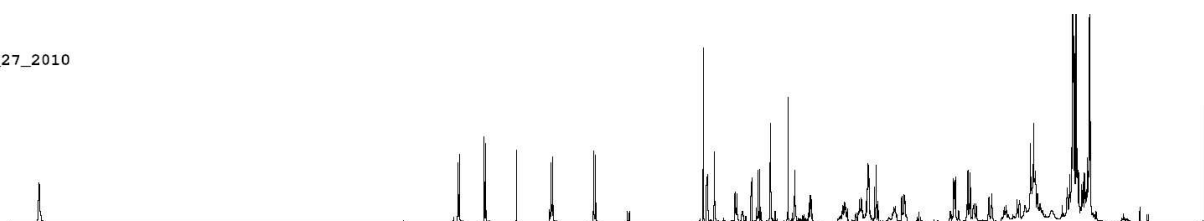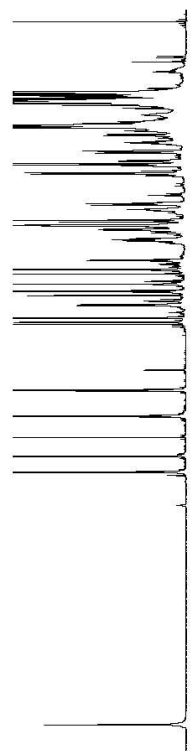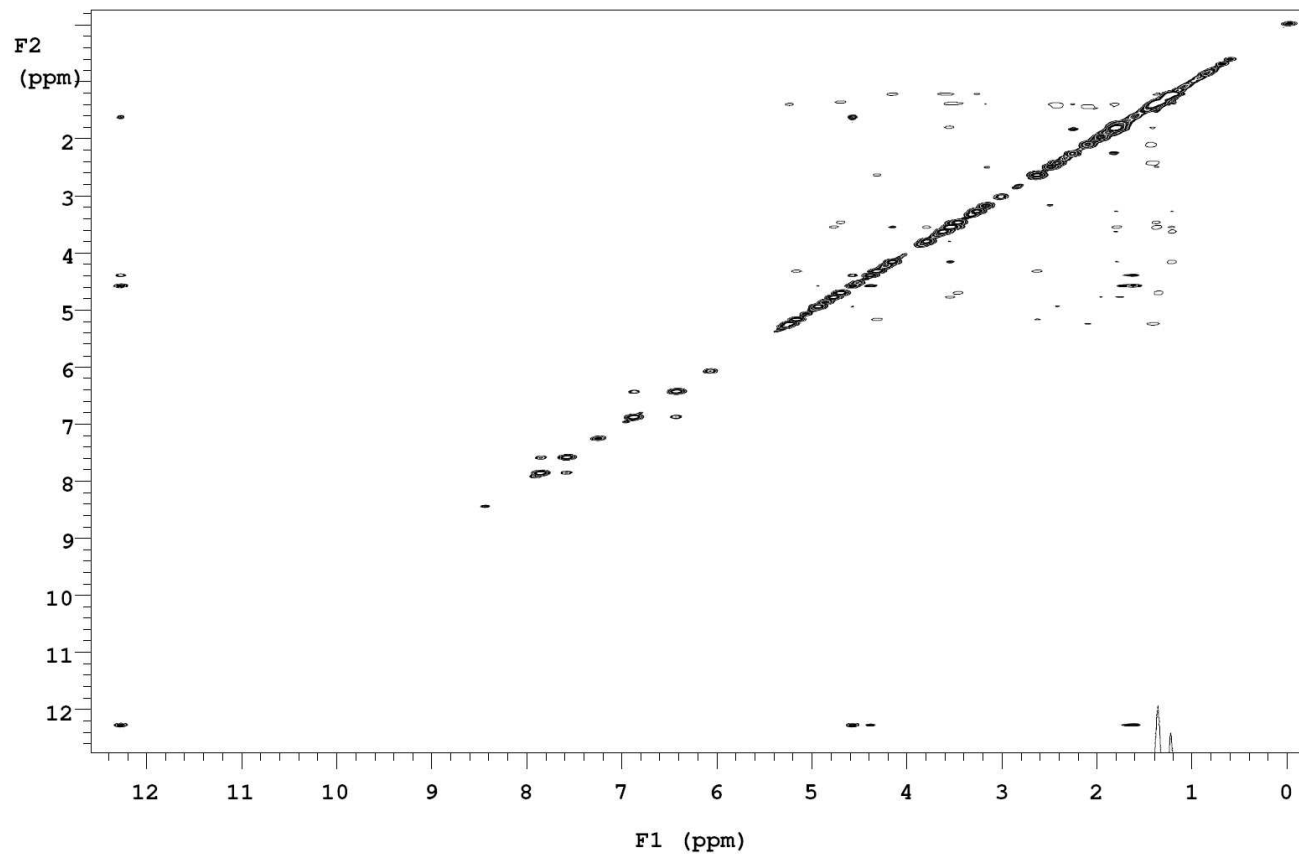

**Figure S37:** NOESY spectrum ( $\text{CDCl}_3$ , 500 MHz) of saquayamycin J (**4**)

■ -TOF MS: 1.257 to 1.365 min from KSKY40-1-F1C3A.wiff Agilent

Max. 8.3e4 coun

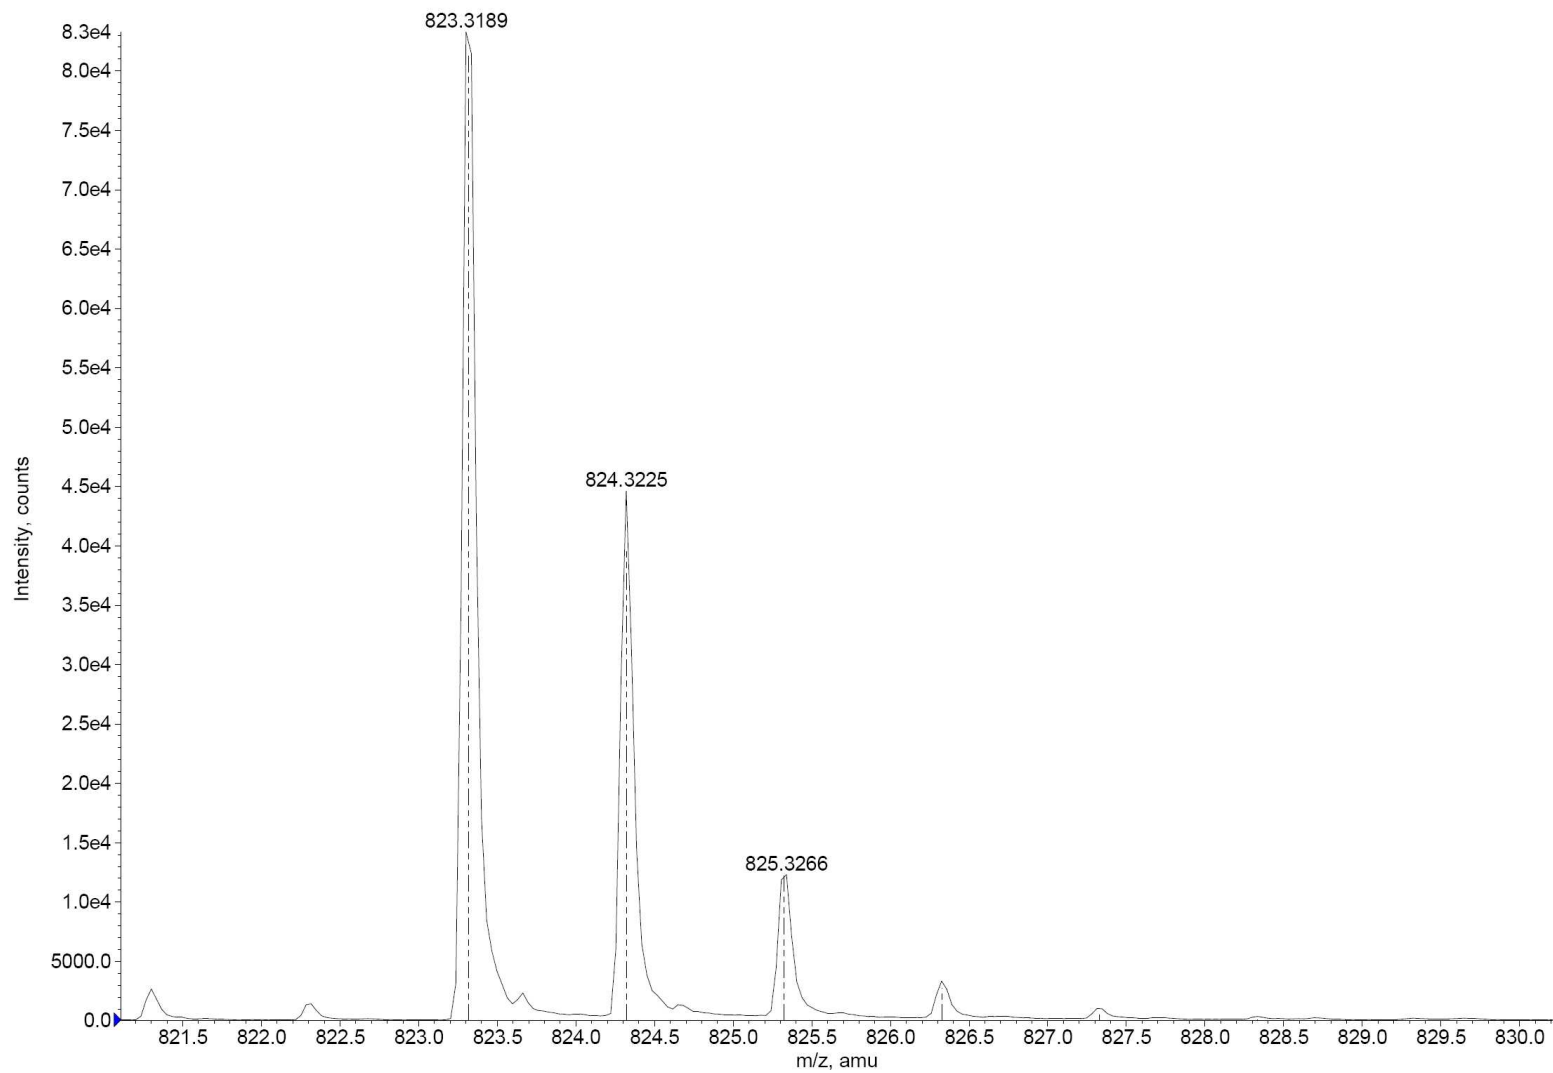

**Figure S38:** (-)-HRESI-MS spectrum of saquayamycin K (5)

■ -TOF MS: 1.257 to 1.365 min from KSKY40-1-F1C3A.wiff Agilent

Max. 8.3e4 counts

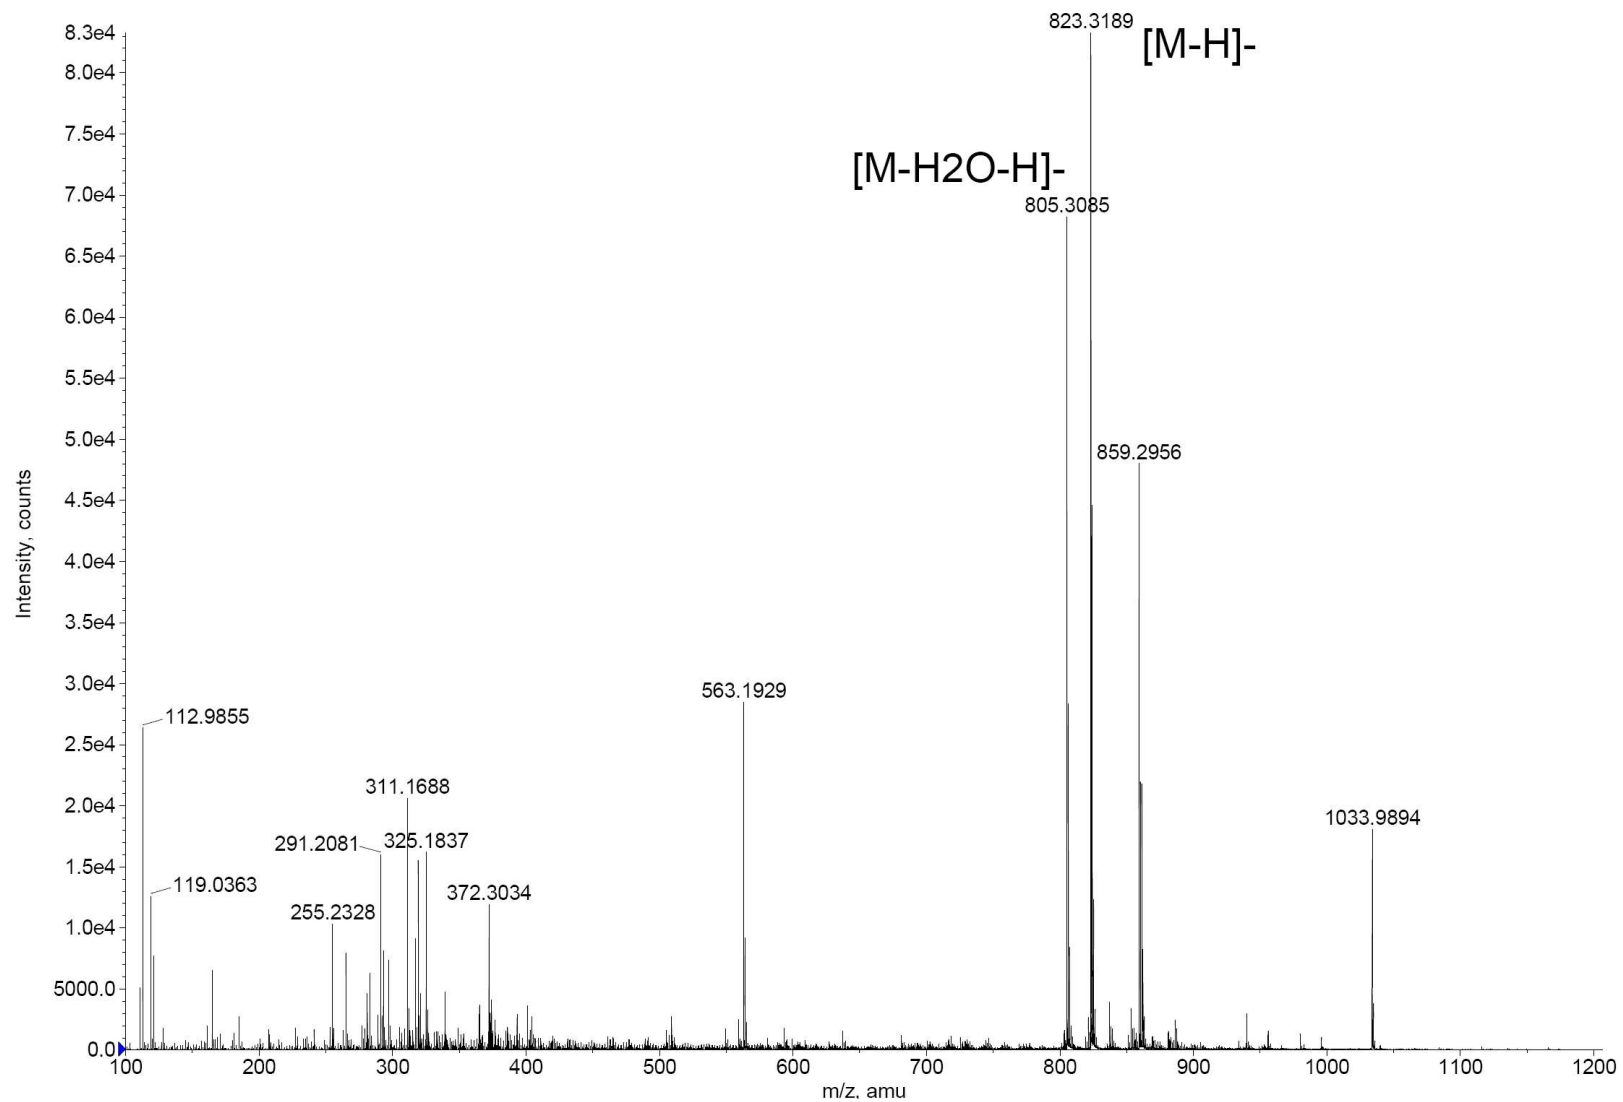

**Figure S39:** (-)-HRESI-MS spectrum of saquayamycin K (5)



KS\_KY40-1\_F1C3A\_1HNMR\_CDC13\_12\_17\_2010  
CDC13, 500 MHz, nt=32  
Khaled A. Shaaban

Sample: Khaled\_A\_Shaaban  
File: xp

Pulse Sequence: s2pul

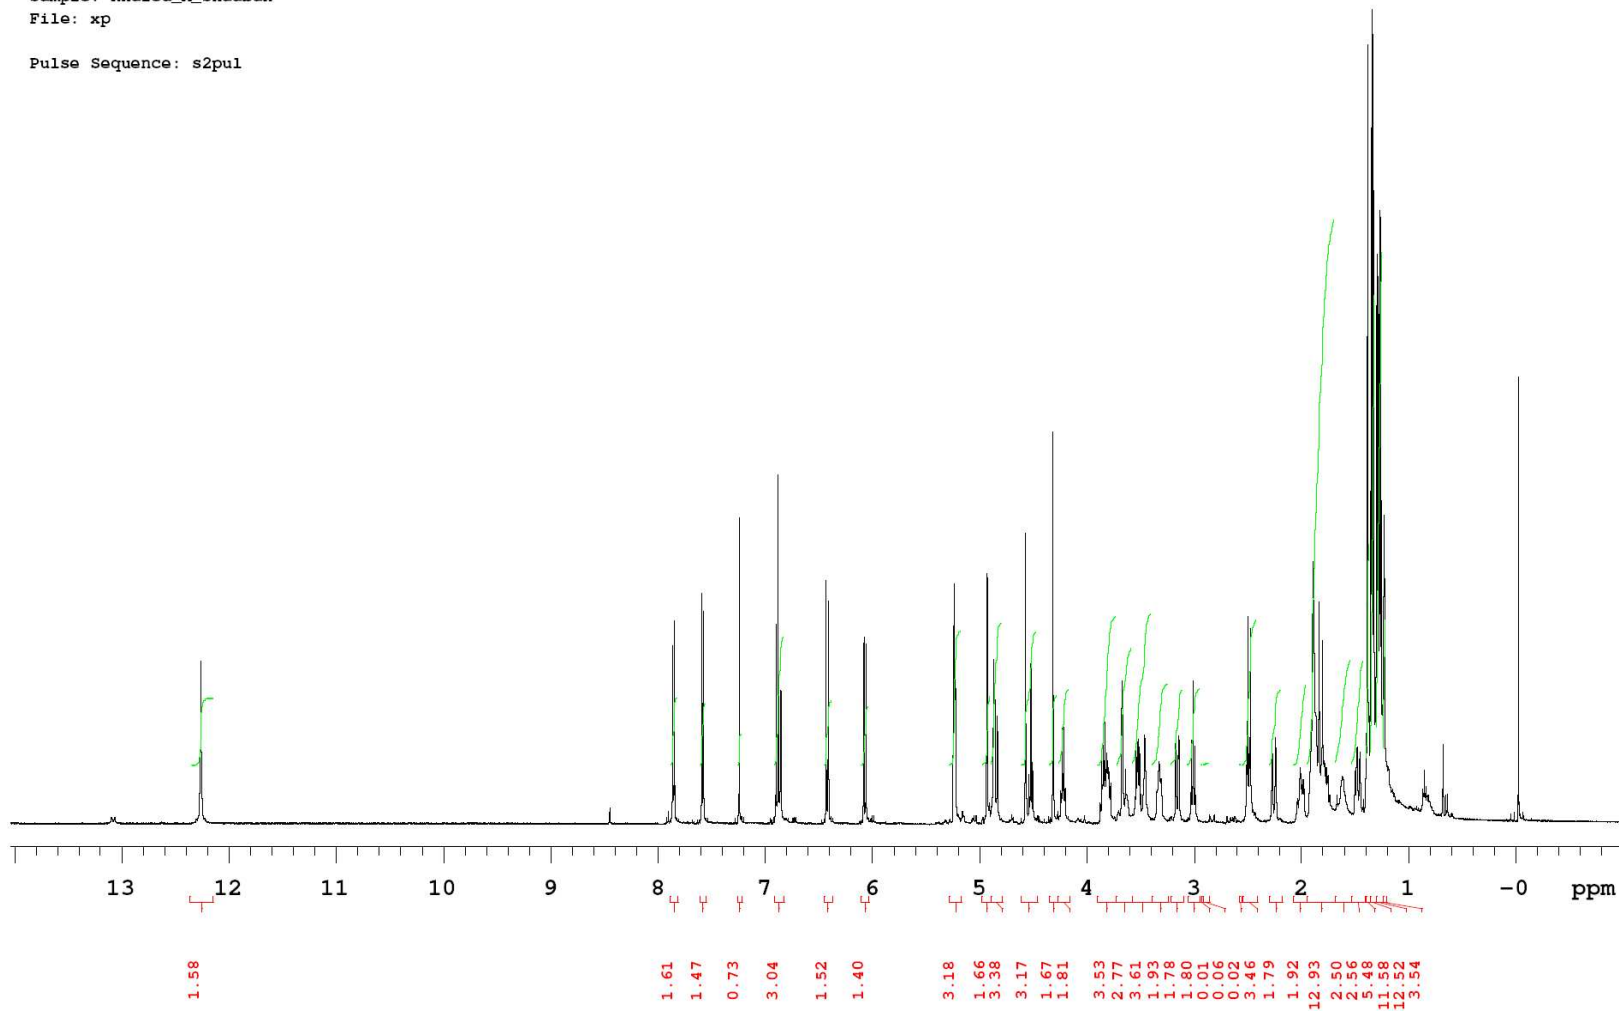

**Figure S40:** <sup>1</sup>H NMR spectrum (CDCl<sub>3</sub>, 500 MHz) of saquayamycin K (**5**)

KS\_KY40-1\_F1C3A\_13CNMR\_CDC13\_12\_21\_2010  
 CDC13, 125 MHz, time=16 hrs  
 Khaled A. Shaaban

exp2 Carbon

| SAMPLE      |             | SPECIAL    |          |
|-------------|-------------|------------|----------|
| date        | Dec 20 2010 | temp       | not used |
| solvent     | cdc13       | gain       | 30       |
| file        | exp         | spin       | 20       |
| ACQUISITION |             | hst        | 0.008    |
| sw          | 30487.8     | pw90       | 11.900   |
| at          | 1.300       | alfa       | 10.000   |
| np          | 79298       | FLAGS      |          |
| fb          | 17000       | il         | n        |
| bs          | 64          | in         | n        |
| d1          | 1.000       | dp         | y        |
| nt          | 64000       | hs         | nn       |
| ct          | 25600       | PROCESSING |          |
| TRANSMITTER | lb          | 0.50       |          |
| tn          | C13         | fn         | not used |
| sfrq        | 125.665     | DISPLAY    |          |
| tof         | 1285.1      | sp         | -995.2   |
| tpwr        | 59          | wp         | 29457.4  |
| pw          | 5.950       | rfl        | 11728.8  |
| DECOUPLER   | rfp         | 9704.1     |          |
| dn          | H1          | rp         | 133.5    |
| dof         | 0           | lp         | -40.7    |
| dm          | YYY         | PLOT       |          |
| dmm         | w           | wc         | 250      |
| dpwr        | 35          | sc         | 0        |
| dmf         | 11448       | vs         | 772995   |
|             |             | th         | 6        |
|             |             | ai         | cdc ph   |

| INDEX | FREQUENCY | PPM     | HEIGHT | INDEX | FREQUENCY | PPM    | HEIGHT |
|-------|-----------|---------|--------|-------|-----------|--------|--------|
| 1     | 25774.2   | 205.124 | 14.4   | 40    | 3220.0    | 25.626 | 17.1   |
| 2     | 24760.9   | 197.061 | 16.2   | 41    | 3130.7    | 24.916 | 14.4   |
| 3     | 23667.7   | 188.360 | 10.7   | 42    | 3108.8    | 24.742 | 11.9   |
| 4     | 22926.6   | 182.462 | 11.8   | 43    | 2343.5    | 18.651 | 28.1   |
| 5     | 19889.3   | 158.290 | 15.9   | 44    | 2263.5    | 18.014 | 26.1   |
| 6     | 18304.8   | 145.679 | 14.6   | 45    | 2181.7    | 17.363 | 26.9   |
| 7     | 18004.3   | 143.288 | 18.3   | 46    | 1931.8    | 15.375 | 29.5   |
| 8     | 17464.2   | 138.989 | 18.4   |       |           |        |        |
| 9     | 17442.8   | 138.819 | 14.2   |       |           |        |        |
| 10    | 16811.0   | 133.791 | 14.8   |       |           |        |        |
| 11    | 16407.7   | 130.581 | 12.2   |       |           |        |        |
| 12    | 16021.1   | 127.504 | 19.4   |       |           |        |        |
| 13    | 15065.1   | 119.896 | 14.7   |       |           |        |        |
| 14    | 14792.0   | 117.723 | 15.3   |       |           |        |        |
| 15    | 14336.6   | 114.098 | 12.0   |       |           |        |        |
| 16    | 12431.1   | 98.933  | 18.9   |       |           |        |        |
| 17    | 11998.9   | 95.494  | 23.5   |       |           |        |        |
| 18    | 11637.0   | 92.613  | 19.7   |       |           |        |        |
| 19    | 11209.0   | 89.207  | 20.7   |       |           |        |        |
| 20    | 10398.1   | 82.754  | 23.4   |       |           |        |        |
| 21    | 10073.0   | 80.166  | 23.2   |       |           |        |        |
| 22    | 9753.8    | 77.626  | 20.0   |       |           |        |        |
| 23    | 9735.7    | 77.482  | 242.0  |       |           |        |        |
| 24    | 9704.1    | 77.230  | 252.4  |       |           |        |        |
| 25    | 9672.0    | 76.975  | 250.3  |       |           |        |        |
| 26    | 9595.7    | 76.367  | 21.2   |       |           |        |        |
| 27    | 9376.5    | 74.624  | 16.5   |       |           |        |        |
| 28    | 9012.3    | 71.725  | 20.3   |       |           |        |        |
| 29    | 8990.9    | 71.554  | 18.5   |       |           |        |        |
| 30    | 8979.7    | 71.465  | 21.4   |       |           |        |        |
| 31    | 8943.4    | 71.177  | 20.3   |       |           |        |        |
| 32    | 8897.4    | 70.810  | 21.9   |       |           |        |        |
| 33    | 8435.0    | 67.130  | 19.8   |       |           |        |        |
| 34    | 6329.9    | 50.377  | 10.6   |       |           |        |        |
| 35    | 5620.9    | 44.734  | 11.1   |       |           |        |        |
| 36    | 4884.5    | 38.874  | 15.1   |       |           |        |        |
| 37    | 3780.1    | 30.084  | 15.2   |       |           |        |        |
| 38    | 3757.3    | 29.903  | 8.2    |       |           |        |        |
| 39    | 3431.7    | 27.311  | 13.0   |       |           |        |        |

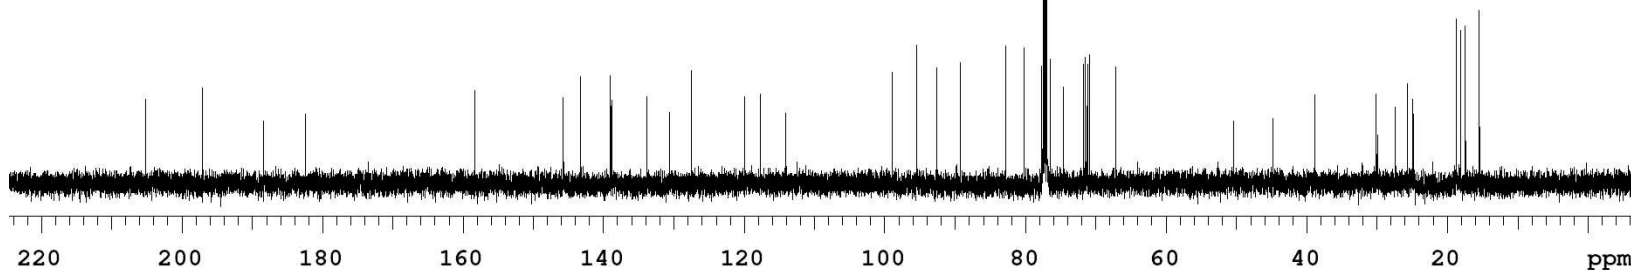

Figure S41: <sup>13</sup>C NMR spectrum (CDCl<sub>3</sub>, 125 MHz) of saquayamycin K (5)

KS\_KY40-1\_F1C3A\_gCOSY\_CDC13\_12\_20\_2010  
CDC13, 500 MHz, nt=4, time = 1:18 hrs  
Khaled A. Shaaban

Sample: Khaled\_A\_Shaaban  
File: xp

Pulse Sequence: gCOSY

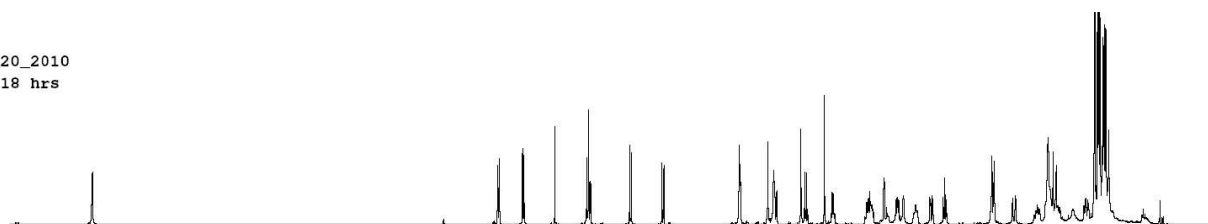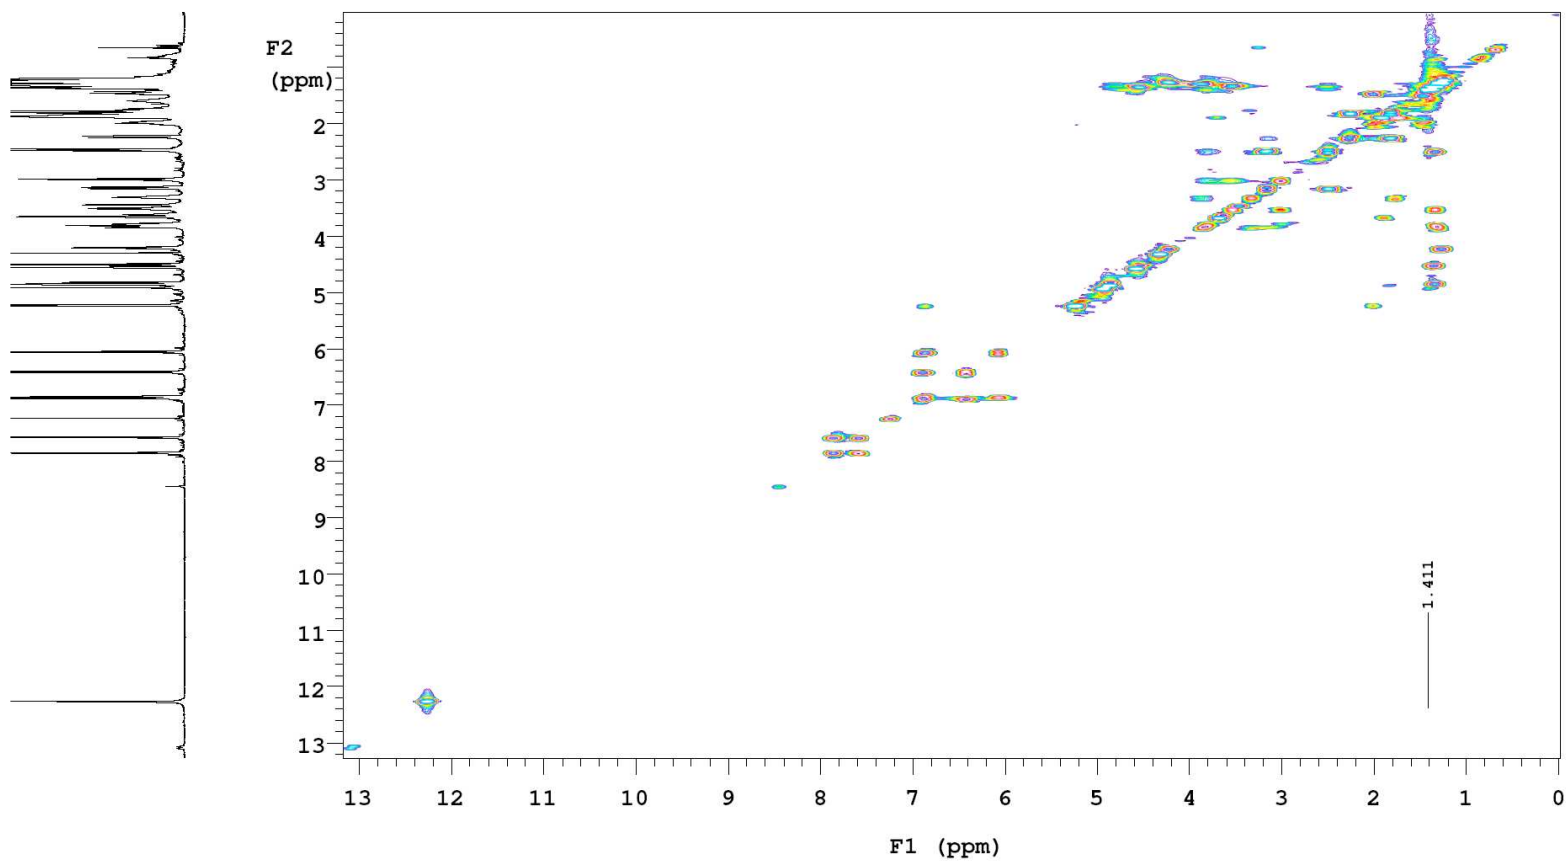

**Figure S42:**  $^1\text{H}$ - $^1\text{H}$  COSY spectrum ( $\text{CDCl}_3$ , 500 MHz) of saquayamycin K (**5**)

KS\_KY40-1\_F1C3A\_GHSQC\_CDC13\_12\_21\_2010  
CDC13, 500 MHz, nt=4, time = 1:16 hrs  
Khaled A. Shaaban

Sample: Khaled\_A\_Shaaban  
File: xp

Pulse Sequence: gHSQC

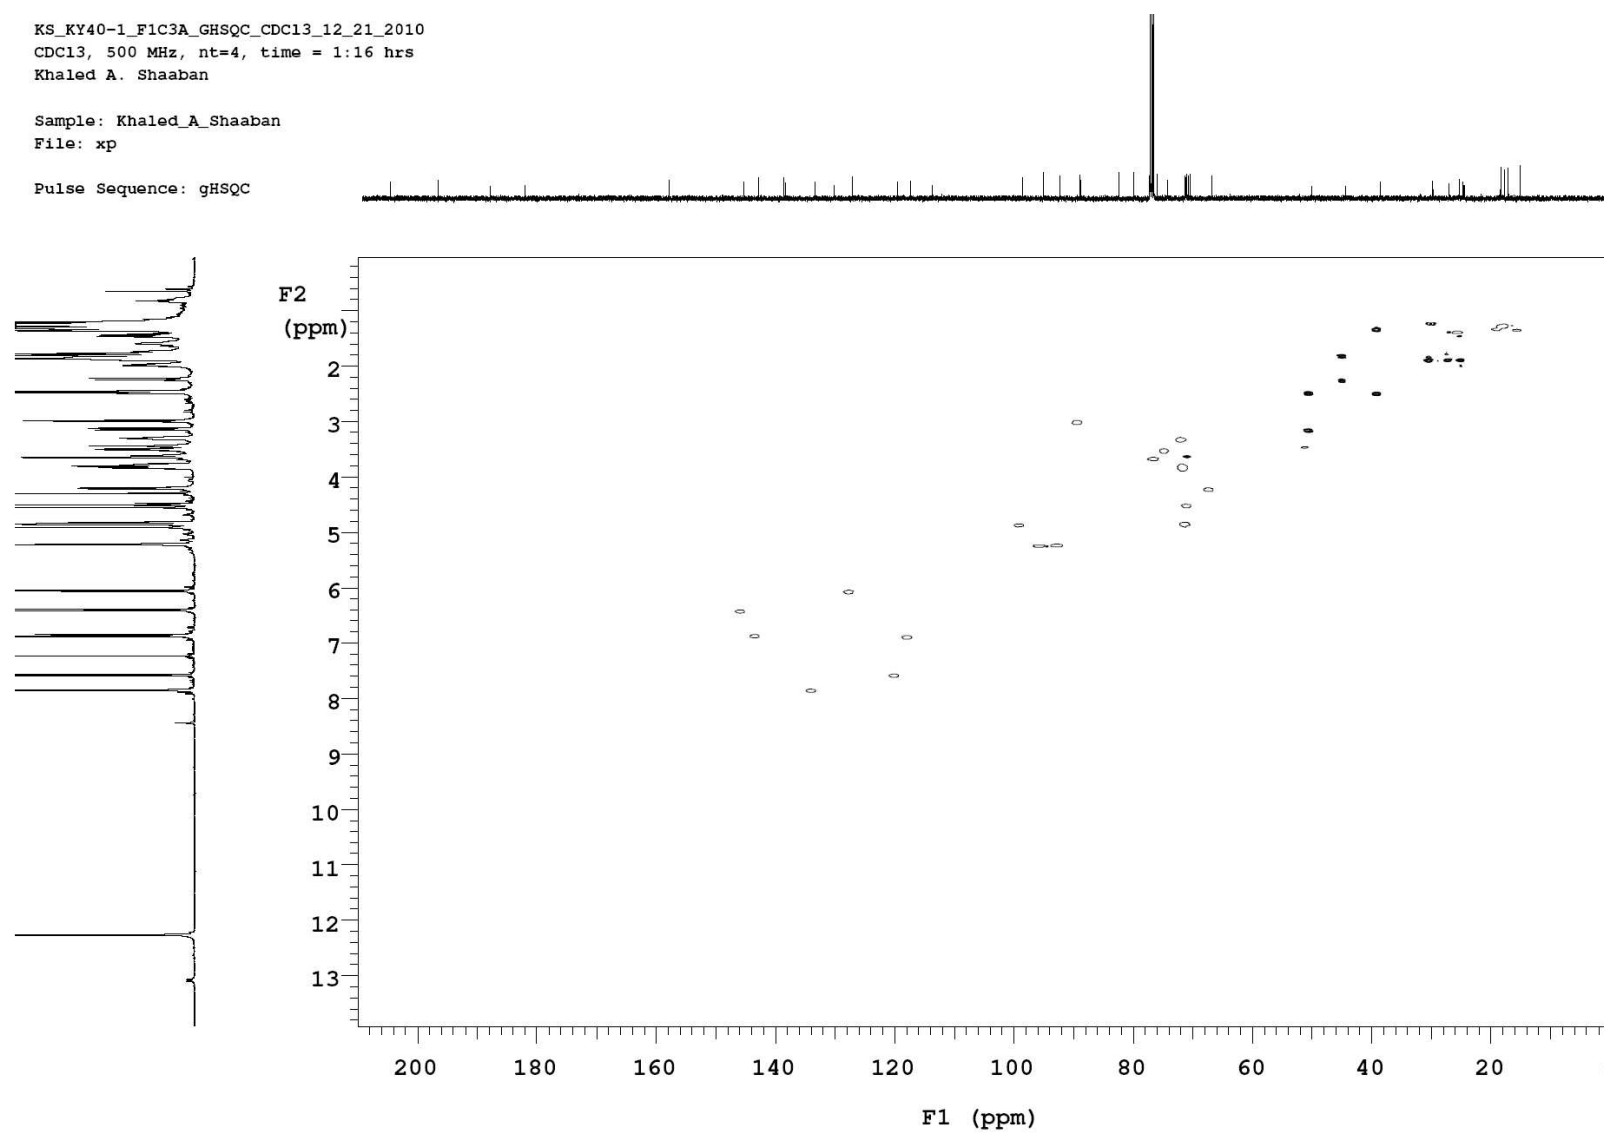

**Figure S43:** HSQC spectrum (CDCl<sub>3</sub>, 500 MHz) of saquayamycin K (**5**)

CDCl<sub>3</sub>, 500 MHz, nt=32, time = 10:36 hrs  
Khaled A. Shaaban

Sample: Khaled\_A\_Shaaban  
File: xp

Pulse Sequence: gHMBC

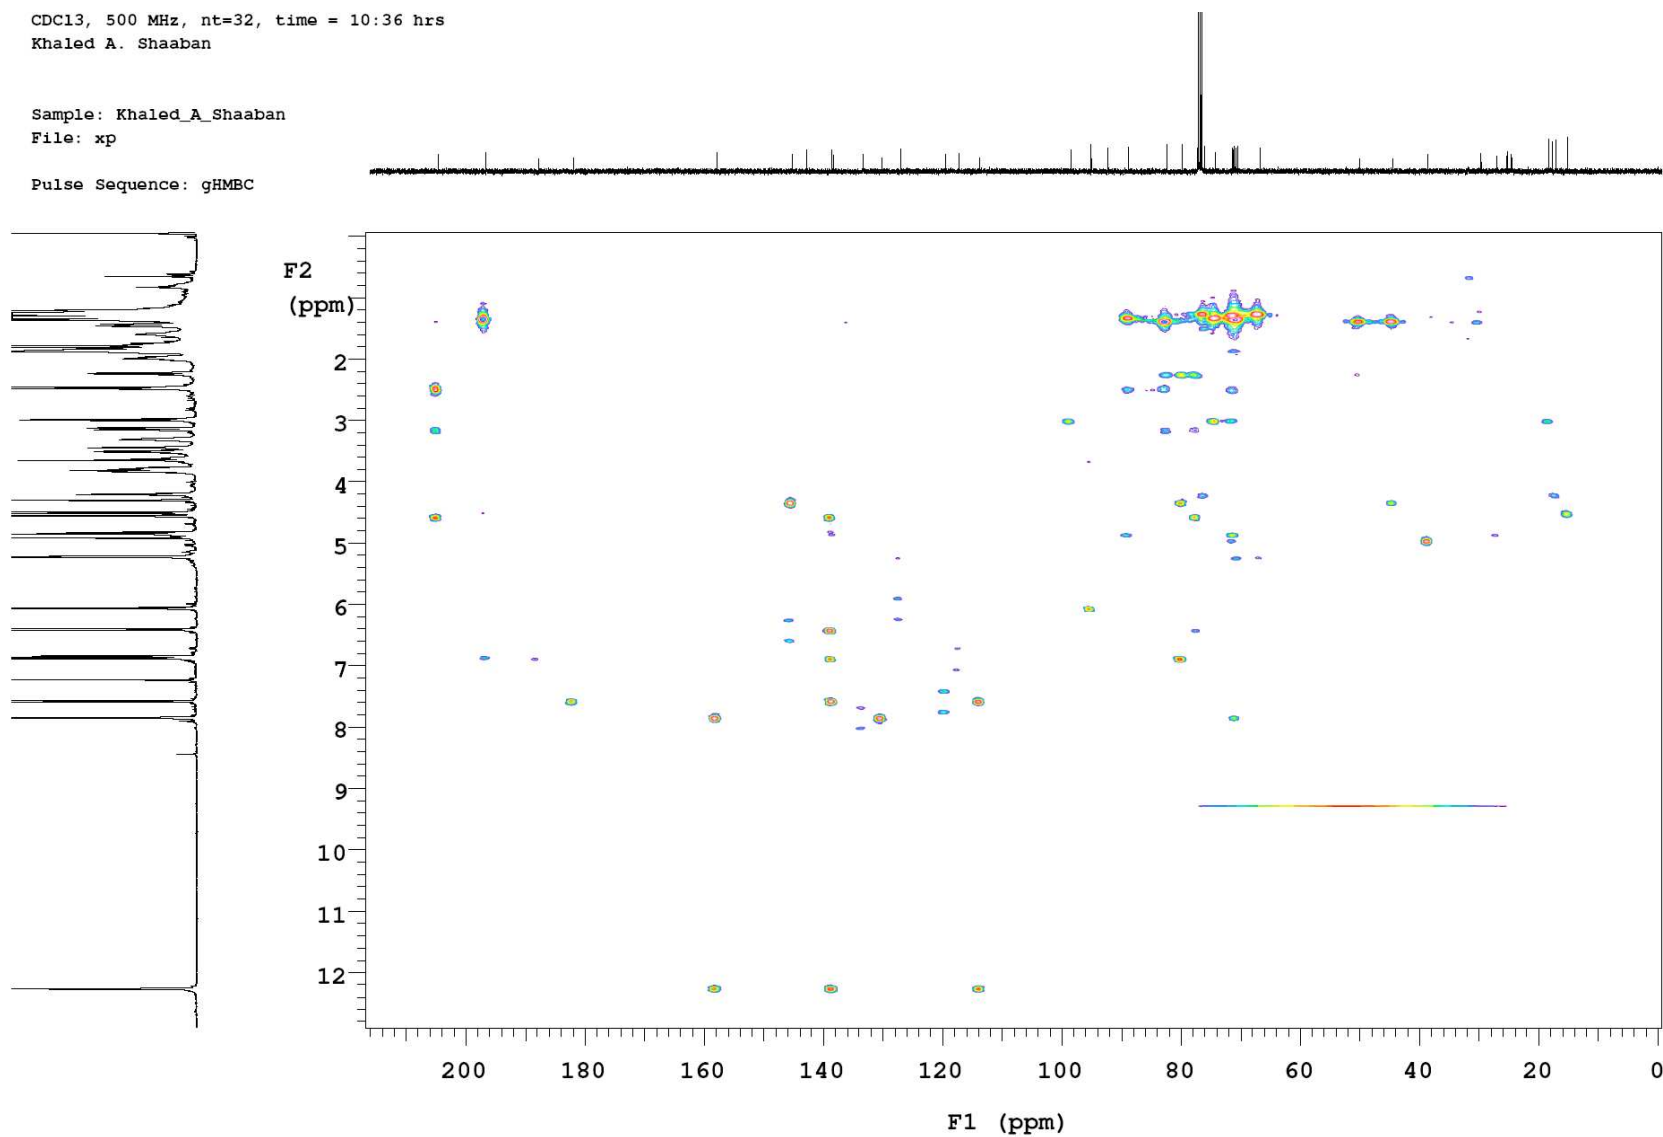

**Figure S44:** HMBC spectrum (CDCl<sub>3</sub>, 500 MHz) of saquayamycin K (5)

KS\_KY40-1\_F1C3A\_NOESY\_CDC13\_12\_22\_2010  
CDC13, 500 MHz, nt=4, time = 1:45 hrs  
Khaled A. Shaaban

Sample: Khaled\_A\_Shaaban  
File: xp

Pulse Sequence: NOESY

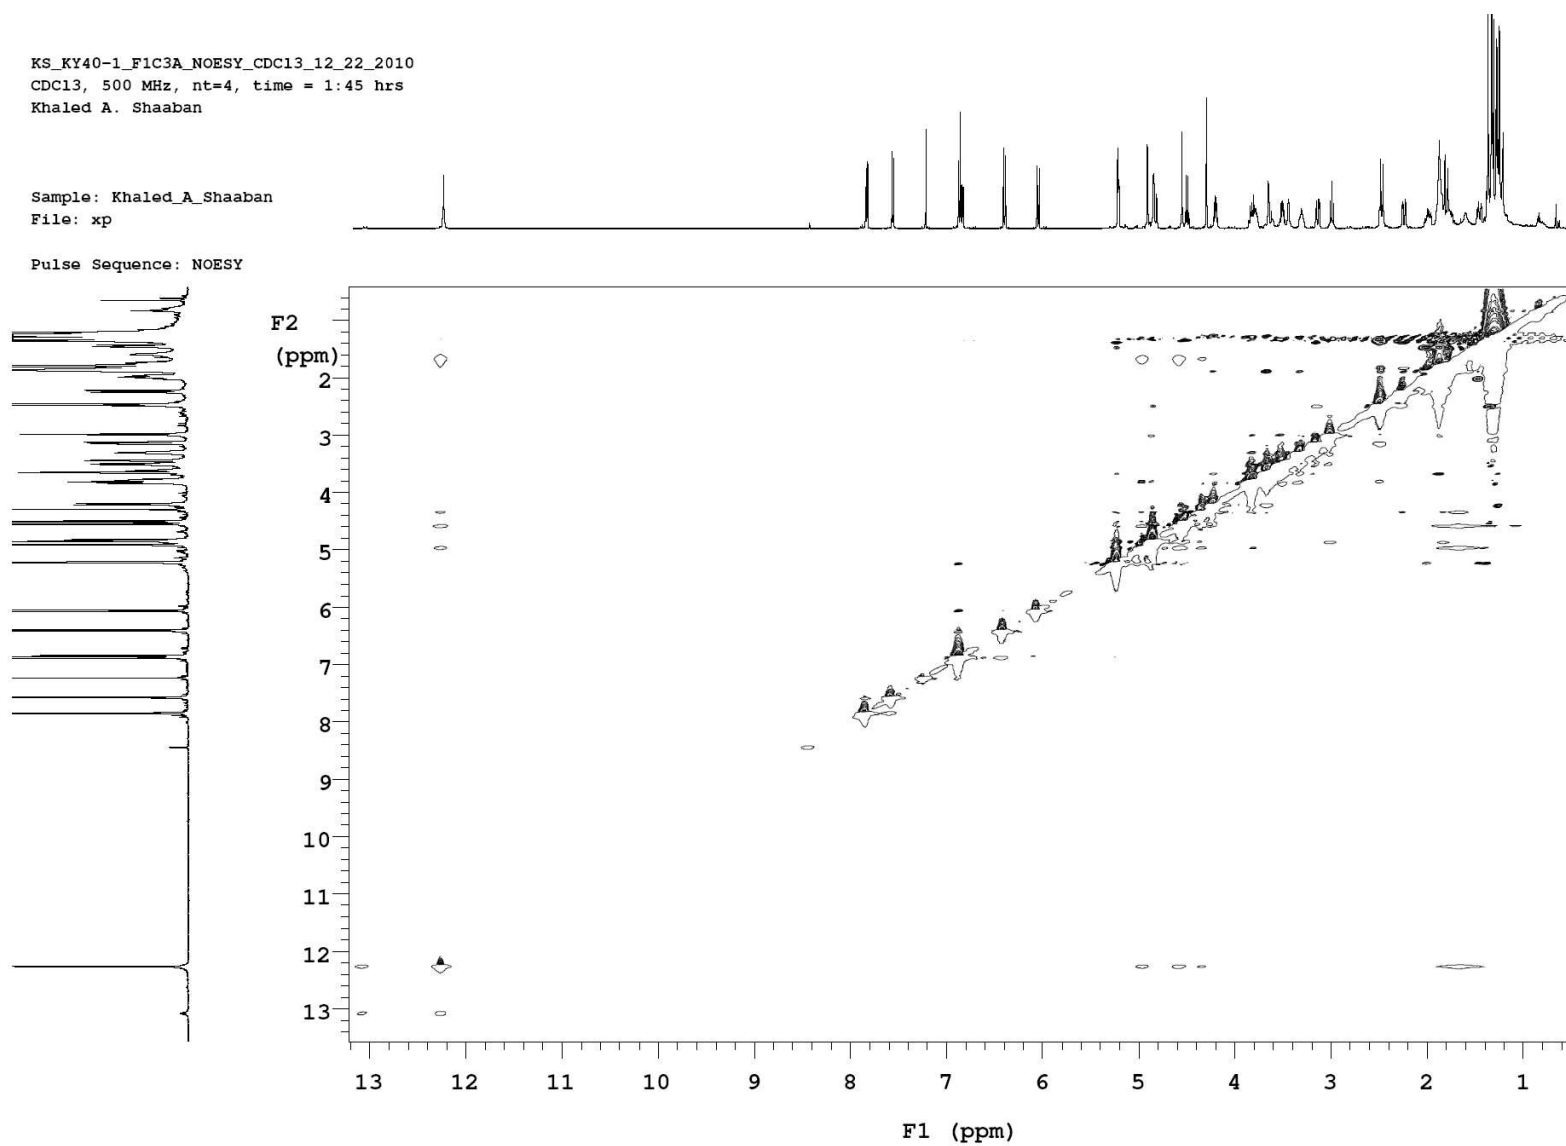

**Figure S45:** NOESY spectrum (CDCl<sub>3</sub>, 500 MHz) of saquayamycin K (**5**)

■ -TOF MS: 1.020 to 1.128 min from KSKY40-1-F1C2B.wiff Agilent

Max. 3.3e5 coun

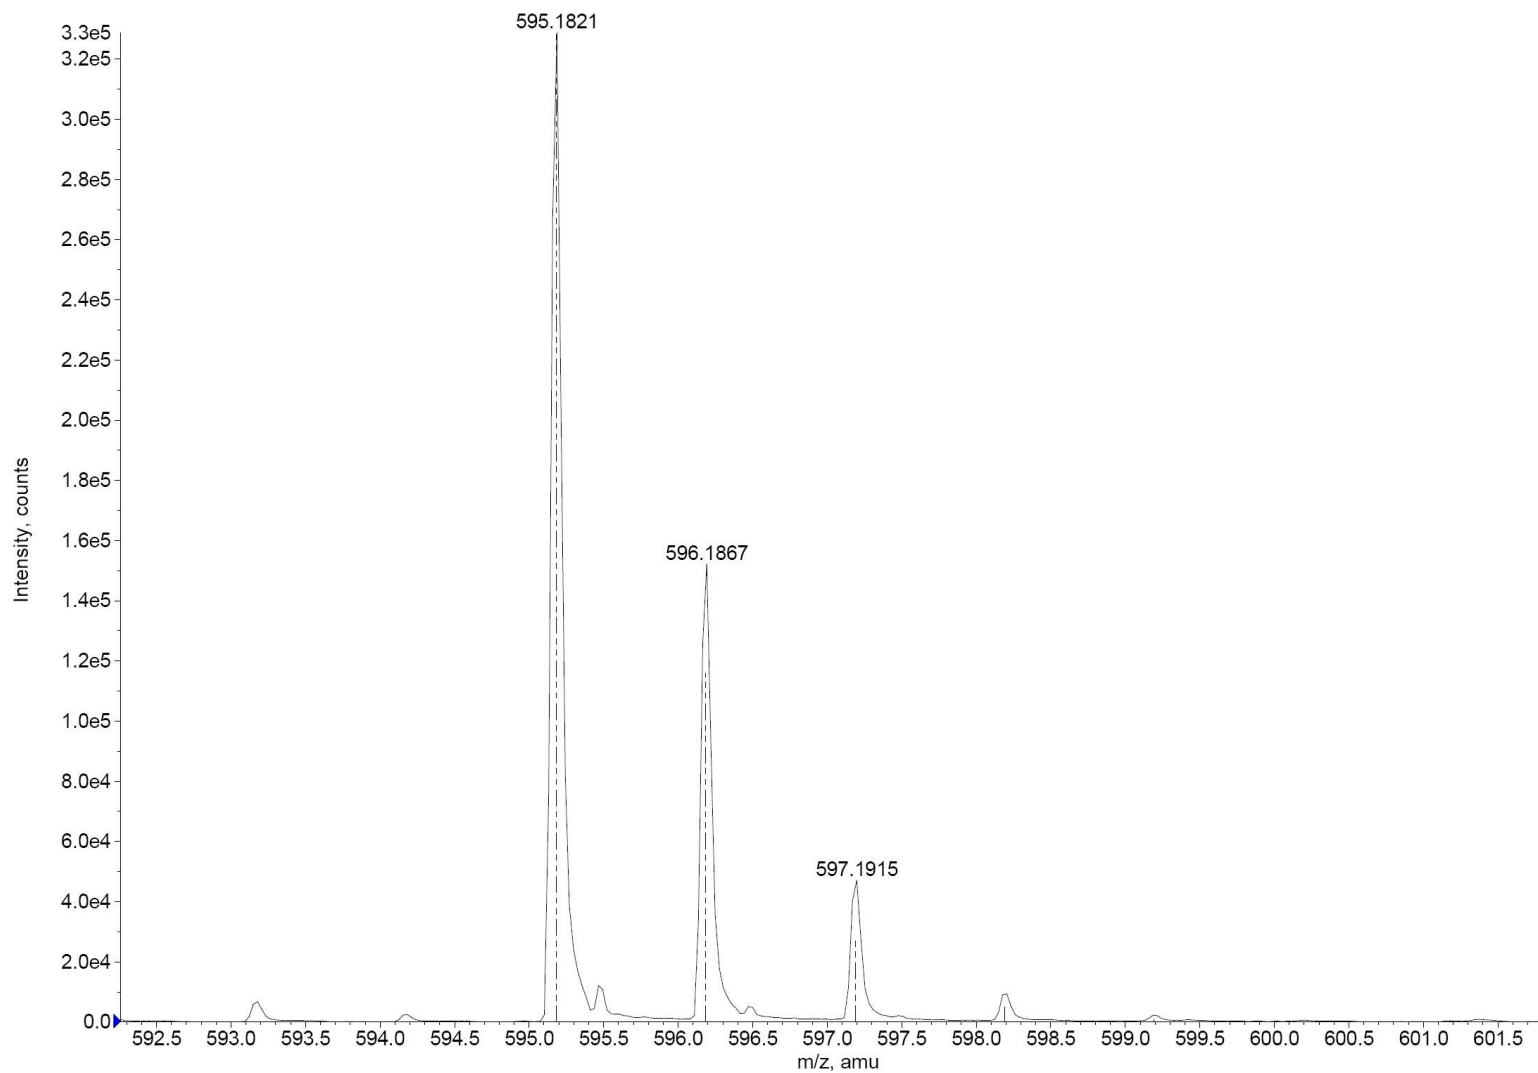

**Figure S46:** (-)-HRESI-MS spectrum of saquayamycin B1 (**6**)

■ -TOF MS: 1.020 to 1.128 min from KSKY40-1-F1C2B.wiff Agilent

Max. 3.3e5 counts

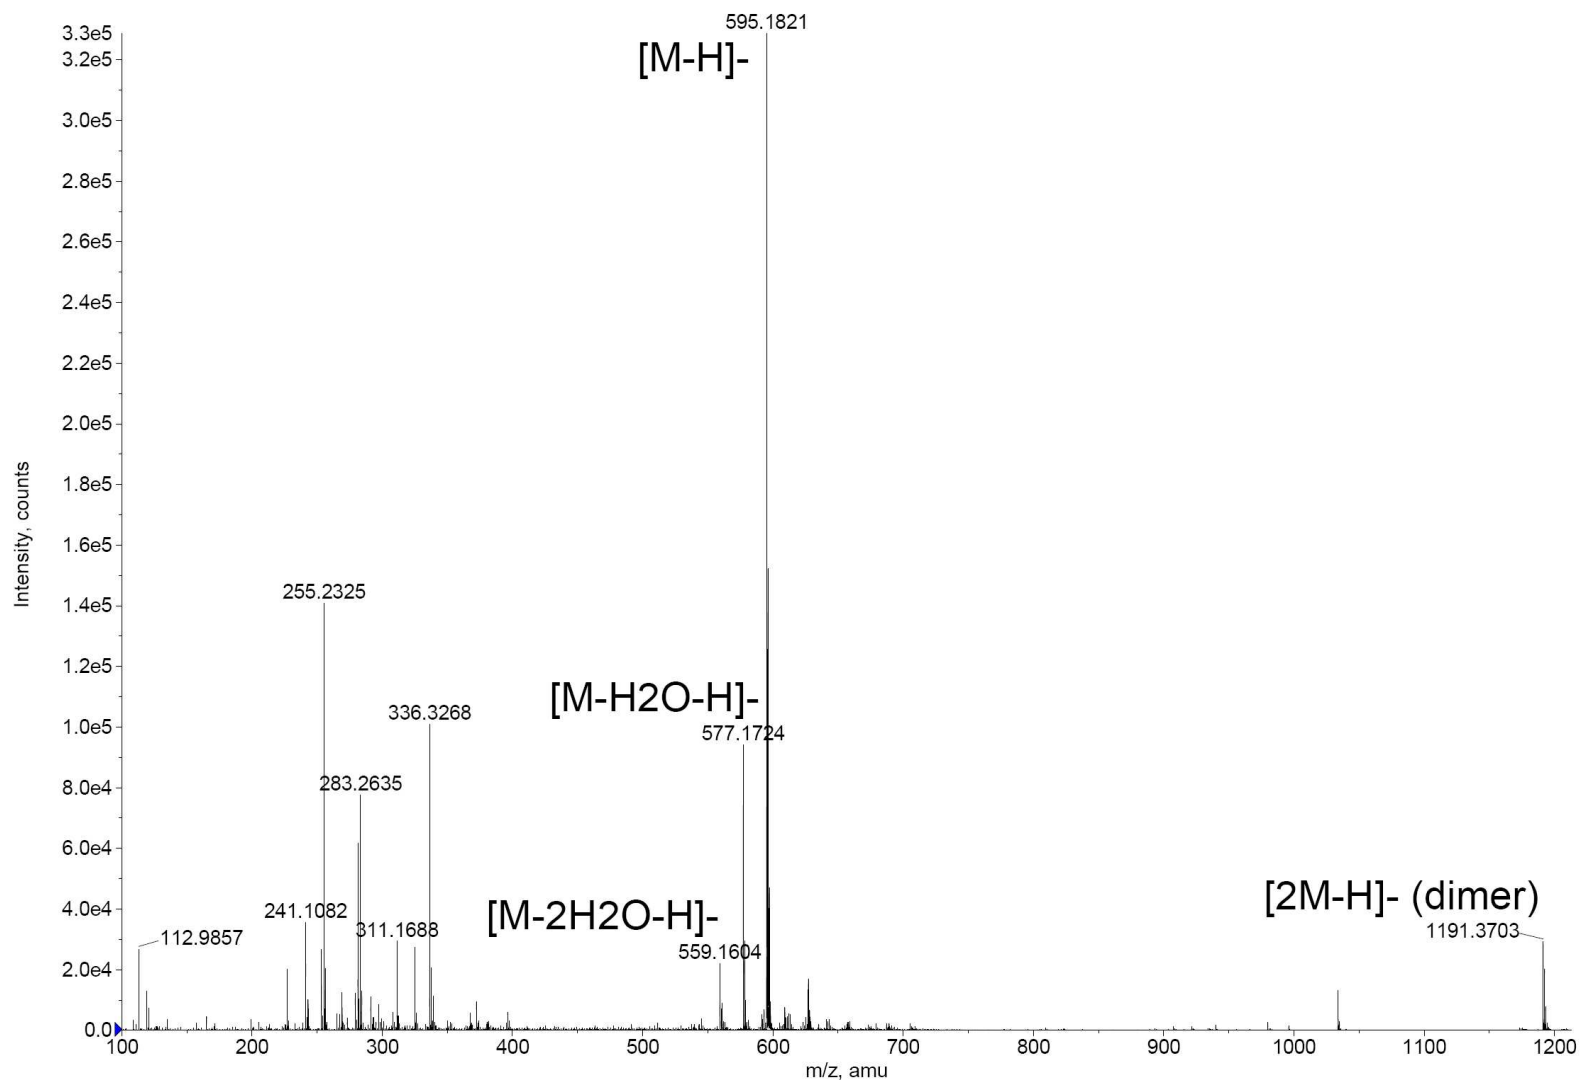

**Figure S47:** (-)-HRESI-MS spectrum of saquayamycin B1 (**6**)



KS\_KY40-1\_F1C2B\_1HNMR\_CDC13\_12\_17\_2010  
CDC13, 500 MHz, nt=32  
Khaled A. Shaaban

Sample: Khaled\_A\_Shaaban  
File: xp

Pulse Sequence: s2pul

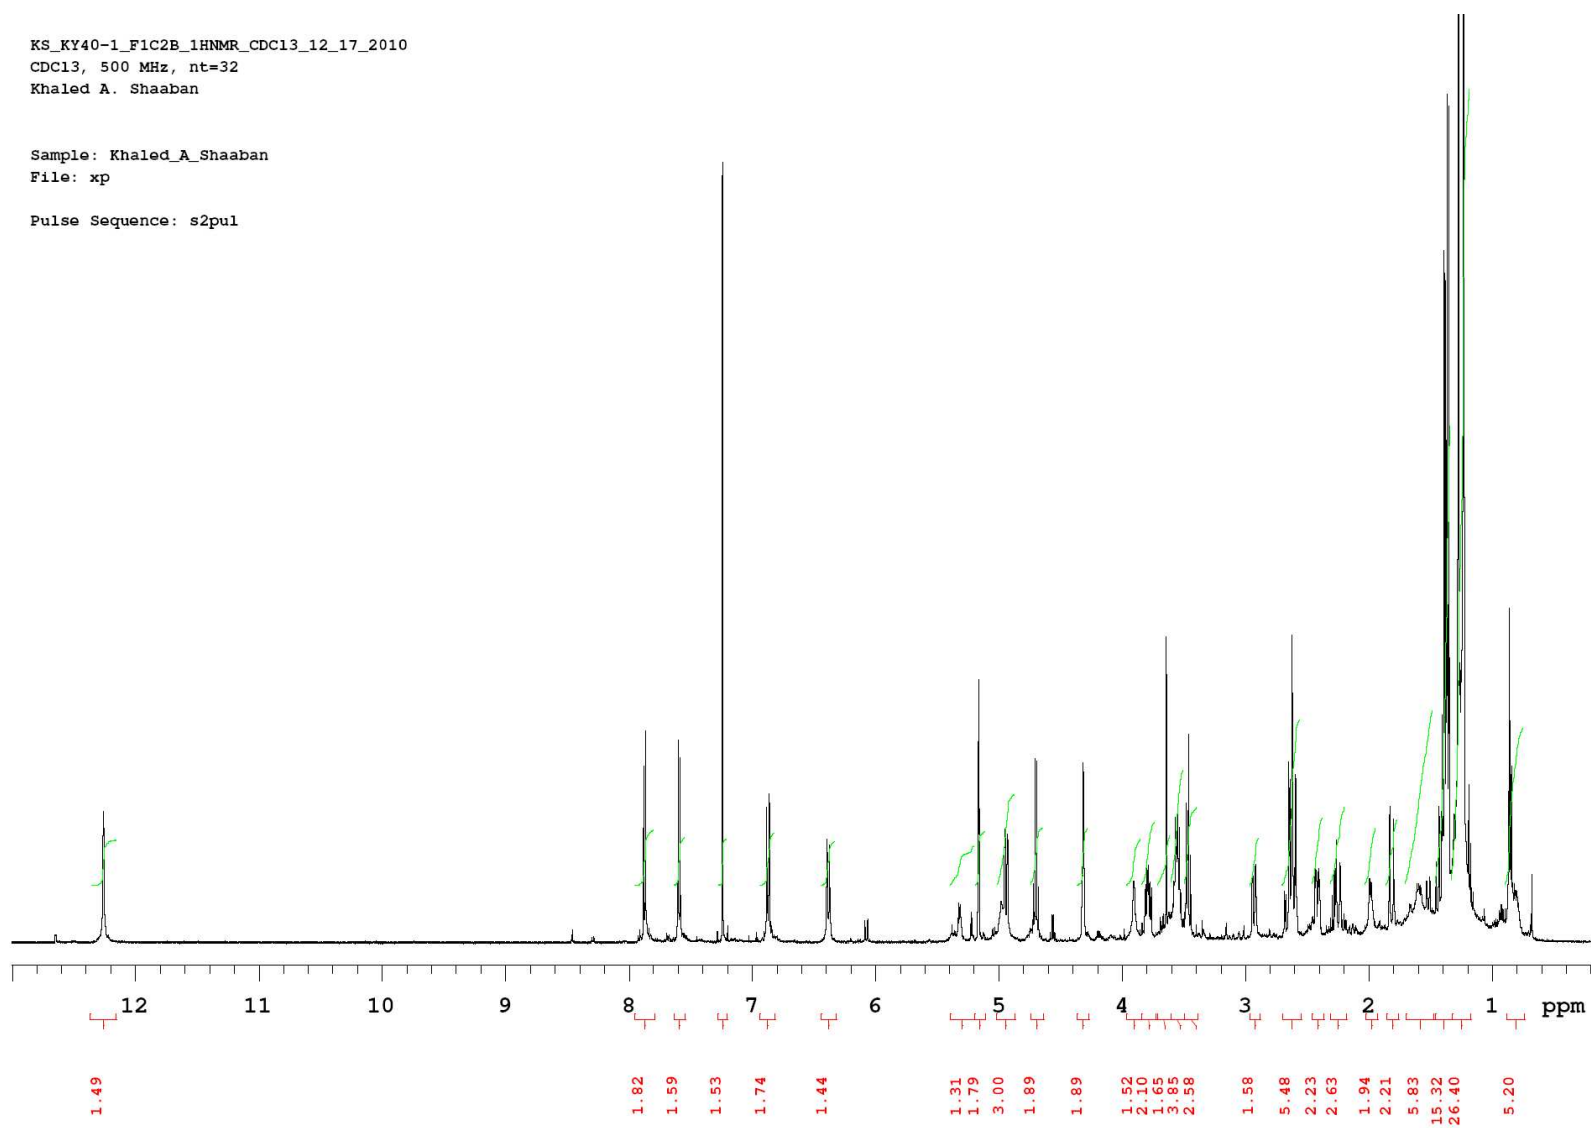

Figure S48: <sup>1</sup>H NMR spectrum (CDCl<sub>3</sub>, 500 MHz) of saquayamycin B1 (6)

KS\_KY40-1\_F1C2E\_13CNMR\_CDC13\_12\_28\_2010  
 CDC13, 125 MHz, time=24 hrs  
 Khaled A. Shaaban

exp2 Carbon

| SAMPLE      |             | SPECIAL    |             |
|-------------|-------------|------------|-------------|
| date        | Dec 27 2010 | temp       | not used    |
| solvent     | cdcl3       | gain       | 30          |
| file        | exp         | spin       | 20          |
| ACQUISITION |             | hst        | 0.008       |
| sw          | 30487.8     | pw90       | 11.900      |
| at          | 1.300       | alfa       | 10.000      |
| np          | 79298       | FLAGS      |             |
| fb          | 17000       | il         | n           |
| bs          | 64          | in         | n           |
| d1          | 1.000       | dp         | y           |
| nt          | 64000       | hs         | nn          |
| ct          | 37696       | PROCESSING |             |
| TRANSMITTER |             | lb         | 0.50        |
| tn          | C13         | fn         | not used    |
| sfrq        | 125.665     | DISPLAY    |             |
| tof         | 1285.1      | sp         | -2022.9     |
| tpwr        | 59          | wp         | 30487.3     |
| pw          | 5.950       | rfl        | 11727.4     |
| DECOUPLER   |             | rfp        | 9704.1      |
| dn          | H1          | rp         | 149.6       |
| dof         | 0           | lp         | -64.6       |
| dm          | YYY         | PLOT       |             |
| dmm         | w           | wc         | 250         |
| dpwr        | 35          | sc         | 0           |
| dmf         | 11448       | vs         | 1.19538e+06 |
|             |             | th         | 5           |
|             |             | ai         | cdc ph      |

| INDEX | FREQUENCY | PPM     | HEIGHT |
|-------|-----------|---------|--------|
| 1     | 26135.6   | 208.001 | 9.2    |
| 2     | 25775.1   | 205.132 | 5.3    |
| 3     | 23644.0   | 188.171 | 8.4    |
| 4     | 19875.8   | 158.182 | 9.0    |
| 5     | 18162.4   | 144.546 | 10.5   |
| 6     | 17461.4   | 138.967 | 8.0    |
| 7     | 17381.8   | 138.334 | 7.7    |
| 8     | 17367.9   | 138.223 | 9.4    |
| 9     | 16833.8   | 133.972 | 13.2   |
| 10    | 16406.3   | 130.570 | 8.0    |
| 11    | 15077.2   | 119.992 | 13.5   |
| 12    | 14788.8   | 117.697 | 12.5   |
| 13    | 14344.0   | 114.157 | 6.8    |
| 14    | 11507.2   | 91.580  | 13.6   |
| 15    | 10145.5   | 80.744  | 9.7    |
| 16    | 9797.6    | 77.974  | 16.4   |
| 17    | 9736.1    | 77.485  | 330.4  |
| 18    | 9704.1    | 77.230  | 329.1  |
| 19    | 9672.4    | 76.978  | 326.4  |
| 20    | 9661.3    | 76.889  | 16.1   |
| 21    | 9582.2    | 76.260  | 12.3   |
| 22    | 9395.2    | 74.772  | 15.9   |
| 23    | 9380.7    | 74.657  | 17.1   |
| 24    | 9002.1    | 71.643  | 12.5   |
| 25    | 8964.4    | 71.343  | 14.9   |
| 26    | 6570.9    | 52.295  | 10.0   |
| 27    | 5452.1    | 43.390  | 10.6   |
| 28    | 5047.3    | 40.169  | 10.9   |
| 29    | 4635.2    | 36.889  | 12.9   |
| 30    | 4038.3    | 32.139  | 5.6    |
| 31    | 3828.0    | 30.465  | 12.6   |
| 32    | 3758.2    | 29.910  | 31.3   |
| 33    | 3710.8    | 29.532  | 6.6    |
| 34    | 2878.5    | 22.909  | 7.3    |
| 35    | 2220.7    | 17.674  | 16.9   |
| 36    | 2058.4    | 16.382  | 20.1   |
| 37    | 1803.0    | 14.349  | 7.8    |

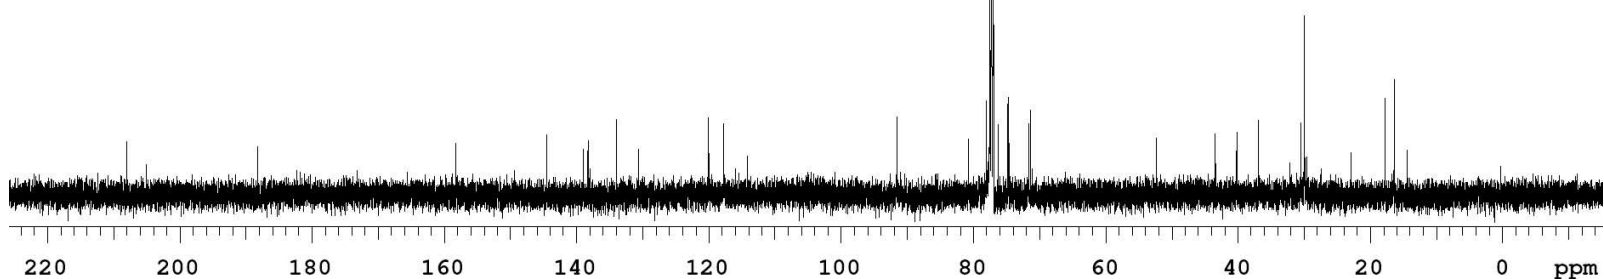

Figure S49:  $^{13}\text{C}$  NMR spectrum ( $\text{CDCl}_3$ , 125 MHz) of saquayamycin B1 (6)

KS\_KY40-1\_F1C2B\_gCOSY\_CDC13\_12\_17\_2010  
CDC13, 500 MHz, nt=4, time = 38 mins  
Khaled A. Shaaban

Sample: Khaled\_A\_Shaaban  
File: xp

Pulse Sequence: gCOSY

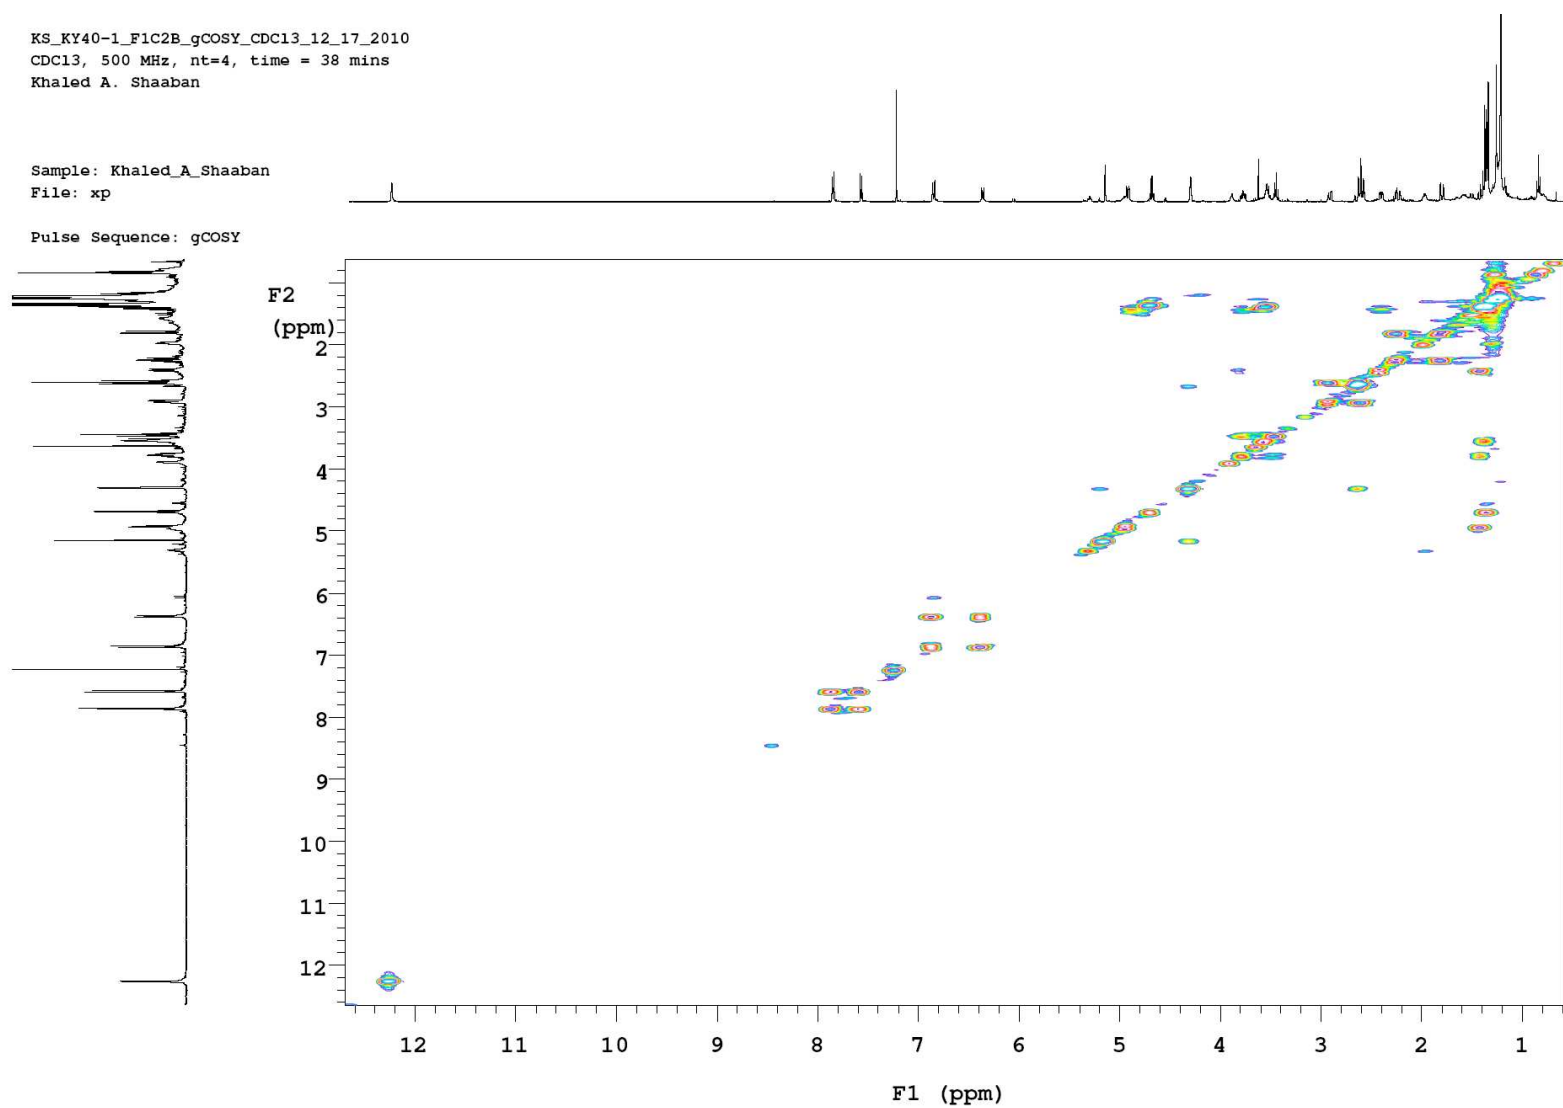

**Figure S50:**  $^1\text{H}$ - $^1\text{H}$  COSY spectrum ( $\text{CDCl}_3$ , 500 MHz) of saquayamycin B1 (**6**)

CDC13, 500 MHz, nt=8, time=5 hrs  
Khaled A. Shaaban

Sample: Khaled\_A\_Shaaban  
File: xp

Pulse Sequence: gHSQC

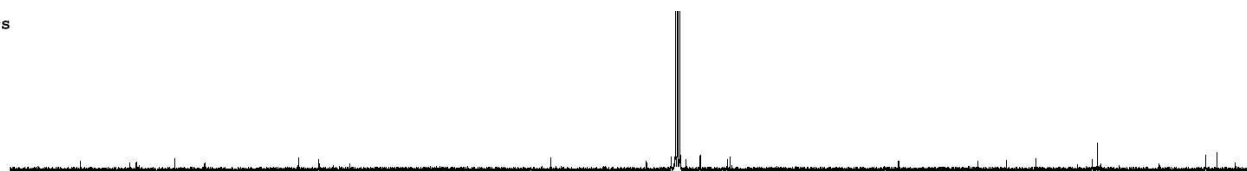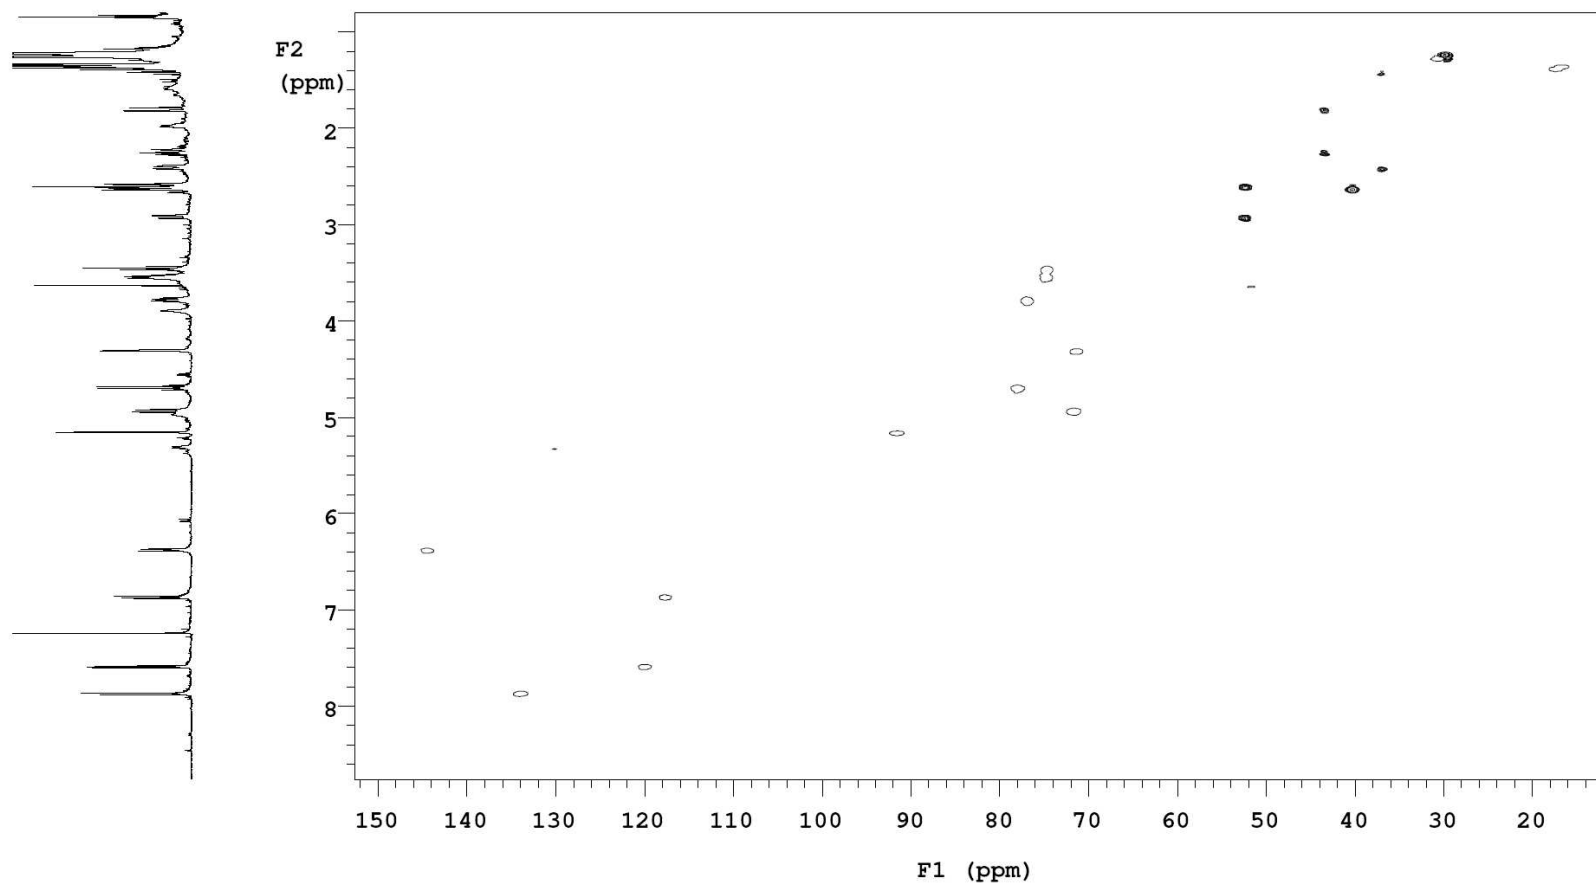

**Figure S51:** HSQC spectrum ( $\text{CDCl}_3$ , 500 MHz) of saquayamycin B1 (**6**)

CDCl<sub>3</sub>, 500 MHz, nt=32, time=10:37 hrs  
Khaled A. Shaaban

Sample: Khaled\_A\_Shaaban  
File: xp

Pulse Sequence: gHMBC

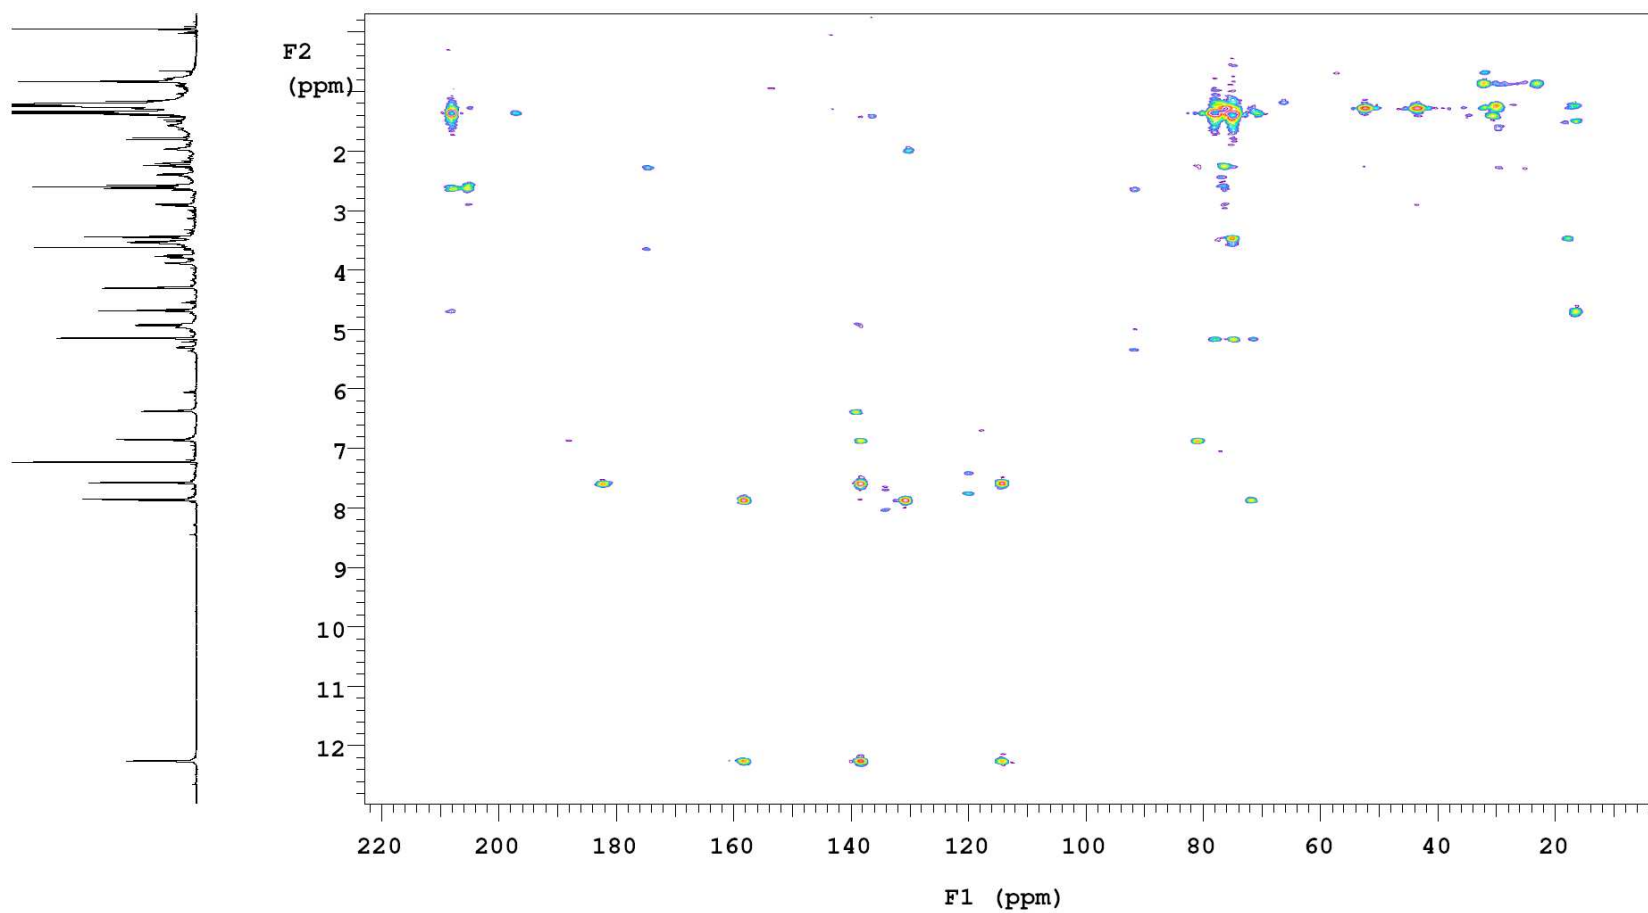

**Figure S52:** HMBC spectrum (CDCl<sub>3</sub>, 500 MHz) of saquayamycin B1 (**6**)

CDCl<sub>3</sub>, 500 MHz, nt=4, time=2 hrs  
Khaled A. Shaaban

Sample: Khaled\_A\_Shaaban  
File: xp

Pulse Sequence: NOESY

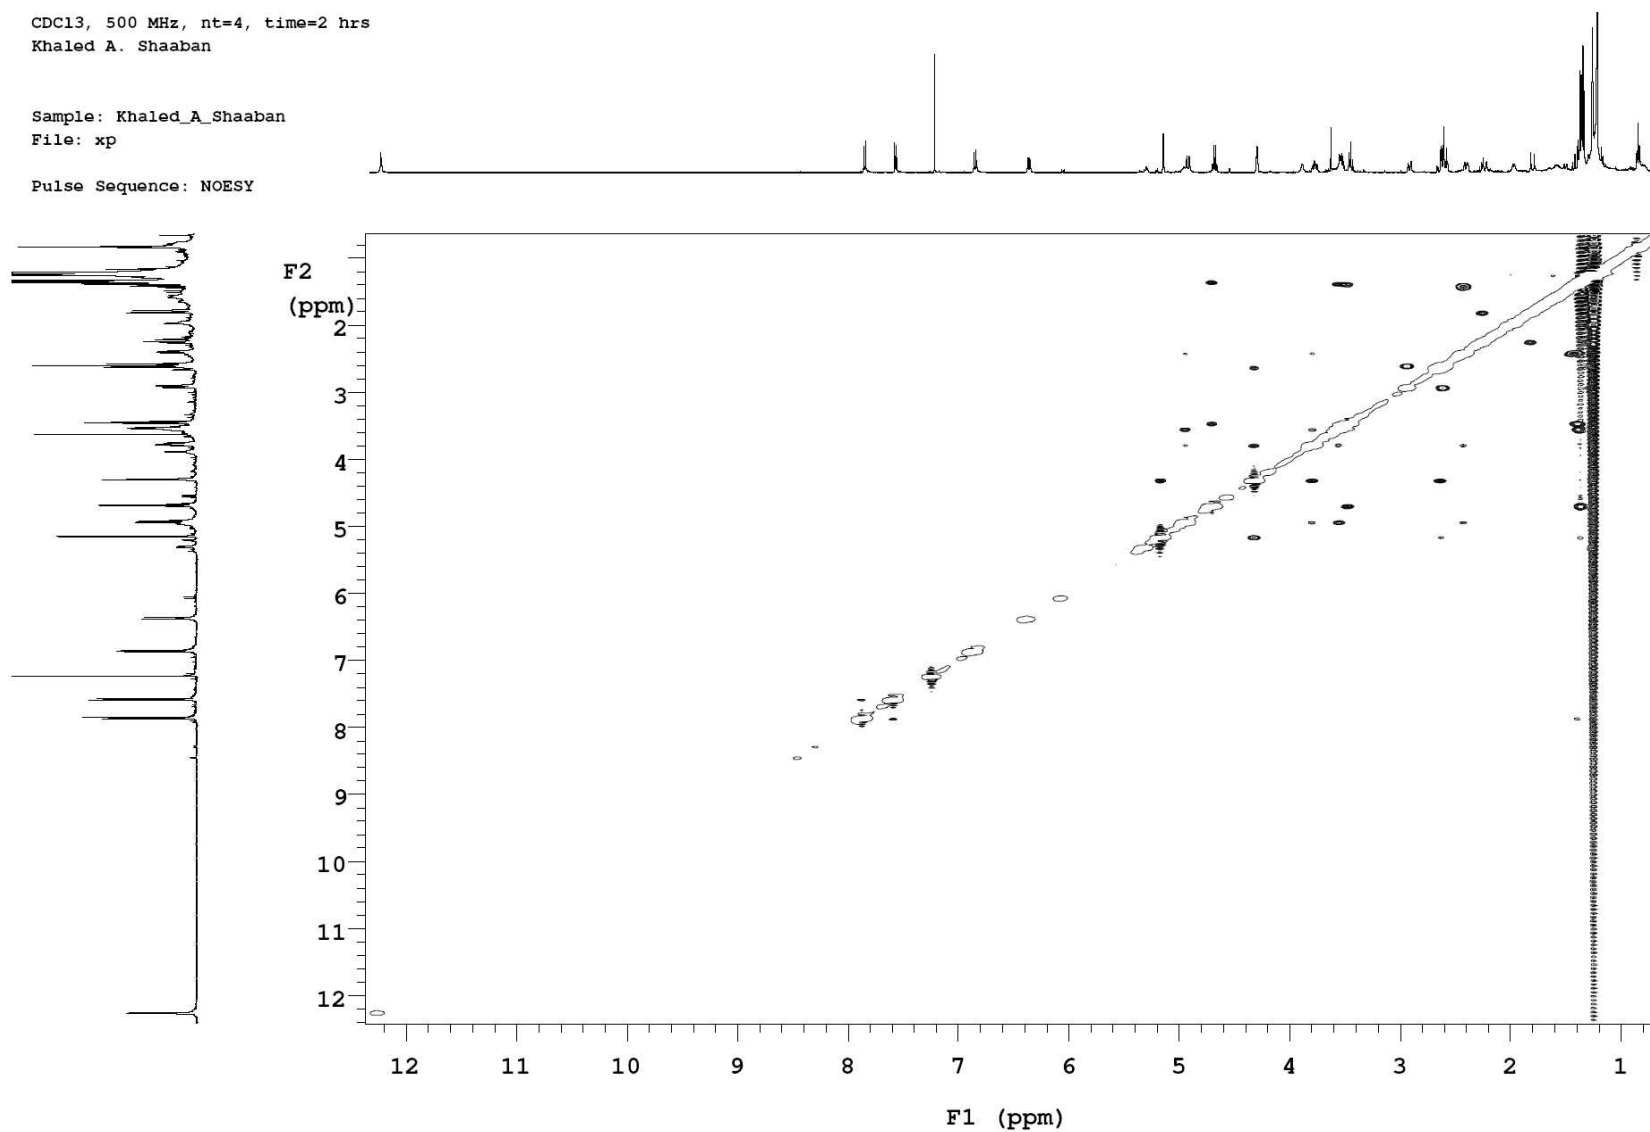

**Figure S53:** NOESY spectrum (CDCl<sub>3</sub>, 500 MHz) of saquayamycin B1 (**6**)

KS\_KY40-1\_F1D\_1HNMR\_CDC13\_12\_01\_2010  
CDC13, 500 MHz, nt=32  
Khaled A. Shaaban

Sample: khaled\_A\_Shaaban  
File: xp

Pulse Sequence: s2pul

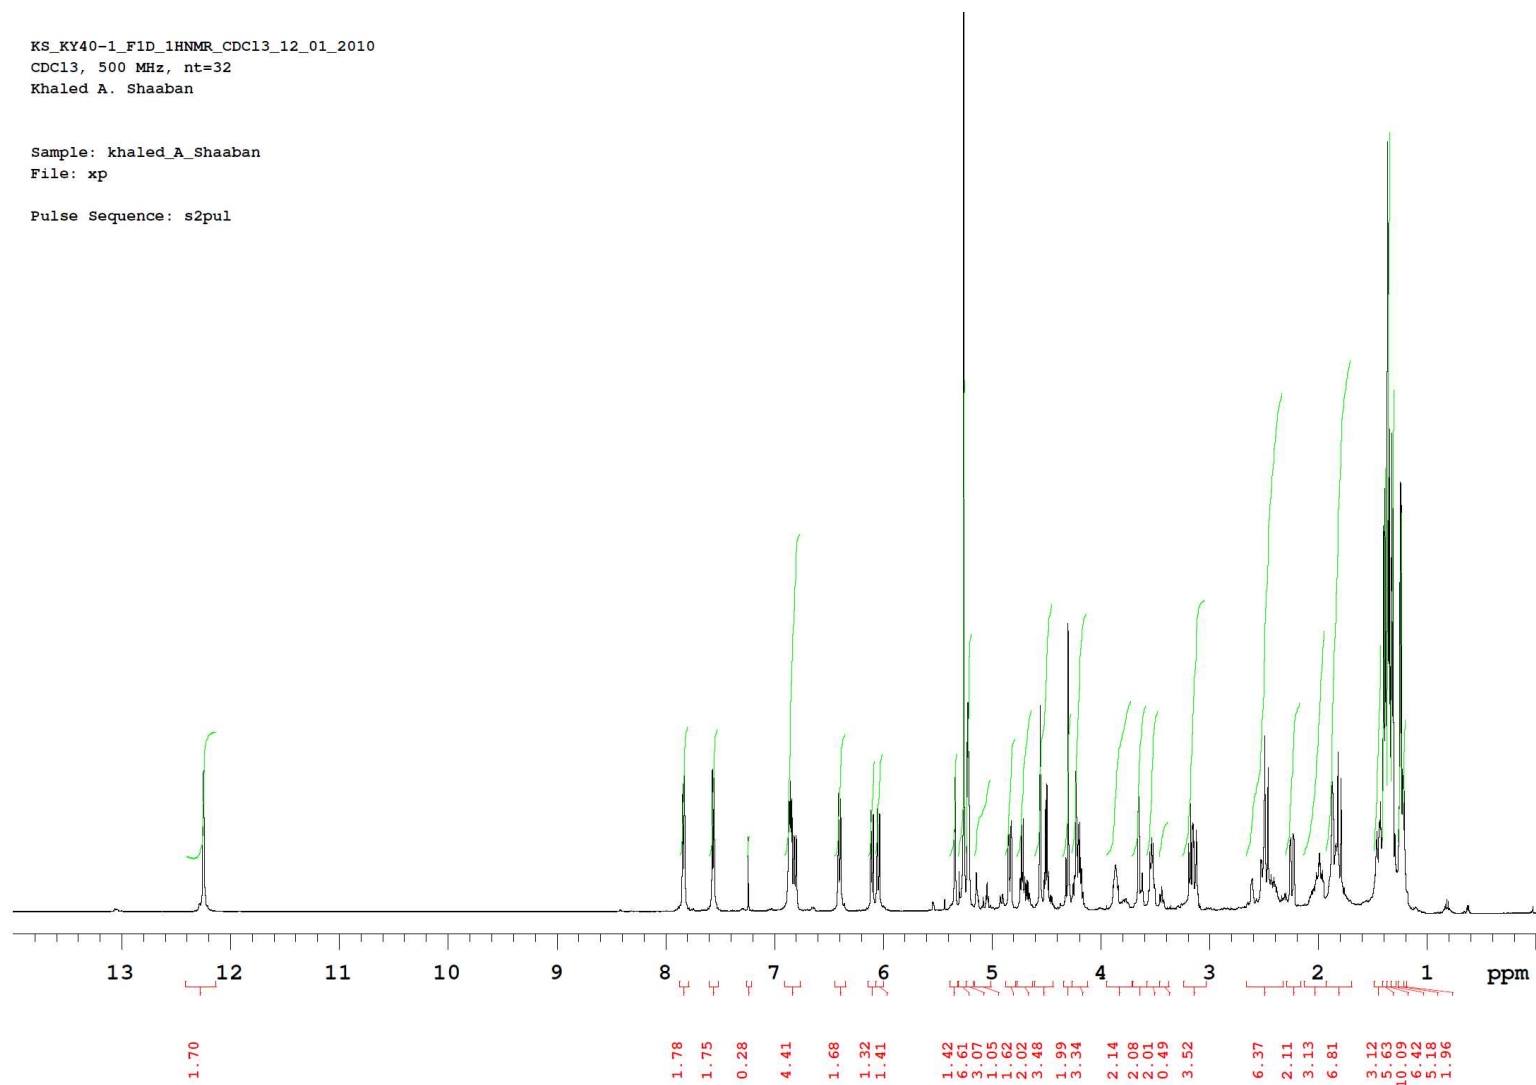

Figure S54: <sup>1</sup>H NMR spectrum (CDCl<sub>3</sub>, 500 MHz) of saquayamycin A (7)

KS\_KY40-1\_F1D\_13CNMR\_CDCl3\_12\_07\_2010  
 CDC13, 125 MHz, time= 10 hrs  
 Khaled A. Shaaban

expl0 Carbon

|             |            |            |          |
|-------------|------------|------------|----------|
| SAMPLE      |            | SPECIAL    |          |
| date        | Dec 6 2010 | temp       | not used |
| solvent     | cdcl3      | gain       | 30       |
| file        | exp        | spin       | 20       |
| ACQUISITION |            | hst        | 0.008    |
| sw          | 30487.8    | pw90       | 11.900   |
| at          | 1.300      | alfa       | 10.000   |
| np          | 79298      | FLAGS      |          |
| fb          | 17000      | il         | n        |
| bs          | 64         | in         | n        |
| d1          | 1.000      | dp         | y        |
| nt          | 100000     | hs         | nn       |
| ct          | 15424      | PROCESSING |          |
| TRANSMITTER |            | lb         | 0.50     |
| tn          | C13        | fn         | not used |
| sfrq        | 125.665    | DISPLAY    |          |
| tof         | 1285.1     | sp         | -1028.7  |
| tpwr        | 59         | wp         | 29432.7  |
| pw          | 5.950      | rfl        | 11736.7  |
| DECOUPLER   |            | rfp        | 9704.1   |
| dn          | H1         | rp         | -76.1    |
| dof         | 0          | lp         | 19.6     |
| dm          | yyy        | PLOT       |          |
| dmm         | w          | wc         | 250      |
| dpwr        | 35         | sc         | 0        |
| dmf         | 11448      | vs         | 377449   |
|             |            | th         | 9        |
|             |            | ai         | cdc ph   |

| INDEX | FREQUENCY | PPM     | HEIGHT | INDEX | FREQUENCY | PPM    | HEIGHT |
|-------|-----------|---------|--------|-------|-----------|--------|--------|
| 1     | 25766.3   | 205.062 | 14.9   | 40    | 3120.9    | 24.838 | 19.4   |
| 2     | 24752.6   | 196.994 | 18.9   | 41    | 3098.6    | 24.660 | 16.2   |
| 3     | 24557.6   | 195.443 | 20.0   | 42    | 2325.9    | 18.510 | 34.5   |
| 4     | 23661.7   | 188.312 | 15.2   | 43    | 2172.8    | 17.292 | 39.0   |
| 5     | 22913.1   | 182.355 | 17.3   | 44    | 1924.9    | 15.319 | 38.5   |
| 6     | 19868.8   | 158.127 | 20.4   | 45    | 1922.5    | 15.301 | 40.3   |
| 7     | 18306.2   | 145.690 | 17.8   |       |           |        |        |
| 8     | 18000.1   | 143.254 | 23.4   |       |           |        |        |
| 9     | 17888.9   | 142.369 | 21.5   |       |           |        |        |
| 10    | 17454.9   | 138.915 | 23.9   |       |           |        |        |
| 11    | 17380.4   | 138.323 | 14.7   |       |           |        |        |
| 12    | 16794.3   | 133.658 | 17.3   |       |           |        |        |
| 13    | 16407.2   | 130.577 | 17.2   |       |           |        |        |
| 14    | 16008.1   | 127.401 | 38.8   |       |           |        |        |
| 15    | 15051.1   | 119.785 | 20.3   |       |           |        |        |
| 16    | 14775.3   | 117.589 | 18.9   |       |           |        |        |
| 17    | 14330.5   | 114.050 | 18.8   |       |           |        |        |
| 18    | 11987.8   | 95.405  | 31.2   |       |           |        |        |
| 19    | 11967.3   | 95.242  | 27.6   |       |           |        |        |
| 20    | 11626.3   | 92.528  | 26.9   |       |           |        |        |
| 21    | 11226.2   | 89.344  | 24.3   |       |           |        |        |
| 22    | 10388.4   | 82.676  | 28.8   |       |           |        |        |
| 23    | 10063.7   | 80.092  | 28.5   |       |           |        |        |
| 24    | 9744.5    | 77.552  | 33.3   |       |           |        |        |
| 25    | 9736.2    | 77.485  | 407.2  |       |           |        |        |
| 26    | 9704.1    | 77.230  | 419.6  |       |           |        |        |
| 27    | 9672.0    | 76.975  | 413.9  |       |           |        |        |
| 28    | 9585.9    | 76.290  | 24.9   |       |           |        |        |
| 29    | 9358.9    | 74.483  | 22.5   |       |           |        |        |
| 30    | 8999.3    | 71.621  | 26.4   |       |           |        |        |
| 31    | 8970.4    | 71.391  | 22.6   |       |           |        |        |
| 32    | 8943.9    | 71.180  | 23.3   |       |           |        |        |
| 33    | 8885.3    | 70.714  | 27.2   |       |           |        |        |
| 34    | 8424.7    | 67.048  | 23.8   |       |           |        |        |
| 35    | 6737.4    | 53.620  | 25.1   |       |           |        |        |
| 36    | 6320.1    | 50.299  | 15.4   |       |           |        |        |
| 37    | 5604.2    | 44.601  | 14.6   |       |           |        |        |
| 38    | 4898.9    | 38.988  | 17.7   |       |           |        |        |
| 39    | 3212.1    | 25.564  | 23.9   |       |           |        |        |

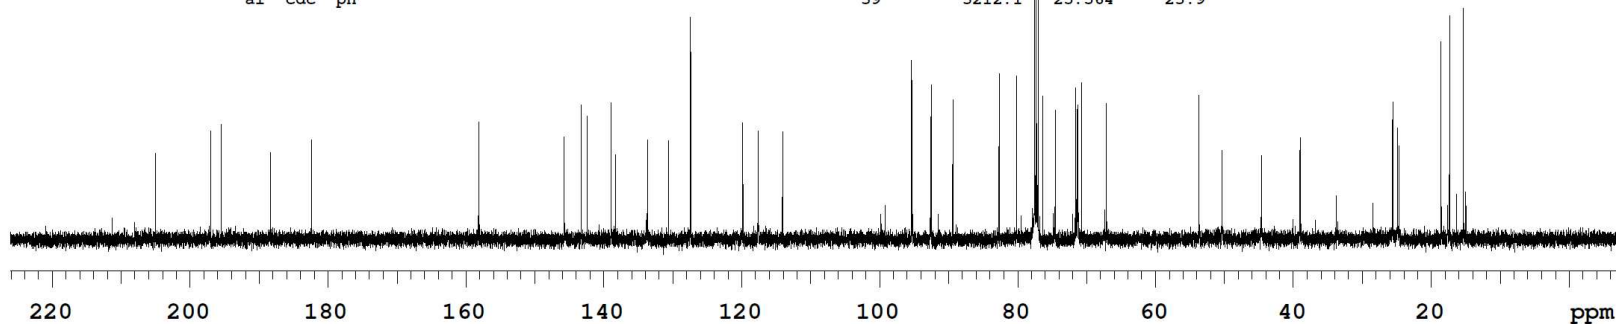

Figure S55: <sup>13</sup>C NMR spectrum (CDCl<sub>3</sub>, 125 MHz) of saquayamycin A (7)



KS\_KY40-1\_F1D\_gCOSY\_CDCl3\_12\_13\_2010  
CDCl3, 500 MHz, nt=4, time = 1:18 hrs  
Khaled A. Shaaban

Sample: Khaled\_A\_Shaaban  
File: xp

Pulse Sequence: gCOSY

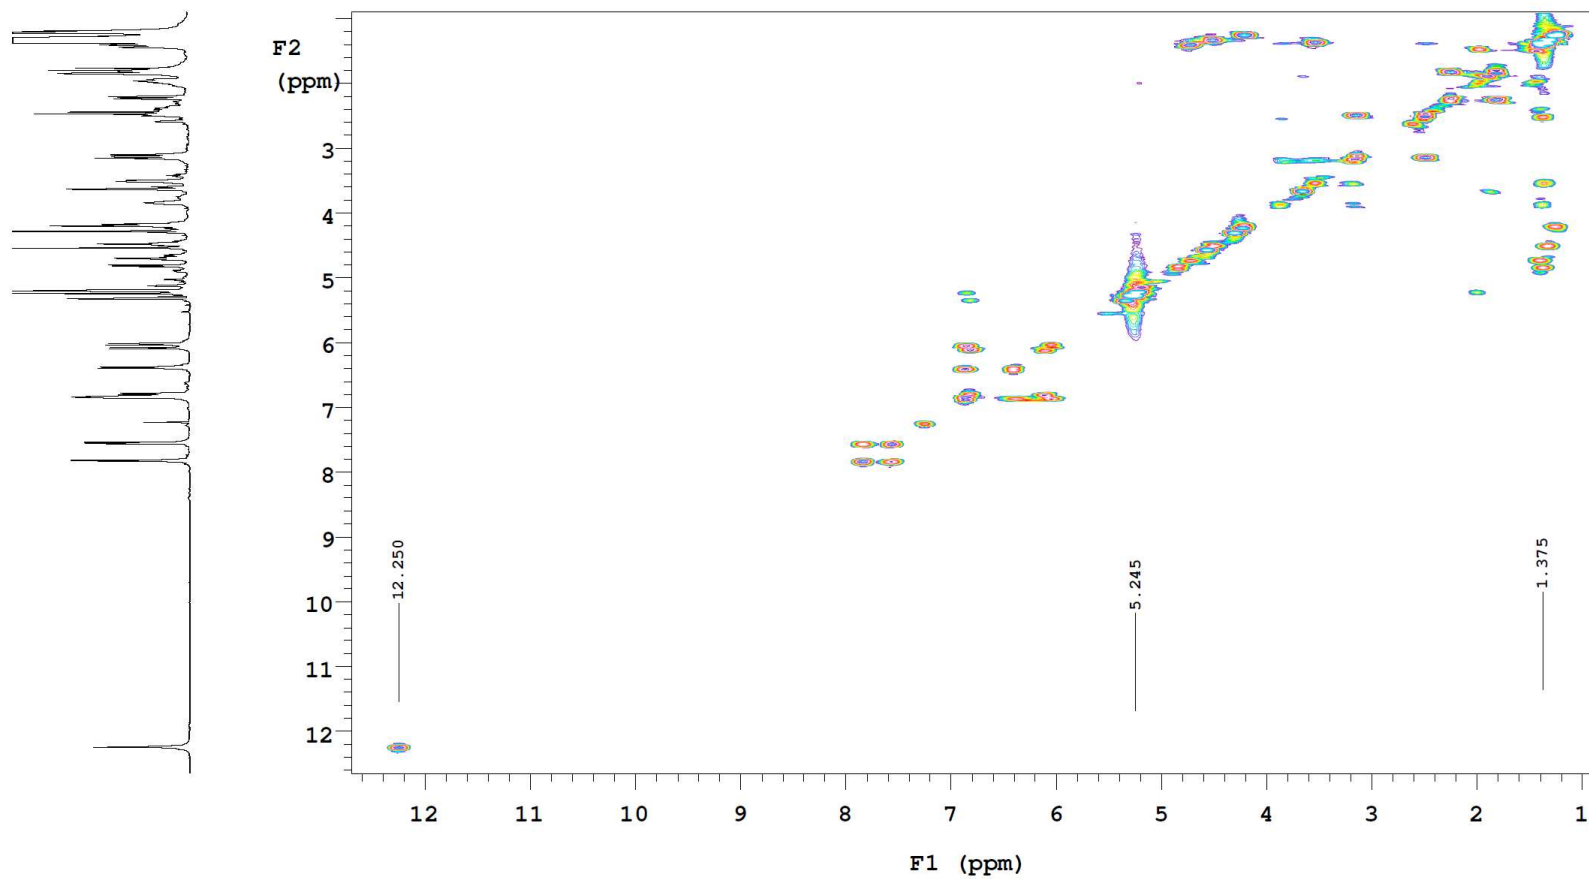

**Figure S56:** <sup>1</sup>H-<sup>1</sup>H COSY spectrum (CDCl<sub>3</sub>, 500 MHz) of saquayamycin A (7)

KS\_KY40-1\_F1D\_gHSQC\_CDCl3\_12\_14\_2010  
CDCl3, 500 MHz, nt=4, time = 1:17 hrs  
Khaled A. Shaaban

Sample: Khaled\_A\_Shaaban  
File: xp

Pulse Sequence: gHSQC

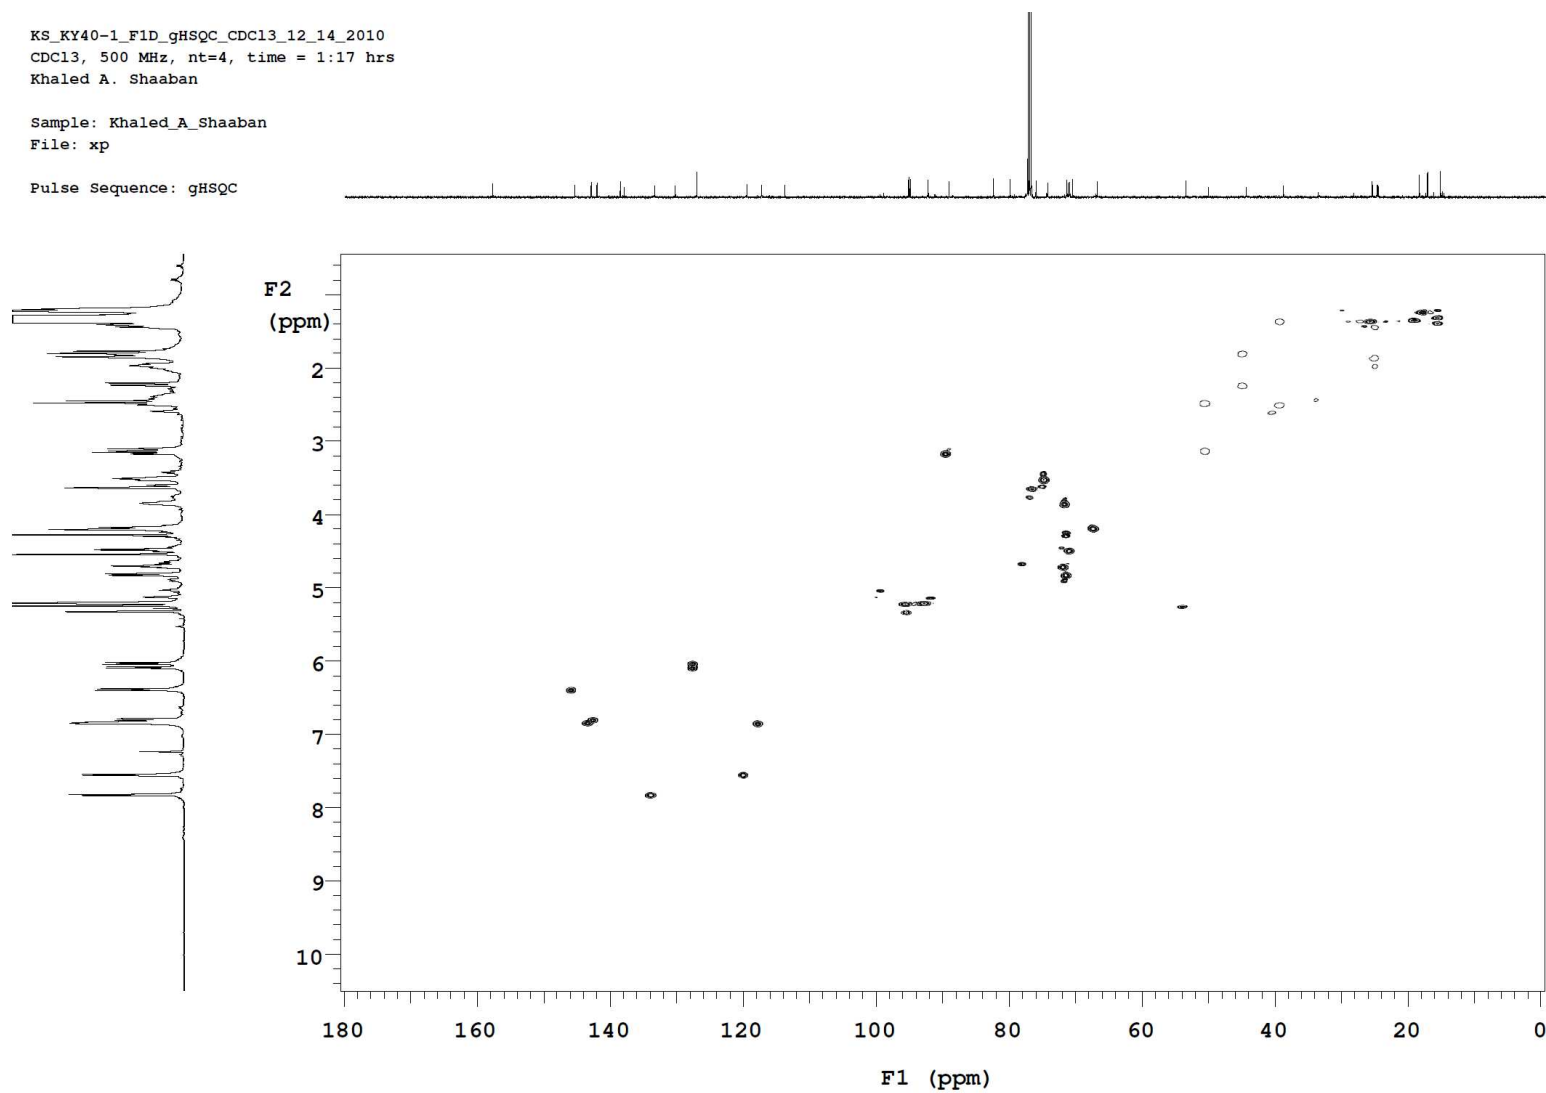

**Figure S57:** HSQC spectrum (CDCl<sub>3</sub>, 500 MHz) of saquayamycin A (7)

KS\_KY40-1\_F1D\_GHMBC\_CDCl3\_12\_13\_2010  
CDCl3, 500 MHz, nt=32, time = 11:18 hrs  
Khaled A. Shaaban

Sample: Khaled\_A\_Shaaban  
File: xp

Pulse Sequence: gHMBC

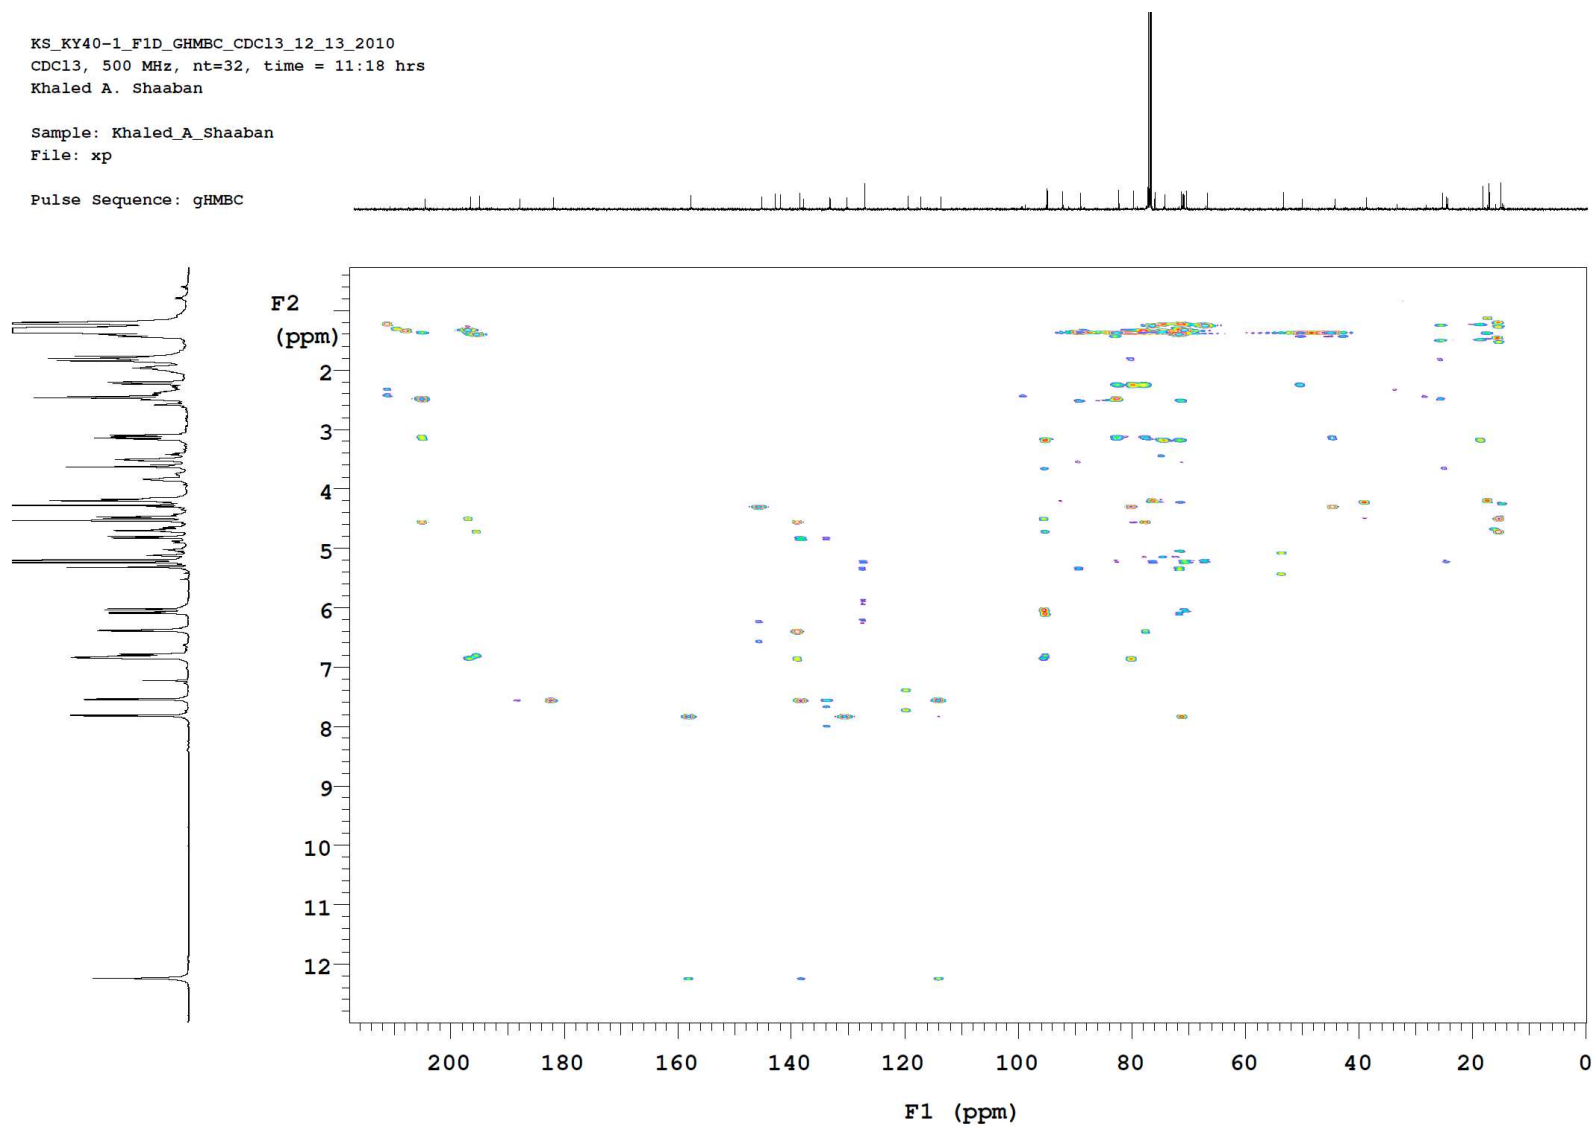

**Figure S58:** HMBC spectrum (CDCl<sub>3</sub>, 500 MHz) of saquayamycin A (7)

KS\_KY40-1\_F1D\_NOESY\_CDC13\_12\_14\_2010  
CDC13, 500 MHz, nt=4, time = 2:07 hrs  
Khaled A. Shaaban

Sample: Khaled\_A\_Shaaban  
File: xp

Pulse Sequence: NOESY

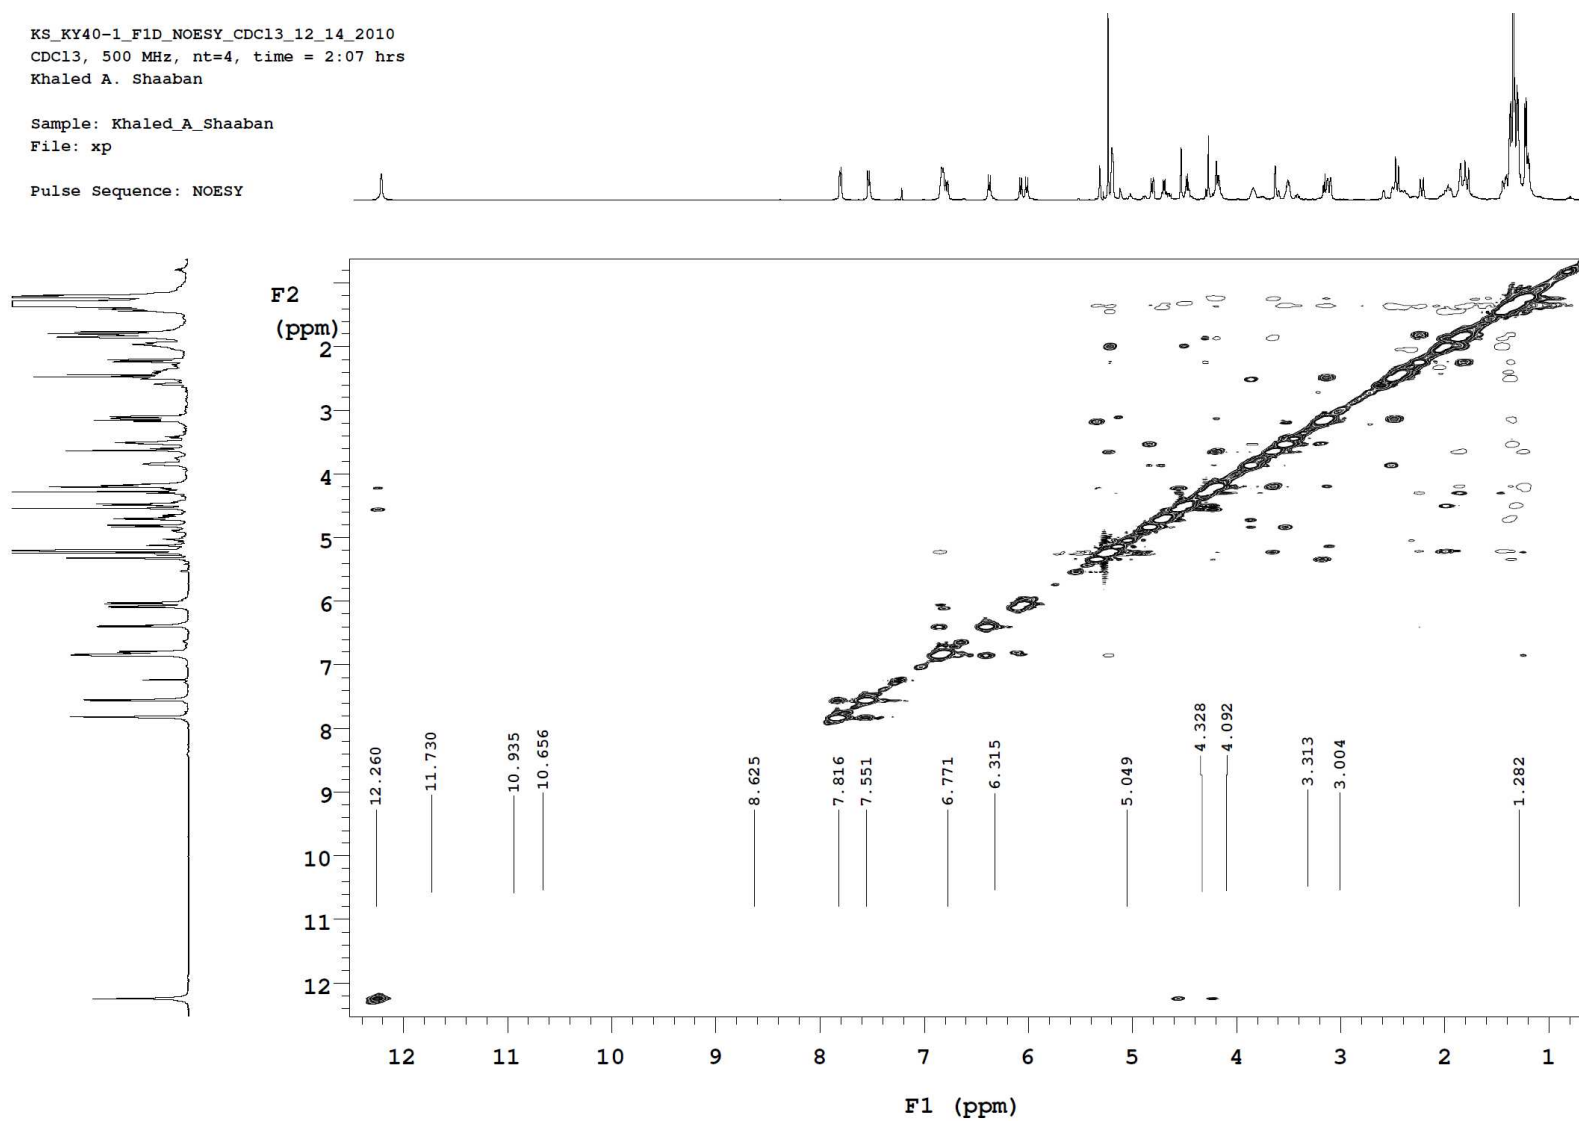

Figure S59: NOESY spectrum (CDCl<sub>3</sub>, 500 MHz) of saquayamycin A (7)

KS\_KY40-1\_F1E\_1HNMR\_CDC13\_12\_01\_2010  
CDC13, 500 MHz, nt=32  
Khaled A. Shaaban

Sample: khaled\_A\_Shaaban  
File: xp

Pulse Sequence: s2pu1

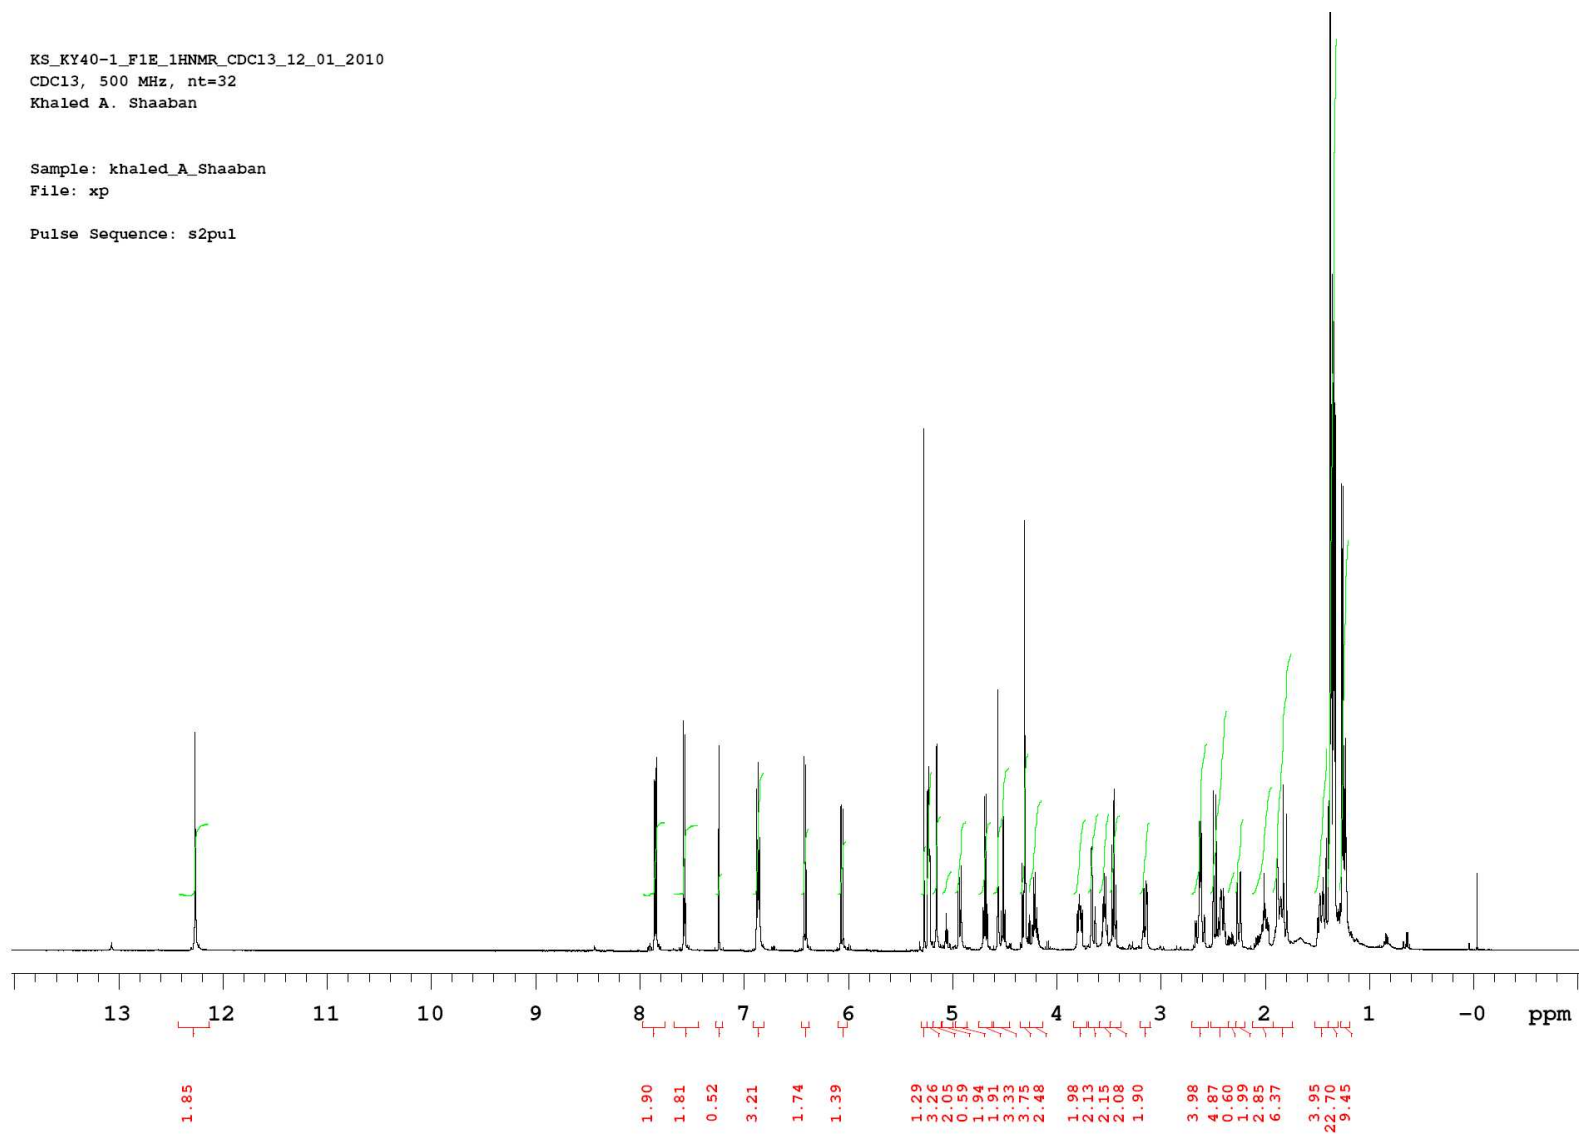

Figure S60: <sup>1</sup>H NMR spectrum (CDCl<sub>3</sub>, 500 MHz) of saquayamycin B (8)

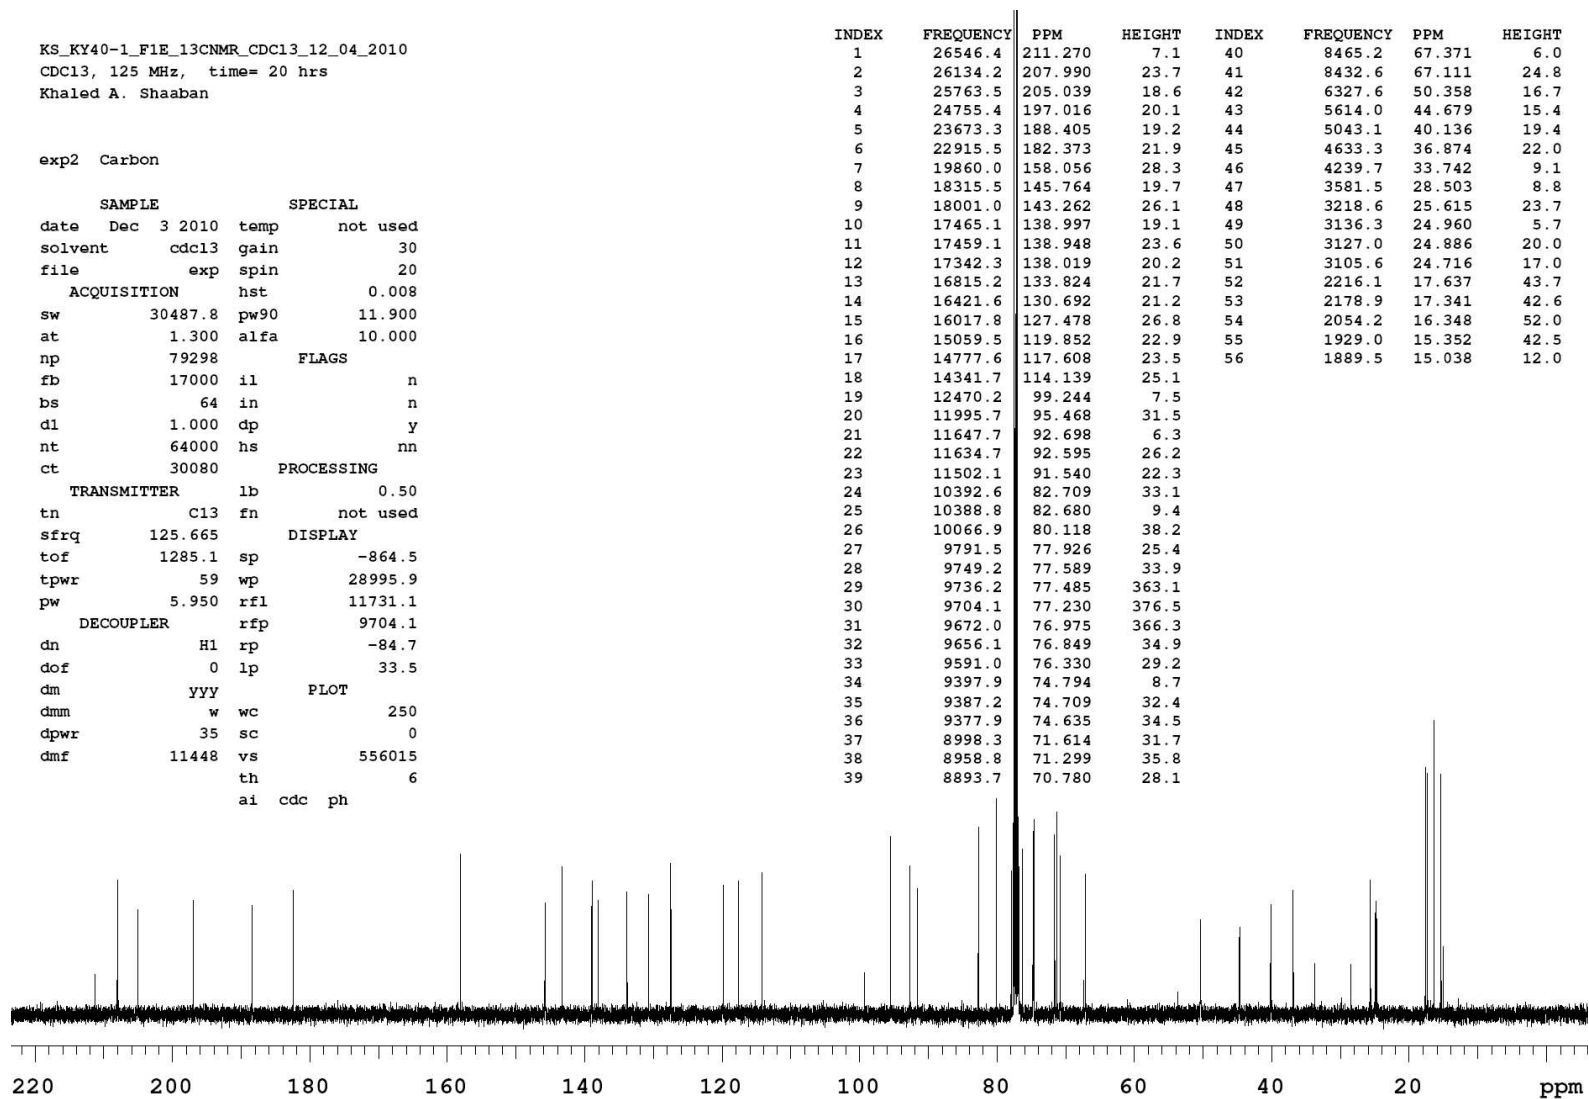

Figure S61:  $^{13}\text{C}$  NMR spectrum ( $\text{CDCl}_3$ , 125 MHz) of saquayamycin B (**8**)

KS\_KY40-1\_F1E\_gCOSY\_CDC13\_12\_01\_2010  
CDC13, 500 MHz, nt=8, time=2:36 hrs  
Khaled A. Shaaban

Sample: Khaled\_A\_Shaaban  
File: xp

Pulse Sequence: gCOSY

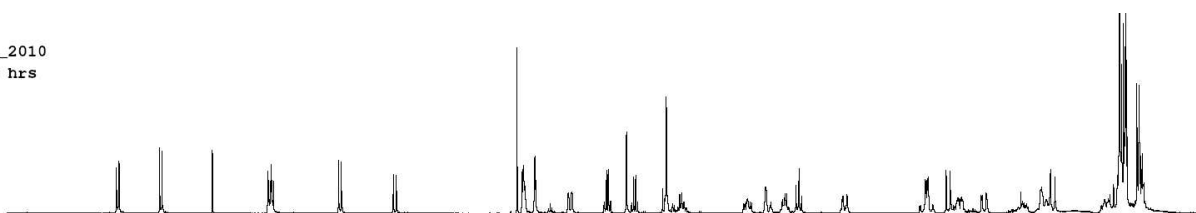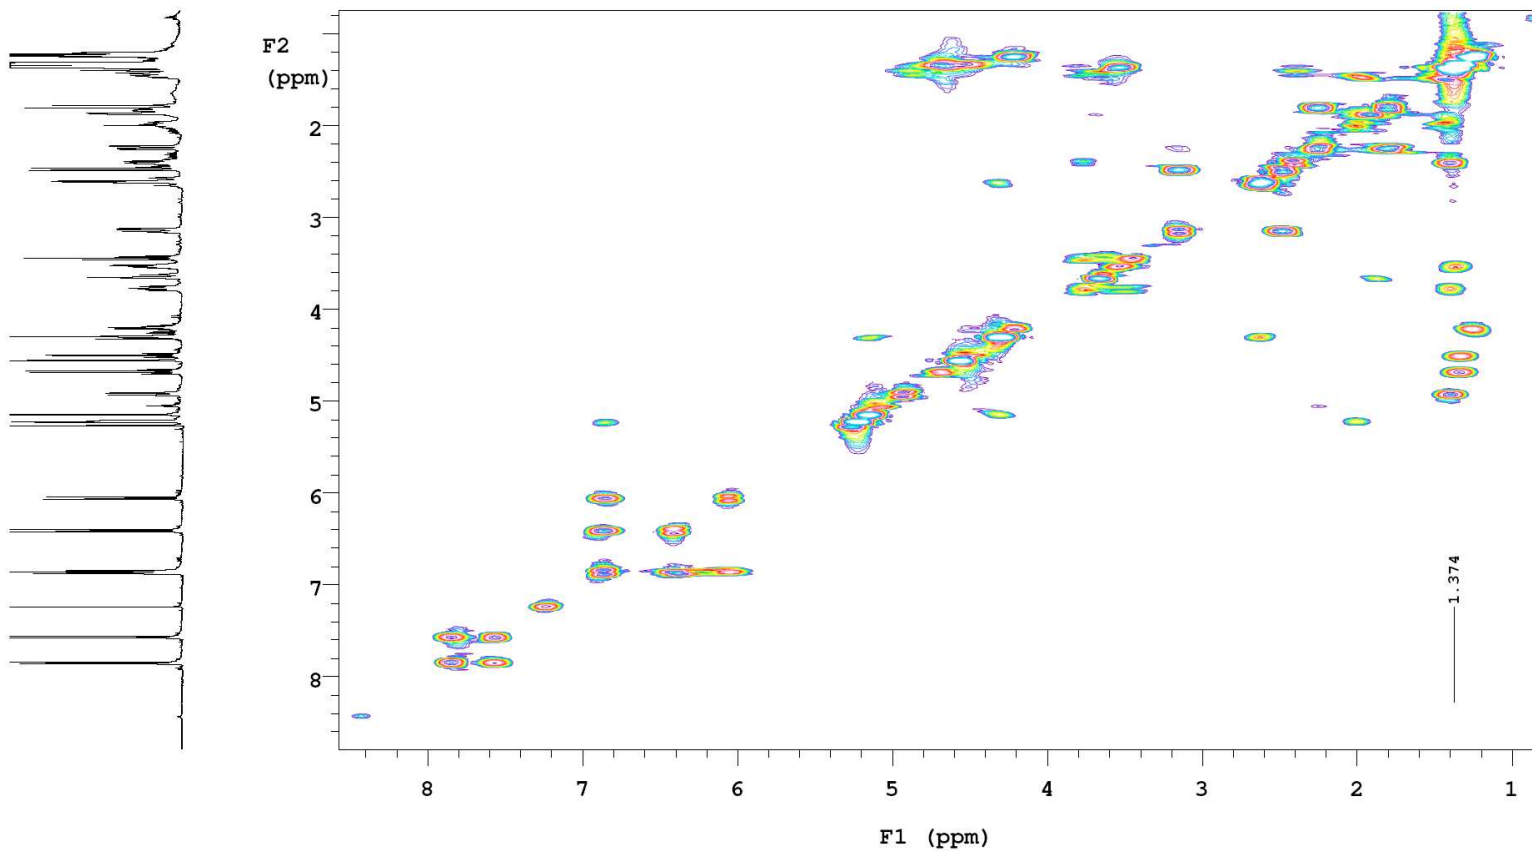

**Figure S62:**  $^1\text{H}$ - $^1\text{H}$  COSY spectrum ( $\text{CDCl}_3$ , 500 MHz) of saquayamycin B (**8**)

KS\_KY40-1\_F1E\_GHSQC\_CDC13\_12\_04\_2010  
CDC13, 500 MHz, nt=8, time=5:30 hrs  
Khaled A. Shaaban

Sample: Khaled\_A\_Shaaban  
File: xp

Pulse Sequence: gHSQC

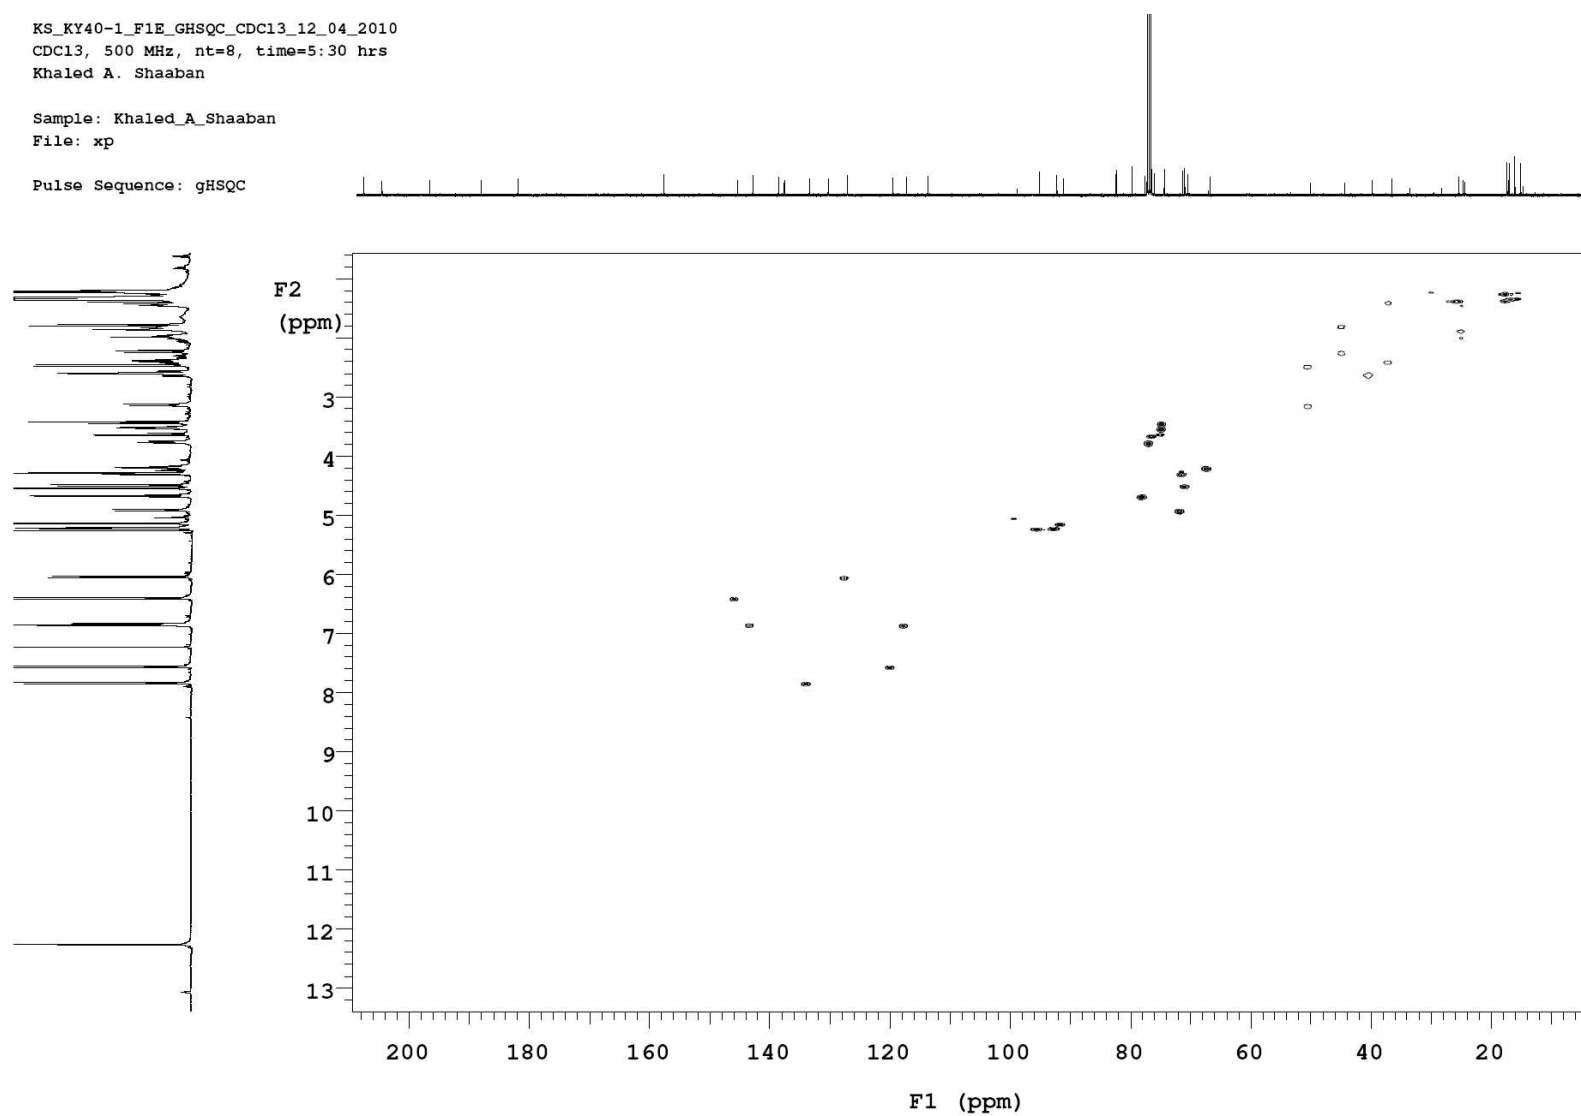

**Figure S63:** HSQC spectrum (CDCl<sub>3</sub>, 500 MHz) of saquayamycin B (**8**)



KS\_KY40-1\_F1E\_GHMB\_CDC13\_12\_05\_2010  
CDC13, 500 MHz, nt=32, time=11:15 hrs  
Khaled A. Shaaban

Sample: Khaled\_A\_Shaaban  
File: xp

Pulse Sequence: gHMBC

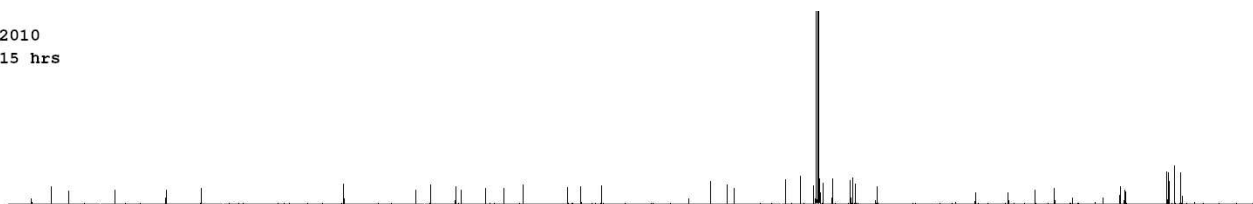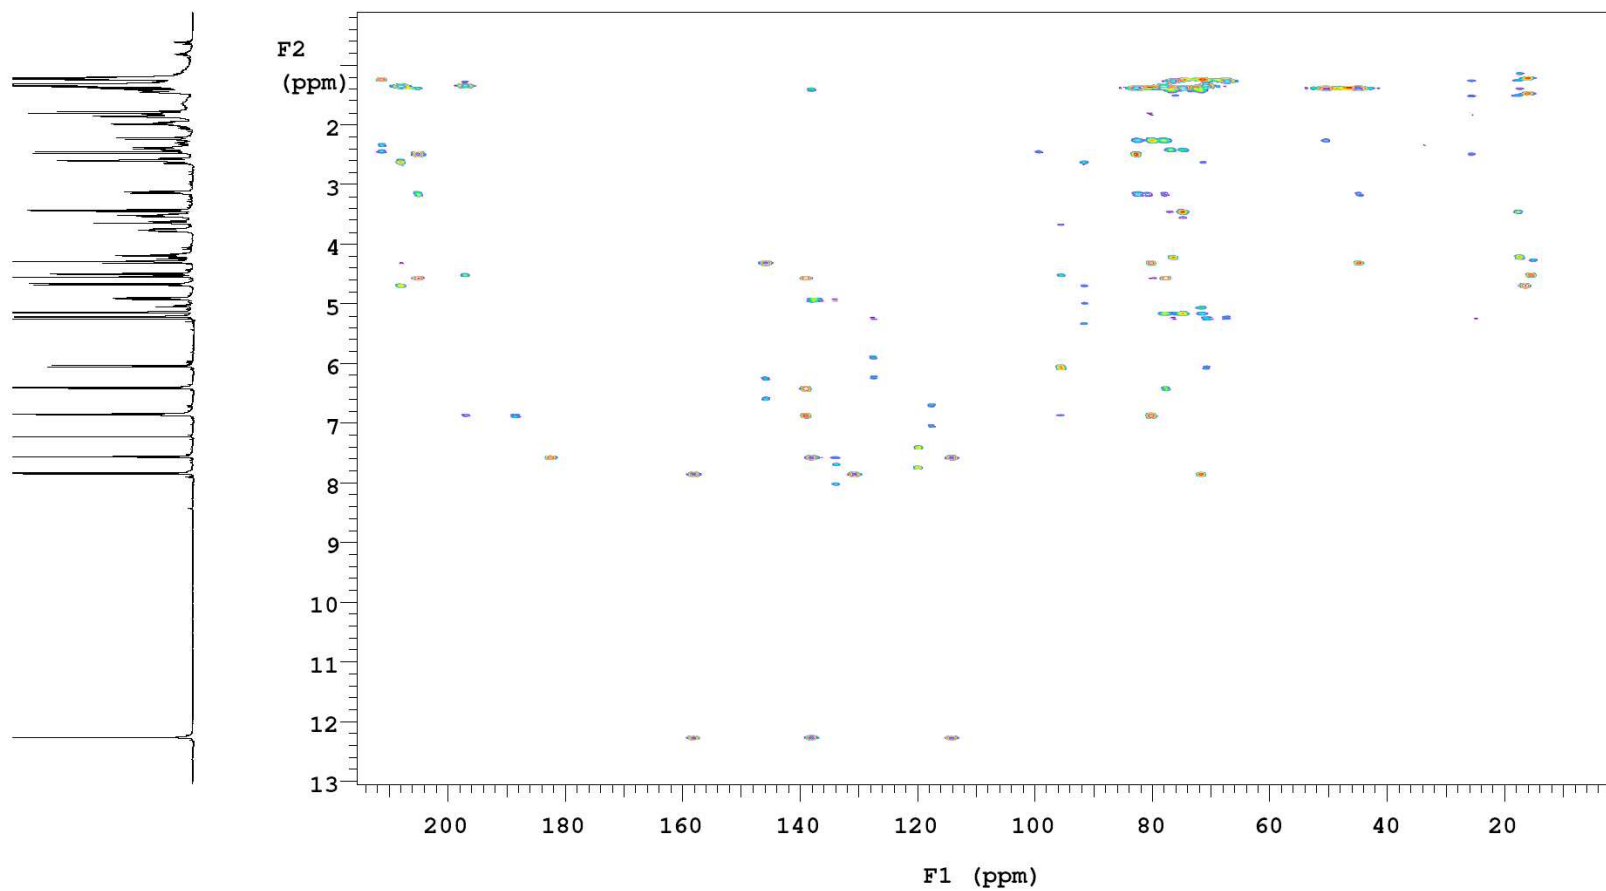

**Figure S64:** HMBC spectrum ( $\text{CDCl}_3$ , 500 MHz) of saquayamycin B (**8**)

KS\_KY40-1\_F1E\_NOESY\_CDCl3\_12\_05\_2010  
CDCl3, 500 MHz, nt=4, time=4:30 hrs  
Khaled A. Shaaban

Sample: Khaled\_A\_Shaaban  
File: xp

Pulse Sequence: NOESY

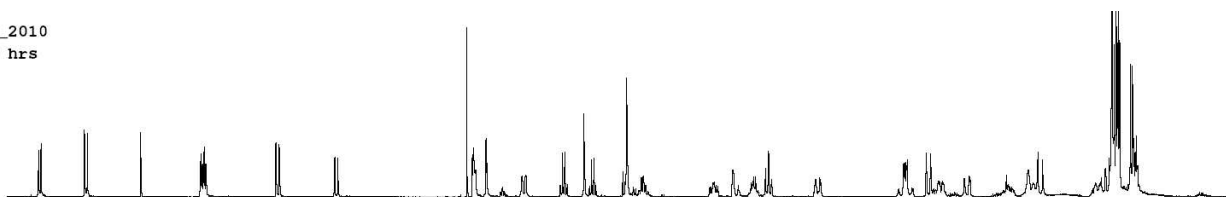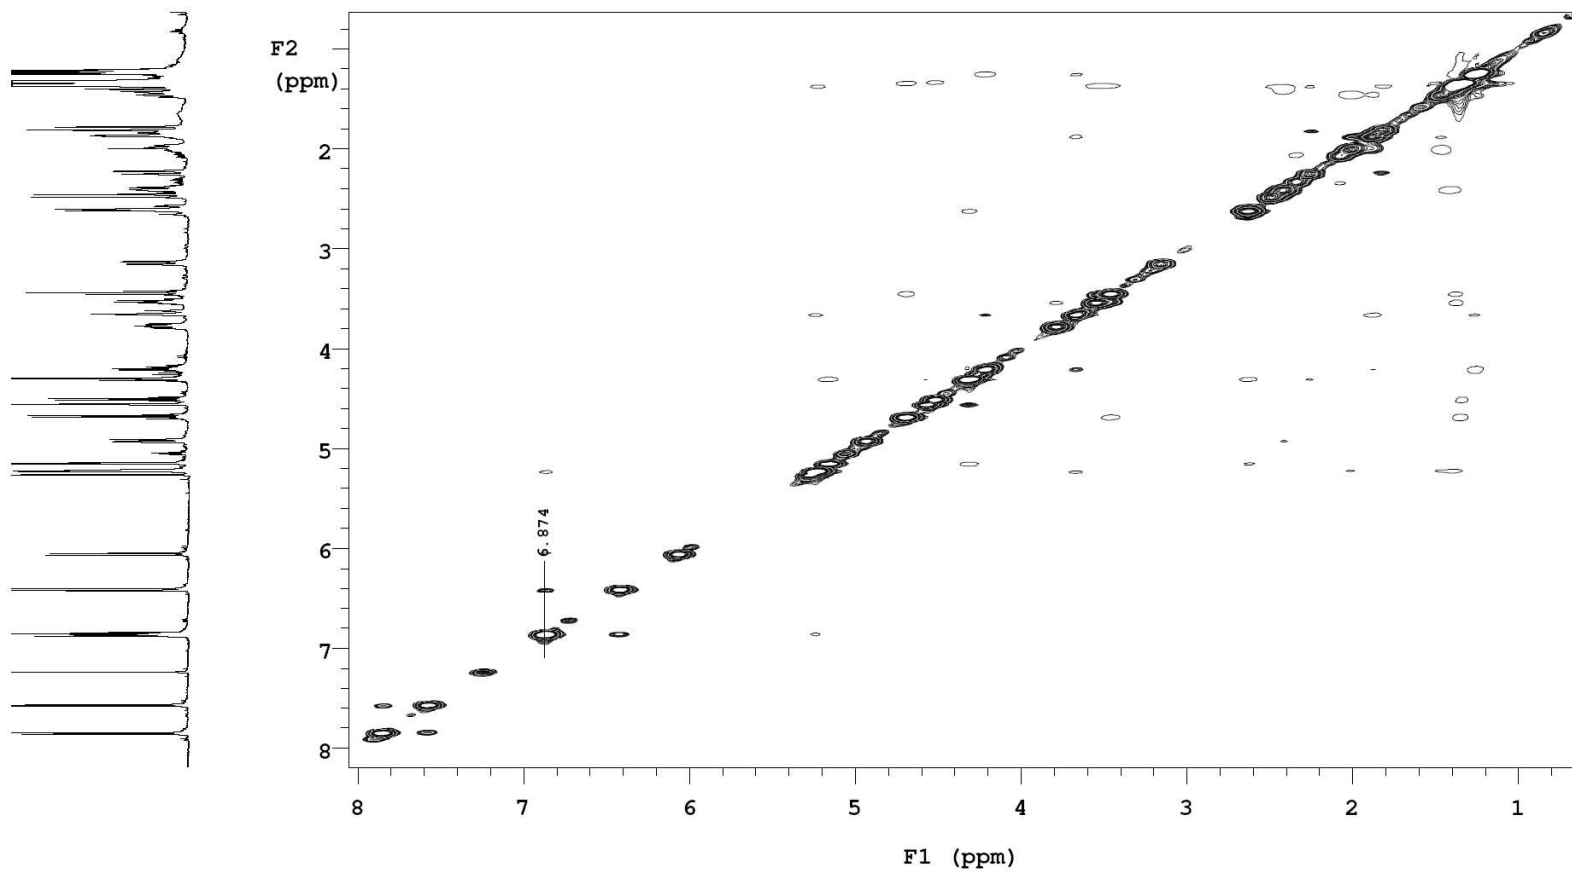

**Figure S65:** NOESY spectrum (CDCl<sub>3</sub>, 500 MHz) of saquayamycin B (**8**)

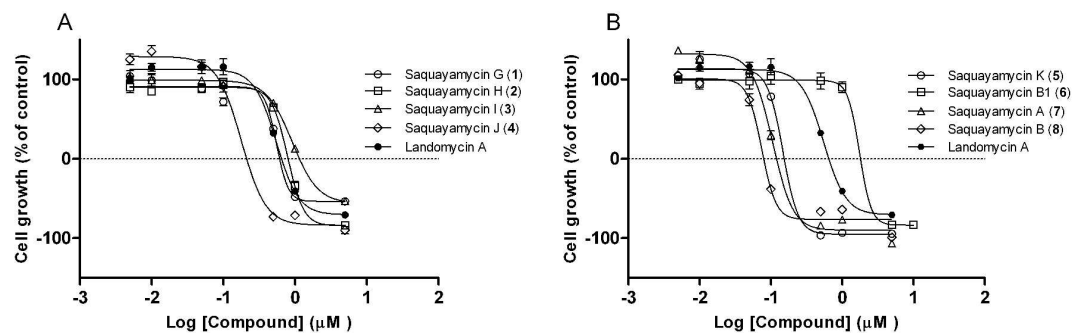

**Figure S 66:** Dose response curve of **A)** saquayamycins G-J (1-4), and **B)** saquayamycins K, B1, A and B (5-8); in comparison with landomycin A in a prostate cancer cell line (PC3) at 48 h.

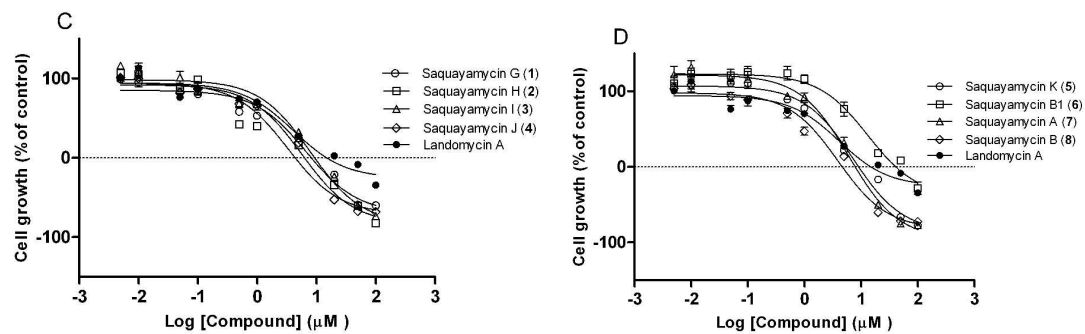

**Figure S67:** Dose response curve of **C)** saquayamycins G-J (1-4), and **D)** saquayamycins K, B1, A and B (5-8); in comparison with landomycin A in a non-small lung cancer cell line (H460) at 48 h.
